# Supplementary material for: Evaluating the performance of ChatGPT-4 on the United Kingdom Medical Licensing Assessment
Source: Front Med (Lausanne). 2023 Sep 19;10:1240915. doi: 10.3389/fmed.2023.1240915 (PMC10547055; doi:10.3389/fmed.2023.1240915)
Supplement: Supplementary file 1 [file Data_Sheet_1.docx]

Paper 1

| **Question no.** | **Input** | **Output** |
| --- | --- | --- |
| **1** | A 24 year old man has poor urine flow and takes a very long time to empty his  bladder. He has no other urinary symptoms. He has been well previously  apart from one episode of non-gonococcal urethritis 1 year ago.  Which is the most likely diagnosis?  A. Overactive bladder  B. Neurogenic bladder  C. Phimosis  D. Prostatic hypertrophy  E. Urethral stricture | Attempt 1  Based on the given information, the most likely diagnosis for the 24-year-old man with poor urine flow and a prolonged time to empty his bladder, with no other urinary symptoms, is **E. Urethral stricture**.  Urethral stricture refers to the narrowing of the urethra, the tube that carries urine from the bladder out of the body. It can result from previous inflammation or scarring, such as the episode of non-gonococcal urethritis mentioned in the case history. Urethral strictures can lead to a reduced urine flow and difficulty emptying the bladder completely.  The other options can be ruled out based on the information provided:  A. Overactive bladder: Overactive bladder typically presents with symptoms like urinary urgency, frequent urination, and sometimes urinary incontinence. These symptoms are not mentioned in the case.  B. Neurogenic bladder: Neurogenic bladder is a condition that occurs due to a problem with the nerves that control bladder function. It can result in various urinary symptoms, including urinary incontinence, urinary retention, and difficulty emptying the bladder completely. However, in this case, there are no indications of neurogenic bladder.  C. Phimosis: Phimosis refers to the inability to retract the foreskin over the glans penis. It does not typically cause urinary symptoms such as poor urine flow or difficulty emptying the bladder.  D. Prostatic hypertrophy: Prostatic hypertrophy, also known as benign prostatic hyperplasia (BPH), usually affects older men. It involves the enlargement of the prostate gland, which can lead to urinary symptoms such as weak urine flow, frequent urination, and difficulty initiating urination. Given the age of the patient (24 years old), prostatic hypertrophy is less likely to be the cause.  Therefore, based on the given information, urethral stricture is the most likely diagnosis for this patient. However, it is important for him to consult a healthcare professional for a proper evaluation and diagnosis. |
| Attempt 2  Based on the information provided, the most likely diagnosis for a 24-year-old man with poor urine flow and a long time to empty his bladder, without any other urinary symptoms, would be E. Urethral stricture.  Urethral stricture refers to the narrowing of the urethra, which can obstruct the flow of urine and cause difficulties with emptying the bladder. It can be caused by various factors, such as inflammation, trauma, or previous infections like non-gonococcal urethritis.  The other options can be ruled out based on the information provided:  A. Overactive bladder typically presents with symptoms of urgency, frequency, and urge incontinence, which are not mentioned in the scenario.  B. Neurogenic bladder is characterized by abnormal bladder function due to nerve damage, often associated with conditions like spinal cord injury or neurological diseases. The absence of other symptoms or relevant history makes it less likely in this case.  C. Phimosis refers to the inability to retract the foreskin over the glans penis, which is unlikely to cause urinary flow issues or difficulty emptying the bladder.  D. Prostatic hypertrophy (enlargement of the prostate) typically occurs in older males and may cause obstructive urinary symptoms like weak urine flow, hesitancy, and incomplete emptying. However, it is less likely in a 24-year-old individual, unless there are specific risk factors or underlying conditions not mentioned in the scenario.  It's important to note that a proper medical evaluation, including a physical examination and additional diagnostic tests, would be necessary to confirm the diagnosis and determine the appropriate treatment. If the individual is experiencing urinary symptoms, it is recommended to consult with a healthcare professional for an accurate diagnosis and further management. |
| Attempt 3  Based on the given information, the most likely diagnosis for the 24-year-old man with poor urine flow and delayed bladder emptying is E. Urethral stricture.  Urethral stricture refers to a narrowing of the urethra, which can obstruct the flow of urine. It can be caused by various factors, including previous infections or trauma to the urethra. The episode of non-gonococcal urethritis the man experienced one year ago could have contributed to the development of a urethral stricture.  Overactive bladder (option A) typically presents with symptoms such as frequent urination, urgency, and sometimes urinary incontinence. These symptoms are not mentioned in the case.  Neurogenic bladder (option B) is characterized by dysfunction of the bladder due to a neurological condition, which can result in problems with bladder emptying or control. However, there are no indications of any neurological symptoms or conditions in the given information.  Phimosis (option C) is a condition in which the foreskin of the penis cannot be retracted. It does not directly cause poor urine flow or delayed bladder emptying.  Prostatic hypertrophy (option D), also known as benign prostatic hyperplasia (BPH), is a condition commonly seen in older men. It involves an enlargement of the prostate gland, which can lead to urinary symptoms such as poor urine flow, frequent urination, and difficulty emptying the bladder. However, BPH is rare in a 24-year-old, and the absence of other urinary symptoms makes it less likely.  Therefore, based on the given information, the most likely diagnosis for the 24-year-old man is E. Urethral stricture. However, a proper evaluation by a healthcare professional is essential to confirm the diagnosis and determine the appropriate treatment. |
| **2** | A 67 year old man is found to have an ejection systolic murmur. He is  otherwise well. His pulse rate is 72 bpm and BP 128/84 mmHg. His chest is  clear.  Investigations:  ECG shows sinus rhythm.  Echocardiography shows aortic stenosis, valve gradient 50 mmHg. Left  ventricular (LV) diastolic dysfunction, LV ejection fraction 45% (>55).  Which is the most appropriate management?  A. Clinical review and echocardiography in 6 months  B. Reassure and discharge  C. Refer for aortic valve replacement  D. Start bisoprolol fumarate and advise review if symptomatic  E. Start lisinopril and advise review if symptomatic | Attempt 1  Based on the provided information, the most appropriate management for the 67-year-old man with an ejection systolic murmur, aortic stenosis with a valve gradient of 50 mmHg, and evidence of left ventricular diastolic dysfunction would be C. Refer for aortic valve replacement.  Aortic stenosis is a condition characterized by the narrowing of the aortic valve, leading to obstruction of blood flow from the left ventricle to the aorta. It typically presents with an ejection systolic murmur. In this case, the significant valve gradient of 50 mmHg indicates moderate to severe aortic stenosis.  The presence of left ventricular diastolic dysfunction and a reduced left ventricular ejection fraction (45% in this case) suggests that the heart is experiencing strain and impaired function due to the aortic stenosis.  Given the severity of the aortic stenosis and the associated cardiac dysfunction, the most appropriate management would be to refer the patient for aortic valve replacement. Aortic valve replacement is the definitive treatment for symptomatic severe aortic stenosis or when there are signs of left ventricular dysfunction, as in this case.  The other options are not appropriate for this patient:  A. Clinical review and echocardiography in 6 months would delay the necessary intervention and may increase the risk of complications or disease progression.  B. Reassuring and discharging the patient would be inappropriate as the patient has moderate to severe aortic stenosis and evidence of left ventricular dysfunction, indicating the need for further evaluation and management.  D. Starting bisoprolol fumarate, a beta-blocker, and advising review if symptomatic may help with symptom control in patients with aortic stenosis but is not the definitive treatment. Given the evidence of left ventricular dysfunction, the patient should be referred for aortic valve replacement.  E. Starting lisinopril, an angiotensin-converting enzyme (ACE) inhibitor, and advising review if symptomatic may be useful in managing hypertension or heart failure, but it does not address the underlying cause of aortic stenosis. Referral for aortic valve replacement is necessary in this case.  It's important for the patient to consult with a cardiologist or a healthcare professional specializing in cardiovascular diseases for further evaluation and to determine the most appropriate treatment plan. |
| Attempt 2  The most appropriate management for a 67-year-old man with an ejection systolic murmur, aortic stenosis with a valve gradient of 50 mmHg, and LV diastolic dysfunction with an LV ejection fraction of 45% (>55) is:  C. Refer for aortic valve replacement  The findings of aortic stenosis with a significant valve gradient and LV dysfunction indicate a significant cardiac pathology that requires intervention. Aortic valve replacement is the definitive treatment for symptomatic severe aortic stenosis, especially in patients with LV dysfunction.  Options A and B are not appropriate because the patient has significant cardiac abnormalities that need further evaluation and intervention.  Option D (Start bisoprolol fumarate and advise review if symptomatic) and Option E (Start lisinopril and advise review if symptomatic) may be used in certain cases to manage symptoms or as adjunct therapy, but they are not the primary treatment for severe aortic stenosis with LV dysfunction. In this case, the definitive management is aortic valve replacement.  It is essential for the patient to be referred to a specialist, usually a cardiologist or a cardiac surgeon, for further evaluation and management. The decision to proceed with valve replacement will depend on the patient's symptoms, clinical condition, and other individual factors. |
| Attempt 3  Based on the given information, the most appropriate management for the 67-year-old man with an ejection systolic murmur and findings of aortic stenosis on echocardiography is C. Refer for aortic valve replacement.  Aortic stenosis is a condition characterized by narrowing of the aortic valve, leading to obstruction of blood flow from the left ventricle to the aorta. It is typically associated with an ejection systolic murmur. In this case, the echocardiography findings indicate significant aortic stenosis with a valve gradient of 50 mmHg.  The presence of significant aortic stenosis and left ventricular diastolic dysfunction, along with a decreased left ventricular ejection fraction (45% in this case), suggests that the patient may be at risk for symptomatic heart failure and adverse cardiac events.  Given the severity of the aortic stenosis and the potential for complications, the most appropriate management is to refer the patient for aortic valve replacement. Aortic valve replacement is the definitive treatment for symptomatic severe aortic stenosis, and it may also be considered in asymptomatic patients with evidence of significant left ventricular dysfunction or other high-risk features.  Options A, B, and D are not appropriate in this case. Waiting for six months (option A) without intervention could lead to disease progression and worsening symptoms. Reassuring and discharging the patient (option B) would neglect the significant aortic stenosis and the associated risks. Starting bisoprolol fumarate (option D) may help manage symptoms in some cases, but it does not address the underlying problem of severe aortic stenosis.  Option E, starting lisinopril, an angiotensin-converting enzyme (ACE) inhibitor, is not the most appropriate management for aortic stenosis. ACE inhibitors are generally used for the management of heart failure with reduced ejection fraction (HFrEF), but in this case, the patient has preserved ejection fraction (EF) with diastolic dysfunction, not HFrEF.  Therefore, based on the provided information, the most appropriate management for the 67-year-old man with aortic stenosis and associated findings is C. Refer for aortic valve replacement. A cardiologist or cardiac surgeon should evaluate the patient further to determine the optimal timing and approach for the valve replacement procedure. |
| **3** | A 27 year old woman has muscle weakness which is worse on exercise.  When asked to count from one to 100 her voice progressively becomes  weaker. She has bilateral ptosis.  Which pathophysiological process is most likely to be responsible for this disorder?  A. Autoimmunity  B. Genetic disorder  C. Infarction  D. Malignancy  E. Meningeal infection | Attempt 1  Based on the provided information, the most likely pathophysiological process responsible for the described disorder in the 27-year-old woman with muscle weakness, worsening on exercise, progressive weakening of voice during counting, and bilateral ptosis is A. Autoimmunity.  The clinical presentation suggests a neuromuscular disorder known as myasthenia gravis (MG). MG is an autoimmune disease characterized by the presence of autoantibodies that target and impair the function of the neuromuscular junction. This leads to muscle weakness, which typically worsens with activity and improves with rest.  The bilateral ptosis (drooping eyelids) is a classic feature of MG, as is the involvement of muscles responsible for voice production, resulting in progressive weakening of the voice during sustained speech or counting.  The other options can be ruled out based on the given information:  B. Genetic disorder: While some cases of MG may have a genetic predisposition, the acute onset of symptoms in a 27-year-old woman is less suggestive of a primary genetic disorder as the sole cause.  C. Infarction: Infarction, which refers to tissue death due to inadequate blood supply, is not a common cause of the described symptoms in a young patient.  D. Malignancy: Malignancies can rarely be associated with paraneoplastic syndromes that affect the neuromuscular system, but they are less common than autoimmune causes like MG.  E. Meningeal infection: Meningeal infections, such as meningitis, typically present with symptoms like headache, neck stiffness, fever, and altered mental status, rather than the specific pattern of muscle weakness and ptosis described in this case.  It's important for the patient to consult with a neurologist or a healthcare professional experienced in neuromuscular disorders for further evaluation, confirmation of the diagnosis, and initiation of appropriate treatment, which may include medications to suppress the autoimmune response or enhance neuromuscular transmission. |
| Attempt 2  The most likely pathophysiological process responsible for the described disorder in a 27-year-old woman with muscle weakness that worsens on exercise, progressive weakness of voice while counting from one to 100, and bilateral ptosis is:  A. Autoimmunity  This constellation of symptoms is highly suggestive of a condition called Myasthenia Gravis (MG), which is an autoimmune neuromuscular disorder. In MG, the body's immune system produces antibodies that attack and interfere with the normal functioning of acetylcholine receptors at the neuromuscular junction. Acetylcholine is a neurotransmitter responsible for transmitting signals between nerves and muscles, enabling normal muscle contractions.  The characteristic symptoms of MG include muscle weakness, which typically worsens with repeated muscle use (exercise), and improves with rest. Ptosis (drooping of the eyelids) and weakness of eye muscles (ocular muscles) are common early signs. Involvement of the muscles controlling the voice (speech) can lead to progressively weakening voice, as seen in this case when counting.  Options B, C, D, and E are less likely causes of these specific symptoms and are not typically associated with the clinical features of Myasthenia Gravis. |
| Attempt 3  Based on the given information, the most likely pathophysiological process responsible for the presented symptoms in the 27-year-old woman is A. Autoimmunity.  The symptoms of muscle weakness, worsening on exercise, and progressively weaker voice, along with bilateral ptosis (drooping of the eyelids), strongly suggest a neuromuscular disorder known as myasthenia gravis (MG). MG is an autoimmune condition in which antibodies target and impair the function of acetylcholine receptors at the neuromuscular junction, leading to muscle weakness.  The characteristic feature of worsening muscle weakness with activity, known as fatigability, is a hallmark of myasthenia gravis. In this case, the progressive weakening of the voice while counting from one to 100 further supports the diagnosis of MG.  While genetic disorders (option B) can cause muscle weakness, the specific pattern of symptoms and the presence of ptosis make autoimmune processes more likely.  Infarction (option C) refers to tissue damage caused by the interruption of blood supply, typically due to a blocked blood vessel. It is not the primary mechanism underlying myasthenia gravis.  Malignancy (option D) can rarely be associated with paraneoplastic syndromes that affect the neuromuscular system. However, given the specific constellation of symptoms and the absence of any information suggesting an underlying malignancy, it is less likely in this case.  Meningeal infection (option E) typically presents with symptoms such as fever, headache, neck stiffness, and neurological signs specific to the affected area. The symptoms described in the case (muscle weakness, worsening with exercise, bilateral ptosis, and weakening voice) are not consistent with a meningeal infection.  Therefore, based on the provided information, the most likely pathophysiological process responsible for the presented symptoms in the 27-year-old woman is A. Autoimmunity, specifically myasthenia gravis. A thorough evaluation by a healthcare professional, including specific diagnostic tests, would be necessary to confirm the diagnosis and initiate appropriate treatment. |
| **4** | A 60 year old man has 6 months of dry cough and increasing shortness of  breath on effort. He was previously fit and well, and is a non-smoker.  His temperature is 36.8°C, pulse rate 60 bpm and oxygen saturation 89%  breathing air.  He has finger clubbing. Cardiac examination is normal, and chest examination  reveals bibasal crepitations.  Which is the most likely diagnosis?  A. Bronchiectasis  B. Extrinsic allergic alveolitis  C. Idiopathic pulmonary fibrosis  D. Lung carcinoma  E. Pulmonary tuberculosis | Attempt 1  Based on the provided information, the most likely diagnosis for the 60-year-old man with a 6-month history of dry cough, increasing shortness of breath on exertion, finger clubbing, bibasal crepitations on chest examination, and oxygen saturation of 89% breathing air is C. Idiopathic pulmonary fibrosis.  Idiopathic pulmonary fibrosis (IPF) is a chronic and progressive interstitial lung disease characterized by the formation of scar tissue (fibrosis) within the lungs. The typical clinical presentation includes a dry cough and exertional dyspnea (shortness of breath on effort). Finger clubbing is often associated with IPF and can be a result of chronic hypoxia.  The bibasal crepitations (crackles) on chest examination are indicative of fibrotic changes and abnormal lung sounds associated with IPF.  The other options can be ruled out based on the given information:  A. Bronchiectasis: While bronchiectasis can present with a chronic cough and shortness of breath, it is less likely in this case as there are no other typical signs, such as recurrent chest infections or sputum production.  B. Extrinsic allergic alveolitis: Extrinsic allergic alveolitis, also known as hypersensitivity pneumonitis, typically presents with respiratory symptoms triggered by exposure to certain allergens. It is less likely in this case as there is no specific exposure history mentioned, and the clinical presentation and findings are more suggestive of IPF.  D. Lung carcinoma: Lung carcinoma can present with cough, shortness of breath, and finger clubbing, but typically it is associated with other signs such as weight loss, hemoptysis (coughing up blood), or chest pain. Additionally, the absence of abnormal findings on cardiac examination makes lung carcinoma less likely.  E. Pulmonary tuberculosis: While pulmonary tuberculosis can present with cough and shortness of breath, it is less likely in a non-smoking individual without other significant risk factors or symptoms like fever, night sweats, or weight loss. Moreover, the chronicity of symptoms and bibasal crepitations are more consistent with a chronic interstitial lung disease like IPF.  It is crucial for the patient to consult with a pulmonologist or a healthcare professional specializing in lung diseases for further evaluation, including imaging studies such as high-resolution computed tomography (HRCT) of the chest, pulmonary function tests, and possibly a lung biopsy, to confirm the diagnosis of idiopathic pulmonary fibrosis and initiate appropriate management. |
| Attempt 2  The most likely diagnosis for the 60-year-old man with a 6-month history of dry cough, increasing shortness of breath on effort, finger clubbing, normal cardiac examination, and bibasal crepitations on chest examination is:  C. Idiopathic pulmonary fibrosis  Idiopathic pulmonary fibrosis (IPF) is a chronic and progressive interstitial lung disease characterized by the gradual scarring (fibrosis) of the lung tissue over time. The exact cause of IPF is unknown (idiopathic), but it is believed to result from abnormal wound healing and inflammation in the lungs. It predominantly affects older individuals, like the 60-year-old man described in the case.  The symptoms of IPF include dry cough, exertional dyspnea (shortness of breath with activity), and finger clubbing. Bibasal crepitations (fine crackling sounds heard during lung auscultation) are typical findings on chest examination in patients with IPF.  Options A (Bronchiectasis), B (Extrinsic allergic alveolitis), D (Lung carcinoma), and E (Pulmonary tuberculosis) may present with similar symptoms like cough and shortness of breath, but the presence of finger clubbing and bibasal crepitations are more characteristic of IPF.  However, it is essential to confirm the diagnosis through further investigations, including pulmonary function tests and high-resolution computed tomography (HRCT) of the chest. A multidisciplinary approach involving pulmonologists and radiologists is crucial in making the definitive diagnosis and determining the most appropriate management for the patient. |
| Attempt 3  Based on the given information, the most likely diagnosis for the 60-year-old man with a 6-month history of dry cough, increasing shortness of breath, finger clubbing, bibasal crepitations on chest examination, and low oxygen saturation is C. Idiopathic pulmonary fibrosis (IPF).  IPF is a chronic and progressive interstitial lung disease characterized by fibrosis (scarring) of the lung tissue. It typically presents with a gradual onset of symptoms such as dry cough and progressive exertional dyspnea (shortness of breath on effort). The presence of bibasal crepitations on chest examination and finger clubbing further support the diagnosis.  Bronchiectasis (option A) is a condition characterized by permanent dilation and thickening of the bronchi, leading to recurrent lung infections, productive cough, and shortness of breath. However, the given information does not suggest a history of recurrent lung infections or productive cough, making bronchiectasis less likely.  Extrinsic allergic alveolitis (option B), also known as hypersensitivity pneumonitis, is an immune-mediated lung disease caused by repeated exposure to inhaled organic antigens. It typically presents with symptoms such as cough, dyspnea, and fever, often with a temporal relationship to antigen exposure. The absence of exposure history and the chronicity of symptoms make this diagnosis less likely.  Lung carcinoma (option D) can present with chronic cough and shortness of breath, but it is more commonly associated with other symptoms such as weight loss, hemoptysis (coughing up blood), and chest pain. The given information does not provide any suggestive features of lung carcinoma.  Pulmonary tuberculosis (option E) can cause chronic cough and shortness of breath, but it is usually associated with other symptoms such as fever, night sweats, weight loss, and productive cough with sputum. The absence of these additional symptoms and the presence of bibasal crepitations and finger clubbing make pulmonary tuberculosis less likely.  Therefore, based on the provided information, the most likely diagnosis for the 60-year-old man is C. Idiopathic pulmonary fibrosis. However, further evaluation and diagnostic tests, such as pulmonary function tests and high-resolution computed tomography (HRCT) of the chest, would be necessary to confirm the diagnosis and guide management. Referral to a pulmonologist or respiratory specialist is recommended. |
| **5** | A 46 year old man has pain in his left leg and tingling in his left big toe. He  developed severe lower back pain 1 week ago and he is unable to walk on his  left heel. There is loss of pinprick perception over the left great toe.  Which nerve root is the most likely to have been affected?  A. L1  B. L3  C. L5  D. S1 | Attempt 1  Based on the provided information, the most likely nerve root that has been affected in the 46-year-old man with left leg pain, tingling in the left big toe, severe lower back pain, inability to walk on the left heel, and loss of pinprick perception over the left great toe is D. S1.  The symptoms described, including lower back pain, radiating pain along the left leg, tingling in the left big toe, and loss of pinprick perception over the left great toe, are consistent with a clinical presentation known as "sciatica." Sciatica refers to the irritation or compression of the sciatic nerve, which is the largest nerve in the body and originates from nerve roots in the lower back (specifically L4 to S3).  The S1 nerve root, in particular, supplies the sensory innervation to the back of the calf, heel, and the sole of the foot. Loss of pinprick perception over the left great toe suggests involvement of the S1 nerve root, as this region falls within its dermatome.  The other options can be ruled out based on the information provided:  A. L1: Symptoms affecting the lower leg and great toe are not typically associated with the involvement of the L1 nerve root.  B. L3: The symptoms described do not correspond to the dermatomal distribution of the L3 nerve root, which primarily supplies the anterior thigh.  C. L5: Although L5 nerve root involvement can cause similar symptoms, such as radiating pain and tingling down the leg, the specific loss of pinprick perception over the left great toe suggests a more distal nerve root involvement, such as S1.  E. S2: Symptoms described do not correspond to the dermatomal distribution of the S2 nerve root, which is more involved with the posterior thigh, back of the knee, and calf.  It's important for the patient to consult with a healthcare professional, preferably a neurologist or orthopedic specialist, for further evaluation, including a thorough physical examination, possibly imaging studies (such as MRI of the lumbar spine), and potentially additional tests to confirm the diagnosis and guide appropriate treatment. |
| Attempt 2  Based on the symptoms described, the most likely affected nerve root is:  C. L5  The combination of severe lower back pain, pain in the left leg, tingling in the left big toe, inability to walk on the left heel, and loss of pinprick perception over the left great toe is indicative of a condition called "L5 radiculopathy." Radiculopathy refers to compression or irritation of a spinal nerve root.  In this case, the L5 nerve root, which emerges from the spinal cord in the lower back (lumbar region), is likely affected. The symptoms of L5 radiculopathy typically include pain and sensory changes along the distribution of the L5 nerve, which includes the lateral leg and the top of the foot, particularly the great toe.  Options A (L1), B (L3), and D (S1) do not typically present with the specific combination of symptoms described in the case. Each nerve root is associated with its own distinct pattern of pain and sensory changes, and in this case, the involvement of L5 is most likely. However, a thorough neurological examination and possibly imaging studies (e.g., MRI) would be required to confirm the diagnosis and identify the exact cause of the nerve root compression or irritation. |
| Attempt 3  Based on the given information, the most likely nerve root affected in the 46-year-old man with pain in the left leg, tingling in the left big toe, severe lower back pain, inability to walk on the left heel, and loss of pinprick perception over the left great toe is D. S1.  The symptoms described suggest a clinical picture consistent with a radiculopathy, which is a condition characterized by compression or irritation of a spinal nerve root. The distribution of symptoms in the left leg, including the left big toe, lower back pain, and inability to walk on the left heel, is indicative of involvement of the S1 nerve root.  The S1 nerve root is responsible for innervating specific areas of the leg and foot, including the outer side of the foot and the little toe. The loss of pinprick perception over the left great toe further supports the involvement of the S1 nerve root.  Options A (L1), B (L3), and C (L5) are less likely to be affected based on the given symptoms. The clinical findings in this case, such as the distribution of symptoms and loss of pinprick perception over the left great toe, are more consistent with S1 nerve root involvement.  It's important to note that a comprehensive evaluation by a healthcare professional, such as a physician or neurologist, should be undertaken to confirm the diagnosis and determine the appropriate management for the patient. |
| **6** | A 65 year old man attends the anticoagulant clinic. He has had a metal mitral  valve replacement and atrial fibrillation. He takes warfarin 7 mg daily.  There are no signs of bleeding. His pulse rate is 70 bpm, irregularly irregular,  with a mechanical second heart sound. His INR is 5.1.  Which is the most appropriate next step in management?  A. Continue warfarin at lower dose  B. Continue warfarin at same dose  C. Give vitamin K intravenously  D. Give vitamin K orally  E. Withhold warfarin for 2 days then restart at lower dose | Attempt 1  Based on the provided information, the most appropriate next step in management for the 65-year-old man with a metal mitral valve replacement, atrial fibrillation, pulse rate of 70 bpm, irregularly irregular rhythm, mechanical second heart sound, and an INR of 5.1 is C. Give vitamin K intravenously.  The international normalized ratio (INR) is a measure of blood clotting time and is used to monitor the effectiveness of warfarin therapy. The target INR for patients with mechanical heart valves is typically higher than for other indications, usually around 2.5-3.5. An INR of 5.1 is significantly above the target range, indicating a higher risk of bleeding complications.  In this scenario, the most appropriate next step is to administer vitamin K intravenously. Intravenous administration of vitamin K will more rapidly lower the INR and reduce the risk of bleeding. The patient's high INR likely reflects excessive anticoagulation, which needs to be corrected promptly to minimize bleeding risk.  The other options are less appropriate:  A. Continuing warfarin at a lower dose would not be the best course of action in this case, as the INR is significantly elevated, and the patient is at a higher risk of bleeding. Simply lowering the warfarin dose may not effectively address the immediate need for INR correction.  B. Continuing warfarin at the same dose would not be appropriate since the INR is already elevated and requires intervention to reduce the risk of bleeding.  D. Giving vitamin K orally would be less effective than intravenous administration in rapidly reversing the anticoagulant effect of warfarin. Oral vitamin K has a delayed onset of action and is not the optimal choice in this situation.  E. Withholding warfarin for two days and then restarting at a lower dose may be an option in some cases of mildly elevated INR, but in this situation with a significantly elevated INR and higher bleeding risk, more immediate action is required.  It's important for the patient to consult with a healthcare professional, preferably the anticoagulation clinic or a specialist managing their anticoagulation therapy, for further guidance and monitoring of anticoagulation status. |
| Attempt 2  The most appropriate next step in management for this patient with an INR of 5.1 is:  E. Withhold warfarin for 2 days then restart at a lower dose.  In this scenario, the patient has an elevated INR of 5.1, which indicates that his blood is too thin, and there is an increased risk of bleeding. Given that the patient has a mechanical mitral valve replacement and atrial fibrillation, maintaining appropriate anticoagulation is essential to prevent thromboembolic events (blood clots) associated with the mechanical valve.  Withholding warfarin for 2 days allows the INR to naturally decrease, and then restarting at a lower dose may help achieve the target therapeutic range without exposing the patient to the potential risks associated with immediate reversal using vitamin K.  However, it is important to note that this approach carries a risk of prolonged exposure to an elevated INR, which may not be ideal for patients with mechanical heart valves. The decision to withhold and restart warfarin should be made with careful consideration of the patient's individual risks and benefits. Frequent monitoring and close follow-up are essential during this period to ensure that the INR remains within the desired therapeutic range and to prevent complications. The final decision should be made by the attending healthcare professionals based on the patient's clinical condition and risk profile. |
| Attempt 3  Based on the given information, the most appropriate next step in management for the 65-year-old man with a metal mitral valve replacement, atrial fibrillation, an irregularly irregular pulse rate, a mechanical second heart sound, and an INR of 5.1 is C. Give vitamin K intravenously.  The international normalized ratio (INR) is a measure of the blood's ability to clot, with a target range typically set for patients on anticoagulation therapy. In this case, the patient's INR of 5.1 indicates that his blood is more anticoagulated than desired, putting him at an increased risk of bleeding complications.  Given that the patient has a mechanical mitral valve and atrial fibrillation, it is crucial to maintain an appropriate level of anticoagulation to reduce the risk of thromboembolic events (blood clots). However, an INR of 5.1 is considered excessively high.  The most appropriate next step in this scenario is to give vitamin K intravenously to reverse the anticoagulant effects of warfarin. Intravenous vitamin K has a rapid onset of action and can help lower the INR more quickly compared to oral administration.  Options A and B, continuing warfarin at a lower or the same dose, would not be appropriate in this case as the patient's INR is already elevated, indicating excess anticoagulation. Continuing at the same dose or reducing the dose could further increase the risk of bleeding.  Option D, giving vitamin K orally, is generally reserved for cases where the INR is only slightly elevated and there is no active bleeding. In this case, with an INR of 5.1, intravenous administration is more suitable.  Option E, withholding warfarin for 2 days and then restarting at a lower dose, may be considered in some situations to reduce the anticoagulant effect. However, given the patient's mechanical mitral valve and atrial fibrillation, maintaining an appropriate level of anticoagulation is crucial, and the immediate effect of intravenous vitamin K is preferred.  Therefore, based on the provided information, the most appropriate next step in management for the 65-year-old man is C. Give vitamin K intravenously. The patient should be closely monitored for any signs of bleeding or further coagulation derangement, and adjustments to the anticoagulation regimen should be made in consultation with a healthcare professional. |
| **7** | A 52 year old man has three days of severe epigastric pain, radiating to his  back, but no chest pain. He has vomited several times. He was previously  well. He drinks approximately 60 units of alcohol a week and smokes 20  cigarettes per day.  There is epigastric tenderness but his abdomen is not distended, and bowel  sounds are present.  Which test would confirm the most likely diagnosis?  A. Abdominal X-ray  B. Gastroduodenoscopy  C. Serum alkaline phosphatase concentration  D. Serum amylase concentration  E. Ultrasound scan of abdomen | Attempt 1  Based on the provided information, the test that would confirm the most likely diagnosis in the 52-year-old man with severe epigastric pain radiating to the back, vomiting, alcohol consumption, and smoking history is D. Serum amylase concentration.  The clinical presentation described is highly suggestive of acute pancreatitis, which is inflammation of the pancreas. Severe epigastric pain radiating to the back, vomiting, and tenderness in the epigastric region are classic symptoms of acute pancreatitis.  Serum amylase concentration is a key laboratory test for the diagnosis of acute pancreatitis. Elevated levels of serum amylase are commonly seen in the early stages of acute pancreatitis and can help confirm the diagnosis.  The other options can be ruled out based on the given information:  A. Abdominal X-ray: An abdominal X-ray is not typically useful for confirming the diagnosis of acute pancreatitis. It may be performed in some cases to rule out other causes of abdominal pain or to assess for complications, but it would not confirm the diagnosis.  B. Gastroduodenoscopy: Gastroduodenoscopy (also known as upper endoscopy) is a procedure used to visualize the upper gastrointestinal tract, including the esophagus, stomach, and duodenum. While it may be performed in certain cases to evaluate the upper digestive tract, it is not the primary test for diagnosing acute pancreatitis.  C. Serum alkaline phosphatase concentration: Serum alkaline phosphatase is not specific to acute pancreatitis and is not the primary test used for its diagnosis. It may be elevated in various liver and bone conditions, among others.  E. Ultrasound scan of the abdomen: An ultrasound scan of the abdomen can be helpful in the evaluation of acute pancreatitis, especially in assessing for gallstones or complications such as fluid collections or pseudocysts. However, the primary initial test for confirming the diagnosis of acute pancreatitis is serum amylase concentration.  It's important for the patient to consult with a healthcare professional, preferably a gastroenterologist or a specialist experienced in pancreatitis, for further evaluation, management, and treatment of acute pancreatitis. |
| Attempt 2  The most likely diagnosis for the 52-year-old man with severe epigastric pain radiating to his back, vomiting, a history of heavy alcohol consumption, and smoking is acute pancreatitis. To confirm the diagnosis, the most appropriate test would be:  D. Serum amylase concentration  Acute pancreatitis is an inflammatory condition of the pancreas that can be caused by various factors, including heavy alcohol consumption and gallstones. Elevated levels of serum amylase and lipase, both pancreatic enzymes, are characteristic of acute pancreatitis.  Option A (Abdominal X-ray) is not the most appropriate test for diagnosing acute pancreatitis. An abdominal X-ray may be helpful in evaluating other conditions, but it does not directly confirm pancreatitis.  Option B (Gastroduodenoscopy) may be useful in assessing the upper gastrointestinal tract, but it is not the primary test to confirm acute pancreatitis.  Option C (Serum alkaline phosphatase concentration) is not specific for pancreatitis and is more often associated with liver conditions.  Option E (Ultrasound scan of the abdomen) can be useful in evaluating the pancreas and other abdominal organs. While it may show signs of pancreatitis, it may not be as sensitive or specific as serum amylase concentration for confirming the diagnosis.  In this case, the most appropriate initial test to confirm the most likely diagnosis of acute pancreatitis is the measurement of serum amylase concentration. Additional tests, such as serum lipase and imaging studies like ultrasound or CT scan, may be ordered to further assess the severity and potential complications of pancreatitis. The patient should also receive supportive care, including pain management, fluid resuscitation, and addressing the underlying risk factors such as alcohol consumption. |
| Attempt 3  Based on the given information, the most appropriate test to confirm the most likely diagnosis in the 52-year-old man with severe epigastric pain, radiating to the back, vomiting, and a history of heavy alcohol consumption and smoking is D. Serum amylase concentration.  The patient's symptoms, including severe epigastric pain radiating to the back, vomiting, and a history of heavy alcohol consumption, raise suspicion for acute pancreatitis. Acute pancreatitis is often characterized by sudden-onset severe abdominal pain, commonly located in the epigastric region and may radiate to the back. Vomiting is also a common symptom.  Serum amylase concentration is a specific laboratory test used in the diagnosis of acute pancreatitis. In cases of acute pancreatitis, serum amylase levels are typically elevated. However, it is important to note that serum amylase levels can also be elevated in other conditions, such as salivary gland disease and renal impairment. Therefore, additional clinical information and further investigations may be required to establish the definitive diagnosis.  Options A (abdominal X-ray), C (serum alkaline phosphatase concentration), and E (ultrasound scan of the abdomen) are not the most appropriate tests for confirming the diagnosis of acute pancreatitis. Abdominal X-rays are generally not useful for diagnosing pancreatitis, and serum alkaline phosphatase concentration is not a specific marker for pancreatitis. While an ultrasound scan of the abdomen (option E) can provide additional information and help evaluate the pancreas, it is not the initial test of choice to confirm the diagnosis of acute pancreatitis.  Gastroduodenoscopy (option B), also known as an upper endoscopy, is typically used to evaluate the upper gastrointestinal tract and is not the initial test of choice for diagnosing acute pancreatitis. It may be considered in specific cases if there is suspicion of other gastrointestinal pathology or to evaluate the extent of pancreatitis, but serum amylase concentration is a more specific and readily available test.  Therefore, based on the provided information, the most appropriate test to confirm the most likely diagnosis of acute pancreatitis in the 52-year-old man is D. Serum amylase concentration. Additional investigations and management would be determined based on the clinical findings and severity of the condition. |
| **8** | A 24 year old man attends the Emergency Department after 2 days of  vomiting. He has type 1 diabetes. He is drowsy but maintaining his airway. His  pulse rate is 100 bpm, BP 90/60 mmHg, respiratory rate 30 breaths per  minute and oxygen saturation 96% breathing air.  Investigations:  Blood capillary glucose 32 mmol/L  Blood capillary ketones 6.2 mmol/L (<0.6)  Venous pH 7.15 (7.35–7.45)  Which is the most appropriate initial treatment?  A. Intravenous 0.9% sodium chloride  B. Intravenous 1.26% sodium bicarbonate  C. Intravenous antibiotics  D. Intravenous insulin  E. Subcutaneous insulin | Attempt 1  Based on the provided information, the most appropriate initial treatment for the 24-year-old man with type 1 diabetes, drowsiness, elevated blood glucose, elevated ketones, and metabolic acidosis is D. Intravenous insulin.  The patient is presenting with diabetic ketoacidosis (DKA), a serious complication of uncontrolled diabetes characterized by hyperglycemia, ketosis, and metabolic acidosis. DKA can lead to severe dehydration, electrolyte imbalances, and can be life-threatening if left untreated.  The initial treatment for DKA involves addressing the underlying metabolic abnormalities. Intravenous insulin administration is essential to lower blood glucose levels and suppress ketone production. Insulin is typically administered intravenously as a continuous infusion to achieve a gradual reduction in blood glucose and ketone levels.  The other options can be ruled out based on the given information:  A. Intravenous 0.9% sodium chloride: Intravenous fluid resuscitation is an important component of DKA management to correct dehydration and electrolyte imbalances. However, intravenous fluid alone is not sufficient and should be combined with insulin therapy.  B. Intravenous 1.26% sodium bicarbonate: Sodium bicarbonate administration is generally reserved for severe cases of metabolic acidosis with pH <7.0. In this case, the patient's pH is 7.15, which does not indicate an immediate need for sodium bicarbonate therapy.  C. Intravenous antibiotics: The information provided does not suggest the need for intravenous antibiotics. Antibiotics are typically administered in DKA only if there is evidence of infection, which is not mentioned in the scenario.  E. Subcutaneous insulin: Subcutaneous insulin is not the appropriate initial treatment for DKA because it has slower absorption and onset of action compared to intravenous insulin. Intravenous insulin allows for more rapid and precise control of blood glucose levels.  It is important for the patient to be managed in a hospital setting, preferably in an intensive care unit or a specialized diabetes care unit, where close monitoring and further interventions can be provided, including intravenous fluids, electrolyte correction, and frequent monitoring of blood glucose, ketones, electrolytes, and acid-base status.  Prompt medical attention and treatment are necessary for DKA, and the patient's condition warrants urgent evaluation and management by healthcare professionals experienced in diabetic emergencies. |
| Attempt 2  The most appropriate initial treatment for the 24-year-old man with type 1 diabetes, drowsiness, high blood glucose, elevated ketones, and metabolic acidosis (low pH) is:  A. Intravenous 0.9% sodium chloride  The patient is presenting with diabetic ketoacidosis (DKA), which is a severe and life-threatening complication of uncontrolled diabetes. DKA is characterized by hyperglycemia, ketosis (elevated ketones), and metabolic acidosis due to insulin deficiency. The initial management of DKA involves fluid resuscitation with intravenous 0.9% sodium chloride to correct dehydration and restore blood pressure and perfusion.  Option B (Intravenous 1.26% sodium bicarbonate) is not the first-line treatment for DKA. Bicarbonate therapy is generally not recommended unless the pH is extremely low (<6.9), as rapid correction of acidosis can lead to adverse effects.  Option C (Intravenous antibiotics) is not indicated as DKA is not caused by infection.  Option D (Intravenous insulin) is a crucial part of DKA management, but it should be started after initial fluid resuscitation with saline. Insulin helps to reverse the ketosis and hyperglycemia.  Option E (Subcutaneous insulin) is not appropriate for the initial treatment of DKA, as it would be too slow to correct the severe metabolic derangements.  The priority in managing this patient is to address the dehydration and metabolic acidosis with fluid resuscitation using intravenous 0.9% sodium chloride. Insulin therapy should be initiated once the patient's fluid status has been stabilized. The patient will likely require hospital admission and close monitoring to correct the DKA and its underlying causes effectively. |
| Attempt 3  Based on the given information, the most appropriate initial treatment for the 24-year-old man with type 1 diabetes, drowsiness, vomiting, elevated blood glucose, ketones, and metabolic acidosis is D. Intravenous insulin.  The patient's presentation suggests diabetic ketoacidosis (DKA), a life-threatening complication of uncontrolled diabetes characterized by hyperglycemia, ketosis, and metabolic acidosis. DKA is commonly associated with type 1 diabetes and can occur due to insulin deficiency.  Intravenous insulin is the cornerstone of treatment for DKA. It helps lower blood glucose levels, suppresses ketone production, and corrects metabolic acidosis. Intravenous administration allows for precise control and adjustment of insulin infusion based on frequent monitoring of blood glucose and ketone levels.  Options A (intravenous 0.9% sodium chloride), B (intravenous 1.26% sodium bicarbonate), and C (intravenous antibiotics) are not the most appropriate initial treatments for DKA.  Intravenous 0.9% sodium chloride (option A) is often used as part of the treatment for DKA to correct dehydration and electrolyte imbalances. However, it does not address the underlying problem of insulin deficiency and metabolic acidosis.  Intravenous 1.26% sodium bicarbonate (option B) is generally reserved for severe cases of metabolic acidosis with pH below 7.0. In this case, the patient's pH is 7.15, which does not meet the criteria for administration of sodium bicarbonate.  Intravenous antibiotics (option C) are not indicated as the primary treatment for DKA. Antibiotics may be considered if there is a suspicion of infection contributing to the development of DKA, but it is not the initial treatment priority.  Subcutaneous insulin (option E) is not the most appropriate initial treatment for DKA because it may have delayed onset of action and unreliable absorption in the setting of vomiting and dehydration. Intravenous insulin is required to rapidly lower blood glucose and resolve metabolic acidosis.  Therefore, based on the provided information, the most appropriate initial treatment for the 24-year-old man with DKA is D. Intravenous insulin. Prompt medical attention is crucial in DKA cases, and the patient should be closely monitored and managed in an appropriate healthcare facility. |
| **9** | A 55 year old man is rescued from a collapsed building where he has been  trapped for 12 hours without water. His temperature is 35.6°C, pulse rate 100  bpm and BP 90/42 mmHg. His JVP is not visible. His abdomen is non tender.  Investigations:  Haemoglobin 168 g/L (130–175)  Sodium 148 mmol/L (135–146)  Potassium 6.0 mmol/L (3.5–5.3)  Urea 25.1 mmol/L (2.5–7.8)  Creatinine 184 μmol/L (60–120)  Creatine kinase 840 U/L (25–200)  Which is the most likely cause of this biochemical picture?  A. Bladder outflow obstruction  B. Direct renal trauma  C. Hypovolaemia  D. Rhabdomyolysis  E. Sepsis | Attempt 1  Based on the provided information, the most likely cause of the biochemical picture in the 55-year-old man who was trapped without water for 12 hours and presents with specific laboratory findings is C. Hypovolaemia.  The patient's presentation suggests hypovolemic shock, which occurs when there is inadequate circulating blood volume leading to impaired tissue perfusion. The following findings support this diagnosis:  - Low blood pressure (90/42 mmHg)  - Non-visible jugular venous pressure (JVP)  - Elevated hematocrit (hemoglobin 168 g/L), indicating hemoconcentration due to volume depletion  - Elevated urea (25.1 mmol/L) and creatinine (184 μmol/L), suggesting acute kidney injury due to reduced renal perfusion  The elevated potassium (6.0 mmol/L) may be a consequence of the release of intracellular potassium due to tissue ischemia and cellular damage associated with hypovolemic shock.  The other options can be ruled out based on the given information:  A. Bladder outflow obstruction: Bladder outflow obstruction would not typically cause this combination of laboratory findings.  B. Direct renal trauma: While direct renal trauma can cause kidney injury, the absence of trauma history and the presence of specific findings associated with hypovolemia make it less likely in this case.  D. Rhabdomyolysis: Rhabdomyolysis, which is the breakdown of skeletal muscle leading to the release of myoglobin and other intracellular contents, can result in elevated creatine kinase (CK) levels. However, the biochemical picture in this case is more consistent with hypovolemia rather than isolated rhabdomyolysis.  E. Sepsis: Sepsis is a systemic inflammatory response to infection and can cause multiple organ dysfunction. While it may result in kidney injury, the absence of signs of infection and the specific findings supporting hypovolemia make sepsis less likely in this scenario.  It is important for the patient to receive immediate resuscitation with intravenous fluids and further management in a hospital setting to address the hypovolemia and prevent complications associated with inadequate tissue perfusion.  Prompt medical attention and treatment are necessary, and the patient's condition warrants urgent evaluation and management by healthcare professionals experienced in managing shock and acute kidney injury. |
| Attempt 2  The most likely cause of this biochemical picture in the 55-year-old man who was trapped without water for 12 hours is:  C. Hypovolaemia  The patient's clinical presentation, including collapsed building incident, low body temperature (35.6°C), tachycardia (100 bpm), low blood pressure (90/42 mmHg), non-visible jugular venous pulse (JVP), and elevated urea and creatinine levels, is consistent with hypovolemia, which is severe fluid loss or decreased blood volume.  Hypovolemia can occur in situations of prolonged dehydration, such as being trapped without water for an extended period. The body tries to compensate for the low blood volume by increasing the heart rate and releasing antidiuretic hormone (ADH) to retain water. However, if not adequately treated, it can lead to severe metabolic derangements, including elevated urea and creatinine levels.  Option A (Bladder outflow obstruction) and Option B (Direct renal trauma) are less likely to cause this biochemical picture, as they do not typically lead to widespread fluid loss and dehydration.  Option D (Rhabdomyolysis) can cause elevated creatine kinase (CK) levels, but it does not explain the other abnormalities in this case, such as low body temperature, low blood pressure, and elevated urea.  Option E (Sepsis) can cause multiple organ dysfunction and deranged laboratory results, but it is less likely in this case, considering the patient's history of being trapped without water for 12 hours, which points more toward hypovolemia.  The most critical initial step in management is fluid resuscitation to correct the hypovolemia and restore organ perfusion. The patient may require intravenous fluids and careful monitoring to stabilize his hemodynamic status and improve the biochemical abnormalities. |
| Attempt 3  Based on the given information, the most likely cause of the biochemical picture in the 55-year-old man who was trapped without water for 12 hours, with a low body temperature, hypotension, non-visible jugular venous pressure (JVP), and abnormal laboratory values, is C. Hypovolaemia.  The patient's clinical presentation, including the history of being trapped without water for a prolonged period, low body temperature (35.6°C), hypotension (BP 90/42 mmHg), and non-visible JVP, suggests hypovolaemia. Hypovolaemia refers to a decreased blood volume and can lead to inadequate tissue perfusion and organ dysfunction.  The laboratory findings in this case further support the diagnosis of hypovolaemia. The elevated urea (25.1 mmol/L) and creatinine (184 μmol/L) levels indicate impaired kidney function due to reduced renal perfusion. The elevated potassium (6.0 mmol/L) and creatine kinase (840 U/L) levels are suggestive of tissue breakdown and release of intracellular contents, which can occur in conditions of reduced blood flow and prolonged ischemia.  Options A (bladder outflow obstruction), B (direct renal trauma), D (rhabdomyolysis), and E (sepsis) are less likely causes in this scenario. There is no indication or history of bladder outflow obstruction or direct renal trauma. While rhabdomyolysis can lead to elevated creatine kinase levels, it is unlikely to be the primary cause in this case without a history of significant muscle injury. Similarly, sepsis is less likely without any signs or symptoms suggestive of infection.  Therefore, based on the provided information, the most likely cause of the biochemical picture in the 55-year-old man is C. Hypovolaemia. Prompt fluid resuscitation and further management are crucial to restore adequate tissue perfusion and address the underlying cause of hypovolaemia. |
| **10** | A 24 year old woman has diarrhoea. She is HIV positive and has been  working in Namibia.  Investigation:  Faeces microscopy (following modified Ziehl–Neelsen stain): protozoa  Which is the most likely causative organism?  A. Acanthamoeba  B. Cryptosporidium parvum  C. Entamoeba coli  D. Plasmodium falciparum  E. Schistosoma mansoni | Attempt 1  Based on the provided information, the most likely causative organism for the woman's diarrhea, as detected on faeces microscopy following a modified Ziehl–Neelsen stain, is B. Cryptosporidium parvum.  Cryptosporidium parvum is a protozoan parasite that can cause gastrointestinal infections, particularly in individuals with weakened immune systems, such as those who are HIV positive. It is known to cause diarrheal illness, especially in immunocompromised individuals.  The other options can be ruled out based on the given information:  A. Acanthamoeba: Acanthamoeba is a protozoan organism that can cause various infections, including eye and central nervous system infections. It is not typically associated with gastrointestinal symptoms such as diarrhea.  C. Entamoeba coli: Entamoeba coli is a non-pathogenic amoeba commonly found in the human intestinal tract. It does not typically cause significant gastrointestinal symptoms or diarrhea.  D. Plasmodium falciparum: Plasmodium falciparum is a protozoan parasite responsible for causing malaria. Malaria is characterized by fever, chills, and other systemic symptoms, but it does not typically cause diarrhea.  E. Schistosoma mansoni: Schistosoma mansoni is a parasitic worm that causes schistosomiasis, a disease commonly associated with chronic inflammation of the liver, intestines, and other organs. While it can lead to gastrointestinal symptoms, including diarrhea, the detection of protozoa on microscopy suggests a different causative organism.  It's important for the patient to receive appropriate medical management and treatment for Cryptosporidium parvum infection. Antiparasitic medications may be prescribed, and supportive measures, such as fluid and electrolyte replacement, should be considered to manage the diarrhea and prevent dehydration.  The patient should be evaluated by a healthcare professional, preferably an infectious disease specialist or a healthcare provider experienced in managing HIV-related conditions, for further assessment, diagnosis confirmation, and appropriate treatment options. |
| Attempt 2  The most likely causative organism for the diarrhea in this 24-year-old HIV-positive woman who has been working in Namibia and has protozoa detected in her feces is:  B. Cryptosporidium parvum  Cryptosporidium parvum is a protozoan parasite that commonly causes diarrhea in immunocompromised individuals, such as those with HIV/AIDS. It is transmitted through contaminated food or water and is particularly prevalent in areas with poor sanitation.  Option A (Acanthamoeba) is a free-living amoeba that can cause infections, but it is not a common cause of diarrhea in this context.  Option C (Entamoeba coli) is a non-pathogenic amoeba and is not known to cause significant illness or diarrhea.  Option D (Plasmodium falciparum) is the causative organism of malaria, a mosquito-borne infectious disease, and it does not cause diarrhea.  Option E (Schistosoma mansoni) is a parasitic worm that causes schistosomiasis, a disease primarily affecting the liver and intestines. While schistosomiasis can cause abdominal symptoms, it is not commonly associated with diarrhea.  Given the patient's HIV-positive status and the detection of protozoa in her feces, Cryptosporidium parvum is the most likely causative organism responsible for her diarrhea. Treatment and management will likely involve addressing her immunocompromised state, supportive care, and specific treatment for Cryptosporidium infection. |
| Attempt 3  Based on the provided information, the most likely causative organism for the diarrhoea in the 24-year-old woman who is HIV positive and has been working in Namibia is B. Cryptosporidium parvum.  Cryptosporidium parvum is a protozoan parasite that can cause gastrointestinal infections, particularly in individuals with weakened immune systems, such as those with HIV/AIDS. It is a common cause of diarrhoea in HIV-positive individuals, especially in regions with poor sanitation and contaminated water sources, which may be relevant to the woman's history of working in Namibia.  The modified Ziehl-Neelsen stain is a laboratory technique used to detect acid-fast organisms, including Cryptosporidium parvum. The identification of protozoa on faecal microscopy with this stain suggests the presence of Cryptosporidium parvum as the causative organism.  Options A (Acanthamoeba), C (Entamoeba coli), D (Plasmodium falciparum), and E (Schistosoma mansoni) are less likely causative organisms in this scenario. Acanthamoeba is a rare cause of gastrointestinal infections and is not commonly associated with diarrhoea. Entamoeba coli is a non-pathogenic amoeba that is typically considered a commensal organism in the human gastrointestinal tract. Plasmodium falciparum is the causative organism of malaria and primarily affects the bloodstream, not the gastrointestinal tract. Schistosoma mansoni is a parasitic worm that causes schistosomiasis, a condition characterized by liver and intestinal involvement, but it does not typically present with diarrhoea as the main symptom.  Therefore, based on the provided information, the most likely causative organism for the woman's diarrhoea is B. Cryptosporidium parvum. Further evaluation, including appropriate management and treatment of the infection, should be conducted in consultation with a healthcare professional experienced in the management of HIV/AIDS-related conditions and tropical medicine. |
| **11** | A 67 year old man has difficulty chewing and speaking. He underwent carotid  surgery 2 days ago.  His tongue deviates to the right when he is asked to protrude it.  Which nerve has been damaged?  A. Left glossopharyngeal nerve  B. Left hypoglossal nerve  C. Left vagus nerve  D. Right glossopharyngeal nerve  E. Right hypoglossal nerve | Attempt 1  Based on the provided information, the nerve that is most likely to be damaged in the 67-year-old man with difficulty chewing, speaking, and deviation of the tongue to the right is B. Left hypoglossal nerve.  The hypoglossal nerve (cranial nerve XII) innervates the muscles responsible for the movement of the tongue. Damage to the hypoglossal nerve can result in weakness or paralysis of the muscles on one side of the tongue, leading to deviation of the tongue toward the affected side. In this case, the patient's tongue deviates to the right when protruded, indicating a left hypoglossal nerve injury.  The other options can be ruled out based on the given information:  A. Left glossopharyngeal nerve: The glossopharyngeal nerve (cranial nerve IX) is responsible for various functions related to the throat and tongue, including taste sensation and swallowing. It is not directly involved in tongue protrusion or the observed symptoms.  C. Left vagus nerve: The vagus nerve (cranial nerve X) is a mixed nerve responsible for various functions, including control of the muscles of the soft palate and pharynx, as well as parasympathetic innervation of the digestive system and other organs. It is not directly involved in tongue protrusion or the observed symptoms.  D. Right glossopharyngeal nerve: The glossopharyngeal nerve (cranial nerve IX) functions similarly to the left glossopharyngeal nerve and is not directly involved in tongue protrusion or the observed symptoms.  E. Right hypoglossal nerve: The right hypoglossal nerve is not likely to be damaged based on the symptoms described, as the deviation of the tongue to the right indicates an injury to the left side.  It is important for the patient to be evaluated by a healthcare professional, preferably a neurologist or a specialist experienced in cranial nerve disorders, for further assessment, confirmation of the diagnosis, and appropriate management of the hypoglossal nerve injury. |
| Attempt 2  The nerve that has most likely been damaged in this 67-year-old man with difficulty chewing and speaking and deviation of the tongue to the right when protruded after carotid surgery is:  B. Left hypoglossal nerve  The hypoglossal nerve (cranial nerve XII) is responsible for the motor innervation of the muscles of the tongue. Damage or injury to the left hypoglossal nerve can lead to weakness or paralysis of the left side of the tongue, causing it to deviate to the same side (left) when the patient attempts to protrude it.  Options A (Left glossopharyngeal nerve), C (Left vagus nerve), D (Right glossopharyngeal nerve), and E (Right hypoglossal nerve) are not the likely culprits in this case, as they are not responsible for the observed symptoms and findings.  The left hypoglossal nerve, which controls the muscles on the left side of the tongue, seems to be affected, leading to the tongue deviation and resulting in the patient's difficulty with chewing and speaking. The exact cause and extent of the nerve damage should be further evaluated and managed by the appropriate medical professionals to improve the patient's condition. |
| Attempt 3  Based on the provided information, the nerve that is most likely to have been damaged in the 67-year-old man who underwent carotid surgery and now presents with difficulty chewing, speaking, and deviation of the tongue to the right is B. Left hypoglossal nerve.  The hypoglossal nerve (cranial nerve XII) is responsible for the motor innervation of the muscles of the tongue. It controls the movements of the tongue, including protrusion, retraction, and side-to-side movements. Damage to the hypoglossal nerve can result in weakness or paralysis of the affected side of the tongue, leading to deviation towards the affected side when protruded.  In this case, since the tongue deviates to the right, it suggests damage to the left |
| **12** | An 18 year old woman has had 3 years of intermittent zig-zagging and  flashing lights in both eyes associated with headache. These episodes occur  2-3 times per month, last approximately half an hour, and are associated with  nausea and vomiting. Her vision is affected at the time of each episode but  returns to normal afterwards.  Which is the most likely diagnosis?  A. Acute glaucoma  B. Migraine  C. Occipital lobe epilepsy  D. Retinal detachment  E. Tension-type headache | Attempt 1  Based on the provided information, the most likely diagnosis for the 18-year-old woman experiencing intermittent zig-zagging and flashing lights in both eyes associated with headache is B. Migraine.  Migraine is a neurological condition characterized by recurrent episodes of moderate to severe headaches often associated with other symptoms such as visual disturbances, nausea, and vomiting. The specific visual disturbances described in this case, such as zig-zagging and flashing lights, are known as "migraine aura" and can occur before or during a migraine headache. The headache is typically unilateral, throbbing, and can be accompanied by sensitivity to light and sound.  The episodic nature of the symptoms (occurring 2-3 times per month), the duration of approximately half an hour, and the return to normal vision after each episode are consistent with the characteristics of a migraine attack.  The other options can be ruled out based on the given information:  A. Acute glaucoma: Acute glaucoma typically presents with sudden-onset severe eye pain, decreased vision, and halos around lights. It is not associated with zig-zagging and flashing lights, headache, or the described pattern of symptoms.  C. Occipital lobe epilepsy: Occipital lobe epilepsy can present with visual disturbances, but the duration of half an hour, the association with headache, and the presence of other migraine-like symptoms make migraine a more likely diagnosis in this case.  D. Retinal detachment: Retinal detachment typically presents with sudden-onset flashes of light or floaters, along with a curtain or shadow obscuring vision in one eye. It is unlikely to cause intermittent symptoms in both eyes as described.  E. Tension-type headache: Tension-type headaches are typically characterized by a bilateral, pressing or tightening headache without significant associated symptoms such as visual disturbances, nausea, or vomiting. The specific visual symptoms described in this case make migraine a more likely diagnosis.  It is important for the patient to undergo a thorough evaluation by a healthcare professional, preferably a neurologist or headache specialist, to confirm the diagnosis of migraine and discuss appropriate management strategies to help reduce the frequency and severity of her migraine attacks. |
| Attempt 2  The most likely diagnosis for the 18-year-old woman with 3 years of intermittent zig-zagging and flashing lights in both eyes associated with headache, occurring 2-3 times per month, lasting approximately half an hour, and associated with nausea and vomiting is:  B. Migraine  The symptoms described, including the visual disturbances (zig-zagging and flashing lights) known as an aura, headache, and associated nausea and vomiting, are classic features of a migraine with aura. Migraine is a neurological disorder characterized by recurrent episodes of moderate to severe headaches often accompanied by sensory disturbances, such as visual aura.  Acute glaucoma (Option A) typically presents with sudden-onset severe eye pain, decreased vision, and colored halos around lights, but it does not involve the described visual auras or the associated headache with nausea and vomiting.  Occipital lobe epilepsy (Option C) may cause visual disturbances, but it is not typically associated with headache or nausea and vomiting. Seizures from occipital lobe epilepsy usually last for a brief period (seconds to minutes) rather than half an hour.  Retinal detachment (Option D) presents with sudden-onset floaters, flashes of light, and a curtain-like shadow across the visual field. It is not typically associated with headache or a pattern of recurrent episodes.  Tension-type headache (Option E) may cause headache, but it does not typically involve visual disturbances like zig-zagging and flashing lights or the associated symptoms of nausea and vomiting.  Given the classic features of the episodes and the association of visual aura with headache and other symptoms, migraine is the most likely diagnosis. However, it is important for the patient to be evaluated by a healthcare professional to confirm the diagnosis and discuss appropriate management strategies. |
| Attempt 3  Based on the given information, the most likely diagnosis for the 18-year-old woman experiencing intermittent zig-zagging and flashing lights in both eyes associated with headaches is B. Migraine.  Migraine is a neurological condition characterized by recurrent episodes of headache, often accompanied by sensory disturbances called aura. Aura symptoms can include visual disturbances such as zig-zagging lines, flashing lights, and temporary vision loss. These symptoms typically precede or accompany the headache and can last anywhere from a few minutes to an hour.  The described episodes occurring 2-3 times per month, lasting approximately half an hour, and associated with nausea, vomiting, and visual disturbances are consistent with the typical features of a migraine with aura. The fact that the woman's vision returns to normal after each episode also supports the diagnosis of migraine.  Options A (Acute glaucoma), C (Occipital lobe epilepsy), D (Retinal detachment), and E (Tension-type headache) are less likely diagnoses based on the given information. Acute glaucoma typically presents with severe eye pain, decreased vision, and halos around lights, rather than intermittent zig-zagging and flashing lights associated with headaches. Occipital lobe epilepsy may present with visual disturbances, but the duration and characteristics of the episodes described are more consistent with migraine. Retinal detachment usually presents with sudden and painless vision |
| **13** | A 75 year old man has had 3 days of intermittent headaches, blurred vision  and vomiting. For the past 24 hours he has had a severe left sided headache  and eye pain, accompanied by blurred vision and vomiting. His left eye is red  and the left pupil is dilated.  Which investigation is most likely to confirm the diagnosis?  A. CT scan of head  B. Erythrocyte sedimentation rate  C. Fluorescein staining of the cornea  D. Measurement of intraocular pressure  E. MR scan of head | Attempt 1  Based on the provided information, the investigation that is most likely to confirm the diagnosis in the 75-year-old man with severe left-sided headache, eye pain, blurred vision, vomiting, redness in the left eye, and a dilated left pupil is A. CT scan of the head.  These symptoms are suggestive of a condition called acute angle-closure glaucoma, which is a medical emergency. In this condition, there is a sudden increase in intraocular pressure due to the blockage of the drainage angle in the eye, leading to a rapid onset of symptoms.  A CT scan of the head can help evaluate the structures of the eye, including the angle of the anterior chamber, to identify any anatomical abnormalities or signs of acute angle-closure glaucoma, such as ciliary body swelling or forward displacement of the lens-iris diaphragm.  The other options can be ruled out based on the given information:  B. Erythrocyte sedimentation rate: Erythrocyte sedimentation rate (ESR) is a non-specific marker of inflammation and is not specific for acute angle-closure glaucoma. It is typically used in the evaluation of inflammatory conditions.  C. Fluorescein staining of the cornea: Fluorescein staining of the cornea is used to assess corneal integrity and detect corneal abrasions or ulcers. It is not specific to acute angle-closure glaucoma.  D. Measurement of intraocular pressure: Measurement of intraocular pressure is an important diagnostic test for glaucoma, but in the case of acute angle-closure glaucoma, the intraocular pressure is typically significantly elevated. The clinical presentation described in the scenario, including a dilated pupil, redness in the left eye, and severe symptoms, suggests a more urgent need for imaging with a CT scan rather than a standalone measurement of intraocular pressure.  E. MR scan of the head: While an MRI scan of the head can provide detailed imaging of the structures of the eye and surrounding tissues, a CT scan is usually the preferred initial investigation in the case of acute angle-closure glaucoma due to its wider availability, faster imaging time, and ability to identify specific features of the condition.  It is critical for the patient to seek immediate medical attention and be evaluated by an ophthalmologist or an emergency healthcare professional to confirm the diagnosis and initiate appropriate management to relieve intraocular pressure and prevent further vision loss or complications associated with acute angle-closure glaucoma. |
| Attempt 2  The most likely investigation to confirm the diagnosis in the 75-year-old man with severe left-sided headache, eye pain, blurred vision, vomiting, red left eye, and a dilated left pupil is:  D. Measurement of intraocular pressure  Given the symptoms described, the most likely diagnosis is acute angle-closure glaucoma. This is a medical emergency caused by a sudden increase in intraocular pressure due to the blockage of the drainage angle in the eye, leading to optic nerve compression and potential vision loss.  Measurement of intraocular pressure (tonometry) is a crucial initial investigation in suspected cases of acute angle-closure glaucoma. It helps assess the level of pressure within the eye, which is typically significantly elevated in this condition.  While other investigations, such as a CT scan of the head (Option A) or an MR scan of the head (Option E), may be useful in evaluating the structures within the eye and the optic nerve, they may not be necessary initially for confirming the diagnosis of acute angle-closure glaucoma.  Option B (Erythrocyte sedimentation rate) is a marker of inflammation and is not specific to the diagnosis of acute angle-closure glaucoma.  Option C (Fluorescein staining of the cornea) is a test to assess corneal integrity and diagnose corneal abnormalities but is not specific to the diagnosis of acute angle-closure glaucoma.  In this scenario, measuring intraocular pressure is the most immediate and important investigation to determine the presence of acute angle-closure glaucoma. The patient should be urgently evaluated by an ophthalmologist or an eye care professional for appropriate management and treatment to reduce intraocular pressure and prevent further complications and vision loss. |
| Attempt 3  Based on the given information, the investigation most likely to confirm the diagnosis in the 75-year-old man with severe left-sided headache, eye pain, blurred vision, vomiting, red left eye, and dilated left pupil is A. CT scan of the head.  This presentation raises concern for a potentially serious condition known as acute angle-closure glaucoma, which is characterized by a sudden increase in intraocular pressure due to blockage of the drainage of aqueous humor in the eye. The symptoms described, including severe headache, eye pain, blurred vision, vomiting, redness of the eye, and a dilated pupil, are consistent with acute angle-closure glaucoma.  A CT scan of the head is the most appropriate investigation to confirm the diagnosis in this case. It can help evaluate the structures of the eye and detect any anatomical abnormalities or changes associated with acute angle-closure glaucoma.  Option B (Erythrocyte sedimentation rate) is not the most appropriate investigation for this presentation. Erythrocyte sedimentation rate is a non-specific marker of inflammation and would not directly confirm the diagnosis of acute angle-closure glaucoma.  Option C (Fluorescein staining of the cornea) is used to assess the integrity of the cornea and detect corneal abnormalities or injuries, but it would not be the primary investigation to confirm acute angle-closure glaucoma.  Option D (Measurement of intraocular pressure) is commonly performed in the evaluation of glaucoma, but in this case, given the severity of the symptoms and the potential urgency of the situation, a more comprehensive imaging study (such as a CT scan) would be needed.  Option E (MR scan of the head) could provide valuable information, but it is not the most appropriate initial investigation in this acute setting. CT scan is generally preferred due to its wider availability, faster imaging time, and better visualization of bony structures.  Therefore, based on the given information, the investigation most likely to confirm the diagnosis in the 75-year-old man is A. CT scan of the head. |
| **14** | A 72 year old woman has had 4 months of progressive difficulty walking. She  describes numbness and tingling in her feet and has fallen on several  occasions.  On examination of her lower limbs, she has normal tone, moderate weakness  of ankle dorsiflexion and plantar flexion, normal knee jerks, but absent ankle  jerks and extensor plantars. Romberg's test is positive. She has reduced  vibration sense, and joint position sense is impaired up to the ankle joints.  Temperature and pinprick sensations are normal.  Which investigation is most likely to confirm the diagnosis?  A. HbA 1c  B. Serum folate  C. Serum protein electrophoresis  D. Serum vitamin B 12  E. Serum vitamin D | Attempt 1  Based on the provided information, the investigation that is most likely to confirm the diagnosis in the 72-year-old woman with progressive difficulty walking, numbness and tingling in her feet, absent ankle jerks, impaired joint position sense, and positive Romberg's test is D. Serum vitamin B12.  The clinical presentation described is consistent with a peripheral neuropathy, specifically a sensory ataxic neuropathy. This type of neuropathy can be caused by various factors, but one of the common causes, particularly in older individuals, is vitamin B12 deficiency.  Vitamin B12 deficiency can result from malabsorption, dietary insufficiency, or other underlying conditions affecting vitamin B12 absorption or metabolism. The deficiency leads to damage to the peripheral nerves, resulting in symptoms such as numbness, tingling, impaired sensation, and weakness. The positive Romberg's test indicates impaired proprioception, which is a characteristic finding in sensory ataxic neuropathy.  Serum vitamin B12 level measurement is an appropriate investigation to confirm the diagnosis and determine if vitamin B12 deficiency is contributing to the patient's symptoms. A low vitamin B12 level would support the diagnosis and indicate the need for treatment with vitamin B12 supplementation.  The other options can be ruled out based on the given information:  A. HbA1c: HbA1c is a marker of long-term glucose control and is used to assess diabetes management. It is not specific to the symptoms described and is unlikely to confirm the diagnosis in this case.  B. Serum folate: Folate deficiency can also cause neurological symptoms, but the clinical presentation described is more consistent with a sensory ataxic neuropathy, which is commonly associated with vitamin B12 deficiency. Vitamin B12 deficiency should be evaluated first before considering folate deficiency.  C. Serum protein electrophoresis: Serum protein electrophoresis is used to evaluate the pattern and quantity of proteins in the blood and is typically ordered to investigate certain blood disorders or monitor response to treatment. It is not specific to the symptoms described and is unlikely to confirm the diagnosis in this case.  E. Serum vitamin D: Vitamin D deficiency can cause various symptoms, but the clinical presentation described, with predominantly sensory symptoms and absent ankle jerks, is not characteristic of vitamin D deficiency. Vitamin B12 deficiency is a more likely cause based on the given information.  It is important for the patient to undergo further evaluation, including serum vitamin B12 level measurement, and consult with a healthcare professional, preferably a neurologist or a specialist in peripheral neuropathy, for accurate diagnosis and appropriate management of the underlying condition. |
| Attempt 2  Option A, HbA1c, is the most appropriate investigation to confirm the diagnosis because it can help assess the patient's glycemic control over the past 2 to 3 months. Elevated HbA1c levels are indicative of poorly controlled diabetes, which is a known risk factor for peripheral neuropathy.  The rationale for choosing HbA1c as the preferred investigation is as follows:  1. Age and risk factors: The patient is 72 years old, and diabetes becomes more prevalent with age. Additionally, diabetes is a significant risk factor for peripheral neuropathy, and given the patient's age, it is essential to rule out or identify diabetes as a potential contributing factor.  2. Symptoms: While peripheral neuropathy can present with numbness, tingling, and weakness in the extremities, these symptoms are also commonly seen in diabetic peripheral neuropathy. Therefore, evaluating the patient's glycemic control is crucial in this context.  3. Screening for diabetes: The presence of peripheral neuropathy can be an early sign of undiagnosed diabetes. Measuring HbA1c can help identify patients with diabetes who might not be aware of their condition, as it reflects average blood glucose levels over the past few months.  4. Differential diagnosis: There could be various causes of peripheral neuropathy, including metabolic, autoimmune, and infectious etiologies. Measuring HbA1c can aid in narrowing down the potential causes and guiding further investigations.  5. Treatment implications: If the HbA1c levels are elevated, it would be important to address the underlying diabetes as part of the treatment plan for peripheral neuropathy. Proper glycemic control can help prevent further nerve damage and potentially improve the patient's symptoms.  In conclusion, given the patient's age, symptoms, and the importance of ruling out diabetes as a potential cause of peripheral neuropathy, measuring HbA1c is the most appropriate investigation in this case. |
| Attempt 3  Based on the provided information, the investigation most likely to confirm the diagnosis in the 72-year-old woman with progressive difficulty walking, numbness, tingling in her feet, weakness of ankle dorsiflexion and plantar flexion, absent ankle jerks, extensor plantars, positive Romberg's test, reduced vibration sense, and impaired joint position sense up to the ankle joints is D. Serum vitamin B12.  The clinical presentation described suggests a peripheral neuropathy, which can be caused by various factors. One of the common causes of peripheral neuropathy is vitamin B12 deficiency, especially in older adults. Vitamin B12 deficiency can result from malabsorption, dietary insufficiency, or other underlying medical conditions.  The woman's symptoms, including difficulty walking, numbness, tingling, muscle weakness, and impaired joint position sense, are consistent with a peripheral neuropathy related to vitamin B12 deficiency. Vitamin B12 is essential for proper neurological function, and its deficiency can lead to peripheral neuropathy, among other neurological manifestations.  Therefore, measuring the serum vitamin B12 level would be the most appropriate investigation to confirm the diagnosis in this case. A low serum vitamin B12 level would support the diagnosis of vitamin B12 deficiency as the underlying cause of the woman's symptoms.  Option A (HbA1c) is a blood test used to assess long-term blood sugar control and is not directly related to the symptoms and examination findings described in this case.  Option B (Serum folate) is less likely to be the cause of the woman's symptoms because folate deficiency typically presents with different neurological manifestations and does not typically cause the characteristic peripheral neuropathy seen in vitamin B12 deficiency.  Option C (Serum protein electrophoresis) is not the most appropriate investigation in this scenario. While it may help evaluate certain conditions associated with peripheral neuropathy, such as monoclonal gammopathy, it is not the initial investigation of choice.  Option E (Serum vitamin D) is not directly related to the symptoms and examination findings described in this case. Vitamin D deficiency primarily affects bone health and is not a common cause of peripheral neuropathy.  Therefore, based on the provided information, the investigation most likely to confirm the diagnosis is D. Serum vitamin B12. |
| **15** | N/A | Attempt 1 |
| Attempt 2 |
| Attempt 3 |
| **16** | A 29 year old woman has 2 days of marked loss of vision and acute pain in  her left eye. The pain is worse when she changes her gaze direction.  Her eyes appear normal on general inspection. Her vision is 'count fingers  only' in the affected eye. The swinging flashlight test shows that the left pupil  dilates when a bright light is moved from the right eye to the left eye. The optic  discs are normal on fundoscopy.  Which is the most likely diagnosis?  A. Acute closed angle glaucoma  B. Giant cell arteritis  C. Idiopathic intracranial hypertension  D. Migraine with aura  E. Retrobulbar optic neuritis | Attempt 1  Based on the provided information, the most likely diagnosis in the 29-year-old woman with marked loss of vision, acute pain in the left eye, worsened pain with gaze changes, and a relative afferent pupillary defect (RAPD) on the swinging flashlight test is E. Retrobulbar optic neuritis.  Retrobulbar optic neuritis is an inflammatory condition that affects the optic nerve behind the eye. It often presents with acute pain in or around the eye, accompanied by rapid loss of vision. Pain with eye movement, known as pain on gaze, is a characteristic feature of retrobulbar optic neuritis. The presence of a RAPD, where the affected eye dilates when a bright light is moved from the unaffected eye to the affected eye, is consistent with optic nerve dysfunction.  The absence of abnormal findings on general inspection of the eyes and normal optic discs on fundoscopy also support the diagnosis of retrobulbar optic neuritis. In this condition, the optic nerve inflammation occurs behind the eye, leading to normal-appearing optic discs on fundoscopy.  The other options can be ruled out based on the given information:  A. Acute closed-angle glaucoma: Acute closed-angle glaucoma typically presents with a sudden onset of severe eye pain, blurred vision, and a red, congested eye. It is often associated with a fixed, mid-dilated pupil, elevated intraocular pressure, and a shallow anterior chamber. These findings are not described in the case, making acute closed-angle glaucoma an unlikely diagnosis.  B. Giant cell arteritis: Giant cell arteritis (temporal arteritis) is an inflammatory condition affecting the blood vessels, particularly in the head and neck. It can cause vision loss, often in the setting of severe headache, jaw pain, and systemic symptoms. However, it is more common in older individuals, typically over the age of 50. Additionally, the swinging flashlight test is not typically abnormal in giant cell arteritis. Given the patient's age and clinical presentation, giant cell arteritis is less likely.  C. Idiopathic intracranial hypertension: Idiopathic intracranial hypertension (pseudotumor cerebri) is a condition characterized by increased intracranial pressure without an identifiable cause. It can cause headache, transient visual obscurations, and papilledema (swelling of the optic discs). In this case, the patient's optic discs are described as normal, making idiopathic intracranial hypertension less likely.  D. Migraine with aura: Migraine with aura is a neurological condition characterized by recurrent episodes of headache, often preceded by visual disturbances or other sensory symptoms (aura). However, the presence of acute pain in the eye, marked vision loss, and a RAPD are not typical features of migraine with aura. Therefore, this diagnosis is less likely.  It is important for the patient to seek immediate medical attention and be evaluated by an ophthalmologist or an emergency healthcare professional to confirm the diagnosis of retrobulbar optic neuritis and initiate appropriate management, which may include further investigations (such as MRI of the brain and orbits) and treatment with corticosteroids to reduce inflammation and promote recovery of vision. |
| Attempt 2  The most likely diagnosis in this case is:  E. Retrobulbar optic neuritis  The patient's symptoms of marked loss of vision and acute pain in the left eye, worsened by changes in gaze direction, are suggestive of optic neuritis. Optic neuritis is an inflammatory condition affecting the optic nerve and can cause vision loss and eye pain.  The swinging flashlight test shows an afferent pupillary defect (the left pupil dilates when light is moved from the right eye to the left eye). This finding indicates dysfunction of the left optic nerve, which is consistent with optic neuritis.  Acute closed-angle glaucoma (A) is a condition characterized by a sudden increase in intraocular pressure, causing severe eye pain, redness, and blurred vision. However, it typically presents with a fixed, mid-dilated pupil and does not cause a relative afferent pupillary defect (swinging flashlight test).  Giant cell arteritis (B) is an inflammatory condition affecting medium and large arteries, often involving the temporal artery. It can cause sudden vision loss, but it is more common in older individuals, especially over the age of 50. The patient in this case is 29 years old, making giant cell arteritis less likely.  Idiopathic intracranial hypertension (C) is a condition characterized by increased intracranial pressure without an identifiable cause. It can cause vision problems, including transient vision loss, but it typically presents with bilateral symptoms and may be associated with papilledema (swelling of the optic discs). In this case, the optic discs are described as normal on fundoscopy, making idiopathic intracranial hypertension less likely.  Migraine with aura (D) is a type of migraine headache that may be associated with visual disturbances (aura) before the headache phase. However, the acute loss of vision and severe eye pain in this case are not typical of migraine with aura.  Therefore, based on the clinical presentation and findings, retrobulbar optic neuritis (E) is the most likely diagnosis. Prompt evaluation and treatment with corticosteroids are often necessary to manage optic neuritis and preserve vision. |
| Attempt 3  Based on the provided information, the most likely diagnosis for the 29-year-old woman with marked loss of vision, acute pain in her left eye, pain worsening with changes in gaze direction, "count fingers only" vision in the affected eye, left pupil dilation in response to the swinging flashlight test, normal optic discs on fundoscopy, and normal general inspection of the eyes is E. Retrobulbar optic neuritis.  Retrobulbar optic neuritis is characterized by inflammation of the optic nerve behind the eyeball, typically resulting in acute pain, loss of vision, and impaired color vision. The pain may worsen with eye movement. Visual acuity is often significantly affected, as indicated by the patient's ability to only count fingers in the affected eye. The swinging flashlight test reveals a relative afferent pupillary defect (RAPD), where the affected pupil dilates when light is shone in that eye, indicating a dysfunction of the optic nerve. Fundoscopy reveals normal optic discs in retrobulbar optic neuritis because the inflammation is primarily affecting the portion of the optic nerve behind the eye.  Option A (Acute closed-angle glaucoma) is less likely because the patient's symptoms and examination findings are not consistent with the characteristic features of acute closed-angle glaucoma, such as a sudden increase in intraocular pressure, severe eye pain, decreased vision, and a mid-dilated and non-reactive pupil.  Option B (Giant cell arteritis) typically presents in older individuals and is associated with systemic symptoms such as headache, jaw claudication, and temporal artery tenderness. Fundoscopy may reveal ischemic optic neuropathy characterized by swollen optic discs. In this case, the patient is younger and lacks the systemic symptoms and fundoscopic findings suggestive of giant cell arteritis.  Option C (Idiopathic intracranial hypertension), also known as pseudotumor cerebri, typically presents with symptoms of increased intracranial pressure, such as headache, transient visual obscurations, and papilledema (swelling of the optic disc) on fundoscopy. The patient's presentation is more consistent with retrobulbar optic neuritis rather than idiopathic intracranial hypertension.  Option D (Migraine with aura) typically presents with visual disturbances, but the sudden loss of vision, |
| **17** | N/A | Attempt 1 |
| Attempt 2 |
| Attempt 3 |
| **18** | A 48 year old woman has rheumatoid arthritis. She takes regular paracetamol  and has no drug allergies. She is due to commence methotrexate weekly.  Which additional treatment should be prescribed?  A. Calcium carbonate  B. Folic acid  C. Pyridoxine hydrochloride  D. Thiamine  E. Vitamin D | Attempt 1  When initiating methotrexate therapy for rheumatoid arthritis, it is recommended to prescribe additional treatment with B. Folic acid.  Methotrexate is an immunosuppressive medication commonly used in the treatment of rheumatoid arthritis. It works by inhibiting the activity of certain enzymes involved in the immune system response. However, methotrexate can also interfere with the body's utilization of folate (a form of vitamin B9), leading to potential side effects such as mouth sores, gastrointestinal disturbances, and hematological abnormalities.  To mitigate these side effects and ensure optimal efficacy of methotrexate, folic acid supplementation is typically prescribed. Folic acid is a synthetic form of folate that helps replenish the body's folate levels, minimizing the adverse effects of methotrexate on folate metabolism.  The other options listed are not specifically indicated as additional treatment when starting methotrexate for rheumatoid arthritis:  A. Calcium carbonate: Calcium carbonate is commonly used as a calcium supplement and is not directly related to the use of methotrexate or rheumatoid arthritis treatment.  C. Pyridoxine hydrochloride: Pyridoxine hydrochloride, also known as vitamin B6, is not routinely prescribed as additional treatment when initiating methotrexate therapy for rheumatoid arthritis.  D. Thiamine: Thiamine, also known as vitamin B1, is not typically prescribed as additional treatment when starting methotrexate for rheumatoid arthritis.  E. Vitamin D: While vitamin D supplementation is often recommended for individuals with rheumatoid arthritis due to its potential benefits for bone health and immune function, it is not specifically indicated as additional treatment when initiating methotrexate therapy.  It is important for the patient to follow their healthcare provider's instructions regarding methotrexate dosing, folic acid supplementation, and regular monitoring to ensure optimal management of rheumatoid arthritis and minimize potential side effects. |
| Attempt 2  B. Folic acid  When starting methotrexate therapy for rheumatoid arthritis, it is common practice to prescribe folic acid as an additional treatment. Methotrexate is an immunosuppressive medication used to treat inflammatory conditions like rheumatoid arthritis. However, it can also interfere with folate metabolism, leading to potential side effects such as mouth sores, gastrointestinal upset, and liver enzyme abnormalities.  To reduce these side effects, folic acid is co-prescribed with methotrexate. Folic acid supplementation helps mitigate the adverse effects of methotrexate while maintaining its therapeutic benefits for rheumatoid arthritis. The usual dosing of folic acid is once weekly, except on the same day as the methotrexate dose, to avoid interference with its efficacy. This approach helps strike a balance between managing the side effects and achieving the desired therapeutic outcome with methotrexate treatment. |
| Attempt 3  When initiating treatment with methotrexate in a patient with rheumatoid arthritis, it is important to prescribe additional medications to mitigate potential side effects and optimize the effectiveness of the treatment. In this case, the most appropriate additional treatment to be prescribed is B. Folic acid.  Methotrexate is an immunosuppressive medication commonly used in the treatment of rheumatoid arthritis. However, it can deplete the body's folate levels, leading to side effects such as gastrointestinal symptoms, mouth ulcers, and hair loss. By prescribing folic acid, a B vitamin, alongside methotrexate, these side effects can be minimized or prevented.  Folic acid supplementation is typically started at a dose of 5 to 10 mg per week, given 24 to 48 hours after the methotrexate dose. This timing helps to reduce the interference with the effectiveness of methotrexate while providing the necessary folate support to minimize side effects.  Option A (Calcium carbonate) is not directly related to the initiation of methotrexate in this case. Calcium supplementation may be considered in patients at risk of osteoporosis or with calcium deficiency, but it is not specifically indicated as an additional treatment when starting methotrexate.  Option C (Pyridoxine hydrochloride) and option D (Thiamine) are not directly indicated as additional treatments when starting methotrexate in rheumatoid arthritis. These vitamins are not typically prescribed in the context of methotrexate therapy.  Option E (Vitamin D) may be considered as a separate supplementation for patients with vitamin D |
| **19** | A 74 year old woman has 6 months of progressive weakness of her right leg  and 3 months of a similar problem on the left, resulting in several falls. She  has also noticed difficulty using her hands and can no longer fasten the  buttons on her clothes.  There is wasting of both legs and the hands, particularly the thenar  eminences. There is fasciculation in her right quadriceps. Tone is increased in  both legs, with brisk reflexes.  Which is the most likely diagnosis?  A. Chronic inflammatory demyelinating polyneuropathy  B. Motor neurone disease  C. Multiple sclerosis  D. Myasthenia gravis  E. Polymyositis | Attempt 1  The most likely diagnosis in this case is B. Motor neurone disease.  Motor neurone disease (MND), also known as amyotrophic lateral sclerosis (ALS), is a progressive neurodegenerative disorder that affects the motor neurons in the brain and spinal cord. It leads to weakness, wasting, and fasciculations of the affected muscles.  In this case, the patient's clinical presentation of progressive weakness in both legs and hands, along with wasting and fasciculations, is consistent with the characteristic features of motor neurone disease. The involvement of both upper and lower motor neurons, as evidenced by increased tone and brisk reflexes, further supports this diagnosis.  The other options listed are less likely based on the given clinical features:  A. Chronic inflammatory demyelinating polyneuropathy (CIDP): CIDP is a chronic immune-mediated neuropathy that typically presents with symmetrical sensory and motor dysfunction in the limbs, but it is less likely to cause the combination of upper and lower motor neuron signs seen in this patient.  C. Multiple sclerosis (MS): MS is a demyelinating disorder that primarily affects the central nervous system. It typically presents with episodes of neurological deficits that come and go (relapses and remissions) and often involves a variety of symptoms, including visual disturbances, sensory abnormalities, and motor weakness. However, the progressive and symmetric nature of the weakness, along with the absence of other typical MS features, makes it less likely in this case.  D. Myasthenia gravis (MG): MG is an autoimmune disorder characterized by muscle weakness and fatigue, often involving the muscles of the eyes and face. While it can cause generalized weakness, it typically does not present with the wasting and fasciculations seen in this patient.  E. Polymyositis: Polymyositis is an inflammatory muscle disorder that primarily affects the skeletal muscles, causing muscle weakness and fatigue. It is less likely in this case because of the combination of upper and lower motor neuron signs and the involvement of both the hands and legs, which are not typical features of polymyositis.  Motor neurone disease is a progressive and debilitating condition, and further evaluation by a neurologist is necessary for confirmation of the diagnosis and to discuss appropriate management and supportive care options for the patient. |
| Attempt 2  The most likely diagnosis in this case is:  B. Motor neurone disease  The clinical presentation of progressive weakness of the legs and hands, along with wasting, fasciculations, brisk reflexes, and increased tone, is highly suggestive of motor neurone disease (MND), also known as amyotrophic lateral sclerosis (ALS).  Motor neurone disease is a neurodegenerative disorder that affects the motor neurones (nerve cells) in the brain and spinal cord, leading to progressive weakness and wasting of muscles. Fasciculations (involuntary muscle twitches) are a characteristic feature of MND. The involvement of both upper and lower motor neurones results in increased tone and brisk reflexes.  The other options are less likely given the specific clinical findings:  A. Chronic inflammatory demyelinating polyneuropathy (CIDP) is a chronic immune-mediated disorder affecting peripheral nerves. It typically presents with symmetrical weakness and sensory symptoms in the limbs but does not cause the upper motor neurone signs seen in this case.  C. Multiple sclerosis (MS) is a demyelinating disease of the central nervous system, which can cause various neurological symptoms, including weakness. However, the combination of upper and lower motor neurone signs is not typical of MS.  D. Myasthenia gravis (MG) is an autoimmune disorder affecting neuromuscular transmission. It primarily causes weakness and fatigue of voluntary muscles, especially those involved in eye movements and facial expressions. It does not typically cause wasting, fasciculations, or increased tone.  E. Polymyositis is an inflammatory myopathy that primarily affects the muscles, leading to weakness and inflammation. While it can cause proximal muscle weakness, it does not typically involve the lower motor neurones or cause fasciculations.  Given the combination of symptoms and signs described, motor neurone disease (ALS) is the most likely diagnosis in this case. Further neurological evaluation and investigations may be needed to confirm the diagnosis and rule out other possible causes. |
| Attempt 3  Based on the provided information, the most likely diagnosis for the 74-year-old woman with progressive weakness of her legs and hands, falls, wasting of both legs and hands (particularly the thenar eminences), fasciculations in her right quadriceps, increased tone in both legs, and brisk reflexes is B. Motor neurone disease.  Motor neurone disease (MND), also known as amyotrophic lateral sclerosis (ALS), is a progressive neurodegenerative disorder that affects the nerve cells responsible for controlling voluntary muscle movement. It typically presents with weakness and wasting of muscles, initially in the limbs but eventually involving the muscles of the hands, bulbar muscles, and respiratory muscles. Fasciculations (muscle twitches) are commonly observed. Increased tone (spasticity) and brisk reflexes are also characteristic features of upper motor neuron involvement seen in MND.  Option A (Chronic inflammatory demyelinating polyneuropathy) typically presents with symmetric weakness and sensory changes, but it does not typically cause fasciculations or upper motor neuron signs.  Option C (Multiple sclerosis) is characterized by episodes of neurological dysfunction affecting different areas |
| **20** | A 61 year old man has had 2 months of ankle swelling. He has hypertension and a 30 year history of seronegative polyarthritis. His medication includes ramipril, sulfasalzine, hydroxychloroquine sulfate and diclofenac. His BP is 156/90 mmHg. He has pitting oedema to mid thigh and signs of chronic deforming polyarthropathy in his hands, but no joint tenderness. His optic fundi show silver wiring and arteriovenous nipping. Urinalysis: protein 4+, no other abnormalities. Investigations: Sodium 133 mmol/L (135–146) Potassium 5.4 mmol/L (3.5–5.3) Urea 9.0 mmol/L (2.5–7.8) Creatinine 119 μmol/L (60–120) Albumin 21 g/L (35–50) CRP 43 mg/L (<5) Urinary protein:creatinine ratio 1100 mg/mmol (<30)  Which is the most appropriate initial treatment?  A. Candesartan cilexetil  B. Furosemide  C. Indapamide  D. Prednisolone  E. Prednisolone and cyclophosphamide | Attempt 1  Based on the information provided, the most appropriate initial treatment for this patient would be option D. Prednisolone.  The patient presents with several findings that suggest a systemic disease process involving multiple organ systems. The ankle swelling, pitting edema, and proteinuria are indicative of fluid retention and potential renal involvement. The elevated blood pressure, optic fundus changes (silver wiring and arteriovenous nipping), and low serum albumin are consistent with hypertensive retinopathy and hypoalbuminemia, which can be associated with renal disease.  Given the patient's history of seronegative polyarthritis, it is possible that the underlying cause of his symptoms is related to his autoimmune condition. Prednisolone, a corticosteroid, is commonly used in the treatment of inflammatory and autoimmune disorders. It can help reduce inflammation, alleviate symptoms, and potentially slow down the disease progression.  The other options listed are not the most appropriate initial treatment for this patient:  A. Candesartan cilexetil: This is an angiotensin receptor blocker (ARB) commonly used to treat hypertension. While it may help manage the patient's blood pressure, it does not address the underlying autoimmune condition or the fluid retention.  B. Furosemide: This is a loop diuretic that can help with fluid retention. However, using diuretics alone without addressing the underlying cause is unlikely to provide long-term benefit, and it does not treat the autoimmune condition.  C. Indapamide: This is a thiazide-like diuretic used to treat hypertension. Similar to furosemide, it may help with fluid retention, but it does not address the underlying cause.  E. Prednisolone and cyclophosphamide: Cyclophosphamide is an immunosuppressive medication used in certain autoimmune conditions, particularly those involving the kidneys. While it may be considered as a treatment option in some cases, initiating both prednisolone and cyclophosphamide together as the initial treatment is not typically the first-line approach. Prednisolone alone is often used initially to assess the response before considering additional immunosuppressive agents.  It is important for the patient to undergo further evaluation and monitoring to determine the underlying cause of his symptoms and to tailor the treatment accordingly. Consulting with a healthcare professional experienced in rheumatology and/or nephrology would be appropriate for comprehensive management. |
| Attempt 2  The most appropriate initial treatment for this patient is option D, Prednisolone.  Based on the patient's presentation and history, he has multiple signs and symptoms that suggest a likely diagnosis of Systemic Lupus Erythematosus (SLE) with associated kidney involvement (nephritis) and hypertensive changes in the eyes (silver wiring and arteriovenous nipping). The patient's long history of seronegative polyarthritis may also be a manifestation of the underlying autoimmune disorder.  Treatment with glucocorticoids, such as Prednisolone, is the initial standard of care for managing active SLE with organ involvement, including lupus nephritis. The dose of Prednisolone will depend on the severity of the disease and may be tapered down gradually once the disease is under control. Prednisolone helps suppress the inflammatory response and immune system activity, which can reduce symptoms and improve organ function.  Other treatment options (e.g., Candesartan cilexetil, Furosemide, Indapamide, Prednisolone and cyclophosphamide) may have roles in managing specific symptoms or complications associated with SLE, but Prednisolone is the most appropriate initial treatment for this patient's overall condition. The use of other immunosuppressive agents like cyclophosphamide would require more consideration and may be reserved for more severe cases or if Prednisolone alone is insufficient to control the disease.  As always, the management of a patient's medical condition should be carried out by a qualified healthcare professional who can consider the patient's full medical history and perform a comprehensive evaluation before making treatment decisions. |
| Attempt 3  Based on the provided information, the most appropriate initial treatment for the 61-year-old man with ankle swelling, hypertension, seronegative polyarthritis, pitting edema, signs of chronic deforming polyarthropathy, silver wiring and arteriovenous nipping on optic fundi, and laboratory findings indicative of nephrotic syndrome (elevated urinary protein:creatinine ratio, low serum albumin) is E. Prednisolone and cyclophosphamide.  The patient's clinical presentation and laboratory findings suggest the presence of systemic lupus erythematosus (SLE) with associated lupus nephritis. SLE is a chronic autoimmune disease that can affect multiple organ systems, including the kidneys. The combination of polyarthritis, seronegativity, optic fundi findings, and nephrotic syndrome in the setting of long-standing polyarthritis is highly suggestive of SLE.  The initial treatment for lupus nephritis involves the use of glucocorticoids (such as prednisolone) to suppress the immune response and reduce inflammation. Cyclophosphamide, a potent immunosuppressant, is often added to the treatment regimen to further control the autoimmune process and prevent further renal damage.  Option A (Candesartan cilexetil) is an angiotensin receptor blocker (ARB) used to manage hypertension, but it does not address the underlying autoimmune process or nephrotic syndrome in this case.  Option B (Furosemide) is a diuretic used to manage fluid overload, but it does not address the underlying autoimmune process or nephrotic syndrome. |
| **21** | A 75 year old woman has had 5 months of a 2 cm red plaque on her leg. Investigation: Skin biopsy: Bowen's disease  Which is the most appropriate topical treatment?  A. 5-fluorouracil (Efudix ® ) cream  B. Betamethasone valerate (Betnovate ® ) cream  C. Diclofenac (Solaraze ® ) gel  D. Isotretinoin gel  E. Salicylic acid gel | Attempt 1  Based on the diagnosis of Bowen's disease, the most appropriate topical treatment option would be option A. 5-fluorouracil (Efudix®) cream.  Bowen's disease, also known as squamous cell carcinoma in situ, is a precancerous skin condition characterized by the presence of abnormal cells in the outermost layer of the skin (epidermis). It typically presents as a well-defined red plaque or patch that may be scaly or crusted.  5-fluorouracil (5-FU) is a chemotherapy medication that can also be used topically for the treatment of precancerous and cancerous skin lesions. It works by inhibiting the growth of abnormal cells and inducing cell death. When applied to the affected area, 5-FU cream selectively targets and destroys the abnormal cells in Bowen's disease.  The other options listed are not the most appropriate topical treatment for Bowen's disease:  B. Betamethasone valerate (Betnovate®) cream: Betamethasone is a potent corticosteroid commonly used to treat various inflammatory skin conditions. However, it is not typically the first-line treatment for Bowen's disease, as it primarily targets inflammation rather than the abnormal cells themselves.  C. Diclofenac (Solaraze®) gel: Diclofenac is a nonsteroidal anti-inflammatory drug (NSAID) that is sometimes used topically for actinic keratoses, another precancerous skin condition. While it may have some utility in certain cases of Bowen's disease, it is generally not considered the first-line treatment.  D. Isotretinoin gel: Isotretinoin is a retinoid medication primarily used in the treatment of severe acne. Its use in Bowen's disease is not well-established, and it is not typically recommended as the first-line treatment.  E. Salicylic acid gel: Salicylic acid is a keratolytic agent commonly used to treat various skin conditions, such as acne and warts. While it may help with the scaling and thickening of the skin in Bowen's disease, it is not the primary treatment for the abnormal cells themselves.  It is important for the patient to consult with a dermatologist or healthcare professional experienced in dermatology for a thorough evaluation and to discuss the best treatment options based on the individual's specific condition and medical history. |
| Attempt 2  The most appropriate topical treatment for Bowen's disease, a type of intraepidermal squamous cell carcinoma, is A. 5-fluorouracil (Efudix®) cream.  Bowen's disease is a pre-cancerous skin condition characterized by red, scaly, and well-defined plaques. The main goal of treatment is to remove or destroy the abnormal cells on the skin's surface.  5-fluorouracil (5-FU) is a topical chemotherapy agent that interferes with the growth of abnormal cells. It is commonly used to treat Bowen's disease and other precancerous skin conditions. The cream is applied directly to the affected area, and it works by selectively destroying the abnormal cells, allowing healthy skin to regenerate.  Betamethasone valerate (Betnovate®) cream is a topical corticosteroid and is not the most appropriate treatment for Bowen's disease. It is mainly used to reduce inflammation and relieve symptoms associated with certain skin conditions like eczema and psoriasis.  Diclofenac (Solaraze®) gel is a non-steroidal anti-inflammatory drug (NSAID) and is typically used for the treatment of actinic keratoses, another type of precancerous skin lesion, and is not the first-line treatment for Bowen's disease.  Isotretinoin gel is used primarily for the treatment of acne and is not indicated for Bowen's disease.  Salicylic acid gel is commonly used for the treatment of acne, warts, and certain other skin conditions, but it is not the recommended treatment for Bowen's disease.  In summary, the most appropriate topical treatment for Bowen's disease is 5-fluorouracil (Efudix®) cream, as it is specifically designed to target and remove the abnormal cells associated with this condition. However, the final treatment decision should be made in consultation with a dermatologist or healthcare provider, taking into consideration the patient's overall health and medical history. |
| Attempt 3  The most appropriate topical treatment for Bowen's disease, a form of intraepidermal squamous cell carcinoma, is A. 5-fluorouracil (Efudix®) cream.  Bowen's disease is a precancerous skin condition characterized by the presence of squamous cell carcinoma in situ. Topical 5-fluorouracil cream is a commonly used treatment option for Bowen's disease. It is a chemotherapy medication that inhibits DNA synthesis and leads to the destruction of abnormal cells. It is applied topically to the affected area and works by selectively targeting and eliminating the abnormal cells in the epidermis.  Option B (Betamethasone valerate cream) is a topical corticosteroid that is typically used for inflammatory skin conditions and would not be the most appropriate treatment for Bowen's disease.  Option C (Diclofenac gel) is a nonsteroidal anti-inflammatory drug (NSAID) that is sometimes used topically for actinic keratoses, a precancerous skin condition. While similar in appearance to Bowen's disease, actinic keratoses are different entities, and diclofenac gel is not the most appropriate treatment for Bowen's disease.  Option D (Isotretinoin gel) is primarily used for the treatment of severe acne and is not typically indicated for Bowen's disease.  Option E (Salicylic acid gel) is commonly used for the treatment of various skin conditions, such as acne and warts, but it is not the most appropriate treatment for Bowen's disease.  It's important for the patient to consult with a dermatologist for a comprehensive evaluation and discussion of treatment options for Bowen's disease. |
| **22** | A 32 year old woman has had palpitations and hot flushes for 4 weeks. She has noticed a painless swelling in her neck over the same time and her weight has decreased by 2 kg. She gave birth 4 months ago after a normal pregnancy. She is not breastfeeding. Her pulse rate is 120 bpm and BP 140/90 mmHg. She is tremulous and restless. She has a large smooth non-tender goitre. Investigations: Free T4 35.6 pmol/L (9–25) Free T3 10.8 pmol/L (4.0–7.2) TSH <0.01 mU/L (0.3–4.2) Thyroid peroxidase antibodies >1600 IU/L (<50) Thyroid stimulating antibodies <1.0 IU/L (<1.75)  Which is the most appropriate initial treatment?  A. Carbimazole  B. Propranolol  C. Propylthiouracil  D. Thyroidectomy  E. Thyrotropin alfa | Attempt 1  Based on the clinical presentation and laboratory findings, the most appropriate initial treatment for this patient would be option C. Propylthiouracil.  The patient's symptoms, including palpitations, hot flushes, weight loss, tremors, and restlessness, along with the presence of a painless swelling in the neck (large smooth non-tender goiter), suggest hyperthyroidism. The laboratory results further support this diagnosis, with elevated levels of free T4, free T3, and suppressed TSH. The presence of thyroid peroxidase antibodies indicates an autoimmune cause, most likely Graves' disease.  Propylthiouracil is an antithyroid medication that works by inhibiting the production of thyroid hormones. It can be used as initial treatment to help manage the symptoms and normalize thyroid hormone levels. It is particularly suitable for pregnant or lactating women or those who cannot tolerate carbimazole due to side effects.  The other treatment options listed are as follows:  A. Carbimazole: Carbimazole is another antithyroid medication commonly used to treat hyperthyroidism. However, in this case, propylthiouracil is preferred as the initial treatment option.  B. Propranolol: Propranolol is a beta-blocker that can help alleviate the symptoms of hyperthyroidism, such as palpitations and tremors. While it provides symptomatic relief, it does not address the underlying cause and is not considered a definitive treatment for hyperthyroidism.  D. Thyroidectomy: Surgical removal of the thyroid gland (thyroidectomy) is a treatment option for hyperthyroidism, but it is typically reserved for cases that are unresponsive to or have contraindications to antithyroid medications, or in certain specific circumstances. It is not typically the initial treatment choice.  E. Thyrotropin alfa: Thyrotropin alfa, also known as recombinant human thyroid-stimulating hormone (rhTSH), is not the appropriate initial treatment for hyperthyroidism. It is primarily used in diagnostic testing or preparation for radioactive iodine therapy, but not as the primary treatment for hyperthyroidism itself.  It is important for the patient to be under the care of an endocrinologist or healthcare professional experienced in managing thyroid disorders to monitor her progress, adjust the treatment as needed, and provide appropriate follow-up care. |
| Attempt 2  The most appropriate initial treatment for this patient with thyrotoxicosis and a large smooth non-tender goitre is C. Propylthiouracil.  The clinical presentation, laboratory results, and the presence of thyroid peroxidase antibodies are consistent with Graves' disease, an autoimmune disorder causing hyperthyroidism. Propylthiouracil is an antithyroid medication that blocks the synthesis of thyroid hormones and reduces their levels in the bloodstream. It is a suitable choice for initial treatment, especially in cases where carbimazole may not be tolerated or is contraindicated.  Propranolol (B) can be used to manage the symptoms of thyrotoxicosis, such as rapid heart rate (tachycardia) and tremor, but it does not address the underlying thyroid hormone excess.  Carbimazole (A) is another antithyroid medication used to treat hyperthyroidism, and it is generally the first-line treatment in most cases. However, propylthiouracil may be preferred in specific situations.  Thyroidectomy (D) is a surgical option for hyperthyroidism, but it is typically reserved for cases where medical treatment has failed, or in certain situations where surgery is deemed more appropriate.  Thyrotropin alfa (E) is not used as a first-line treatment for hyperthyroidism. It is a synthetic form of thyroid-stimulating hormone (TSH) and is primarily used for diagnostic purposes, such as testing the responsiveness of the thyroid gland after radioiodine treatment.  In conclusion, given the patient's clinical presentation, laboratory results, and the diagnosis of Graves' disease, the most appropriate initial treatment is C. Propylthiouracil. However, the final treatment decision should be made in consultation with an endocrinologist, considering the patient's overall health and individual circumstances. |
| Attempt 3  The most appropriate initial treatment for this patient with hyperthyroidism and a large smooth non-tender goitre is C. Propylthiouracil.  The clinical presentation, including palpitations, hot flushes, weight loss, tremor, and a large smooth non-tender goitre, is suggestive of hyperthyroidism. The laboratory findings of elevated free T4, free T3, and suppressed TSH confirm the diagnosis.  Propylthiouracil (PTU) is an antithyroid medication that inhibits the production of thyroid hormones. It blocks the synthesis of thyroid hormones by interfering with the conversion of T4 to T3 in peripheral tissues and by inhibiting the activity of thyroid peroxidase, an enzyme involved in thyroid hormone synthesis. PTU is effective in controlling the symptoms of hyperthyroidism and can be used as initial treatment.  Carbimazole is another antithyroid medication that is commonly used in the treatment of hyperthyroidism. However, propylthiouracil is preferred in this scenario due to the patient's recent pregnancy. Carbimazole has the potential to cross the placenta and can pose a risk of fetal hypothyroidism. Therefore, propylthiouracil is the preferred choice in this case.  Propranolol, a beta-blocker, can provide symptomatic relief by controlling the heart rate and tremor associated with hyperthyroidism, but it does not address the underlying thyroid hormone excess and is not the most appropriate initial treatment.  Thyroidectomy (surgical removal of the thyroid gland) is an option for patients with hyperthyroidism who do not respond to or have contraindications to antithyroid medications, or in cases of large goitres causing compressive symptoms. However, it is not the most appropriate initial treatment in this patient.  Thyrotropin alfa (recombinant human thyroid-stimulating hormone) is not used as initial treatment for hyperthyroidism. It is typically used in diagnostic procedures, such as radioactive iodine uptake tests or thyroglobulin testing.  It is important for the patient to be managed by an endocrinologist or an appropriate healthcare professional for further evaluation, treatment, and monitoring of her hyperthyroidism. |
| **23** | An 80 year old man has an ulcer over the left heel and reduced mobility. He has a loss of appetite. He has type 2 diabetes mellitus and has previously had a myocardial infarction. The ulcer is 3 cm in diameter and deeply penetrating. Sensory testing shows reduced vibration sense but normal sensation to light touch. His Doppler ratio (ankle brachial pressure index) on the left is 0.68 and on the right is 0.98 (normal value 1.00).  Which is the most likely mechanism of his ulcer?  A. Arterial  B. Neuropathic  C. Nutritional  D. Vasculitic  E. Venous | Attempt 1  Based on the information provided, the most likely mechanism of the ulcer in this case is option A. Arterial.  The patient's clinical history, including reduced mobility, type 2 diabetes mellitus, previous myocardial infarction, and sensory testing showing reduced vibration sense (indicating peripheral neuropathy), suggests that he is at risk for peripheral arterial disease (PAD). The presence of an ulcer that is deeply penetrating and the abnormal Doppler ratio (ankle brachial pressure index) on the left side (0.68) further support an arterial etiology.  Arterial ulcers typically occur due to inadequate blood supply to the affected area, resulting in tissue ischemia and subsequent breakdown. Risk factors for arterial ulcers include atherosclerosis, diabetes mellitus, peripheral neuropathy, and previous vascular events like myocardial infarction.  The other options listed are as follows:  B. Neuropathic: While the patient has peripheral neuropathy as indicated by reduced vibration sense, the characteristics of the ulcer, such as being deeply penetrating and associated with reduced arterial blood supply, are more suggestive of an arterial mechanism rather than a pure neuropathic cause.  C. Nutritional: Nutritional ulcers, such as those caused by deficiencies in vitamins (e.g., vitamin C) or minerals, typically present differently and are not the most likely mechanism in this case.  D. Vasculitic: Vasculitic ulcers occur as a result of inflammation and damage to blood vessels. While they can cause non-healing ulcers, the clinical features and risk factors in this patient make an arterial mechanism more likely.  E. Venous: Venous ulcers typically occur in the lower extremities and are associated with venous insufficiency, which presents with symptoms like leg swelling, varicose veins, and aching pain. The characteristics of the ulcer and the abnormal Doppler ratio in this case are more consistent with an arterial etiology rather than venous insufficiency.  It is important for the patient to be evaluated and managed by a healthcare professional, such as a vascular specialist or wound care specialist, to address the underlying arterial insufficiency and optimize wound healing. |
| Attempt 2  The most likely mechanism of the ulcer in this 80-year-old man is A. Arterial.  The clinical presentation and findings point towards an arterial ulcer. The risk factors such as reduced mobility, type 2 diabetes mellitus, and a history of myocardial infarction suggest atherosclerosis, which can lead to arterial insufficiency and impaired blood flow to the lower extremities. The reduced ankle brachial pressure index (Doppler ratio) on the left (0.68) indicates decreased blood flow to the affected leg, supporting the arterial involvement.  Arterial ulcers typically occur in areas with reduced blood supply, such as the lower limbs, especially in patients with atherosclerosis, peripheral arterial disease (PAD), or other vascular issues. The ulcer is often deep and painful, with surrounding features such as cool skin, diminished or absent pulses, and delayed wound healing.  The other options are less likely in this case:  B. Neuropathic ulcers are commonly seen in patients with peripheral neuropathy, which often presents with sensory loss to light touch and preserved vibration sense. Neuropathic ulcers are typically painless and occur due to repetitive trauma in areas of sensory loss.  C. Nutritional ulcers are not likely to cause deep penetrating ulcers over the heel, and they are more commonly seen in areas exposed to pressure and friction, such as the sacrum.  D. Vasculitic ulcers result from inflammation of the blood vessels, but they are less common compared to arterial ulcers, and the clinical presentation in this case does not strongly suggest a vasculitic etiology.  E. Venous ulcers are associated with chronic venous insufficiency and are typically found around the lower legs and ankles. They usually have a superficial appearance with exudative features, but the clinical features described in the case point more towards arterial involvement.  Overall, the most likely mechanism of the ulcer in this patient is arterial insufficiency due to atherosclerosis and peripheral arterial disease. |
| Attempt 3  The most likely mechanism of the ulcer in this case is A. Arterial.  The patient's clinical history, including reduced mobility, type 2 diabetes mellitus, and a previous myocardial infarction, along with the characteristics of the ulcer (deeply penetrating, reduced sensation to vibration, and abnormal ankle brachial pressure index), suggest that the ulcer is likely due to arterial insufficiency.  Arterial insufficiency is commonly seen in individuals with peripheral arterial disease (PAD), which can be associated with atherosclerosis, diabetes mellitus, and other cardiovascular risk factors. Reduced blood flow to the lower extremities leads to tissue ischemia and impaired wound healing, making patients more susceptible to the development of ulcers, particularly over bony prominences or areas of pressure.  Neuropathic ulcers (Option B) are typically seen in individuals with peripheral neuropathy, such as in diabetic neuropathy. They often occur over weight-bearing areas and are associated with loss of protective sensation. However, in this case, the patient's reduced sensation is limited to vibration, and there is no mention of other signs of peripheral neuropathy.  Nutritional ulcers (Option C) are usually seen in individuals with malnutrition or specific vitamin deficiencies. They are typically shallow and present with surrounding skin changes. The clinical presentation in this case is not suggestive of a nutritional etiology.  Vasculitic ulcers (Option D) occur due to inflammation of blood vessels, often as a result of systemic vasculitis. This patient's history and clinical presentation are not consistent with a vasculitic process.  Venous ulcers (Option E) are associated with chronic venous insufficiency and are typically located around the medial or lateral malleoli. The patient's symptoms and characteristics of the ulcer, including reduced sensation to vibration and an abnormal ankle brachial pressure index, are not consistent with venous insufficiency.  It is important for the patient to be evaluated and managed by a healthcare professional experienced in wound |
| **24** | A 73 year old man is in hospital with a chest infection. He has several episodes of confusion, anxiety and aggression, during which he attempts to leave the hospital. He is convinced he is being 'spied on' by the doctors and nurses and insists that 'cameras have been installed in my room'. These episodes alternate with periods of marked lethargy, which become more pronounced towards the evening. His temperature is 37.8°C, pulse rate 100 bpm, BP 110/73 mmHg and respiratory rate 12 breaths per minute.  Which is the most likely diagnosis?  A. Alzheimer's dementia  B. Bipolar disorder  C. Delirium  D. Lewy body dementia  E. Schizophrenia | Attempt 1  Based on the given information, the most likely diagnosis for this patient is option C. Delirium.  Delirium is an acute and fluctuating change in mental status characterized by disturbances in attention, awareness, and cognition. It often occurs in the setting of an underlying medical condition, such as infection or medication side effects. The patient in this case has a chest infection, which could contribute to the development of delirium.  The key features that support the diagnosis of delirium in this patient are the acute onset of confusion, anxiety, aggression, and delusions (believing he is being spied on), as well as attempts to leave the hospital. The fluctuation between periods of confusion and lethargy, particularly worsening in the evening (sundowning), is also characteristic of delirium.  The other options listed are as follows:  A. Alzheimer's dementia: Alzheimer's dementia is a chronic and progressive neurodegenerative disorder characterized by gradual cognitive decline. While some behavioral disturbances can occur in Alzheimer's dementia, the acute and fluctuating nature of symptoms described in this case is not consistent with this diagnosis.  B. Bipolar disorder: Bipolar disorder is a mood disorder characterized by episodes of depression and mania. While bipolar disorder can present with mood swings, the presence of confusion, delusions, and fluctuations in mental status as described in this case are more indicative of delirium rather than bipolar disorder.  D. Lewy body dementia: Lewy body dementia is a neurodegenerative disorder characterized by cognitive decline, visual hallucinations, parkinsonism, and fluctuations in cognition. While some features overlap with the symptoms described in this case, such as fluctuations in mental status and visual hallucinations, the acute onset and presence of a chest infection are more suggestive of delirium.  E. Schizophrenia: Schizophrenia is a chronic psychiatric disorder characterized by the presence of positive symptoms (e.g., hallucinations, delusions) and negative symptoms (e.g., flattened affect, social withdrawal). The acute onset, fluctuations, and association with a chest infection are not typical of schizophrenia.  It is crucial to promptly identify and address the underlying cause of delirium, such as the chest infection in this patient. Managing the infection and providing supportive care, including maintaining a calm and safe environment, can help improve the symptoms of delirium. Additionally, the patient should be evaluated by a healthcare professional experienced in managing delirium to ensure appropriate management and monitoring. |
| Attempt 2  The most likely diagnosis for the 73-year-old man with a chest infection and alternating episodes of confusion, anxiety, aggression, and marked lethargy is C. Delirium.  Delirium is a common and acute neuropsychiatric syndrome characterized by disturbances in attention, awareness, and cognition. It often occurs in the setting of an underlying medical condition, such as an infection, and can be precipitated or worsened by hospitalization and medications.  The key features in this case that suggest delirium are:  1. Presence of an acute medical condition (chest infection).  2. Fluctuating course of symptoms, with periods of confusion, anxiety, and aggression alternating with marked lethargy.  3. Delusions and paranoia (e.g., believing he is being spied on and cameras are installed in his room).  4. Elevated temperature, which can be a sign of infection.  5. Age of the patient (73 years old), as delirium is more common in older individuals.  Delirium is often reversible once the underlying medical condition is addressed and appropriate treatment is provided. It requires urgent evaluation and management to prevent complications and ensure patient safety.  The other options are less likely in this case:  A. Alzheimer's dementia: Alzheimer's dementia is a chronic and progressive neurodegenerative disorder. While it can cause cognitive and behavioral changes, it typically has a more insidious onset and a gradual decline in cognitive function, which is different from the acute and fluctuating symptoms seen in delirium.  B. Bipolar disorder: Bipolar disorder is a mood disorder characterized by episodes of mania and depression. It does not typically present with acute confusion and delusional thinking like what is seen in this case.  D. Lewy body dementia: Lewy body dementia is characterized by cognitive decline, visual hallucinations, and parkinsonism. While delirium can occur in patients with Lewy body dementia, the presence of an acute medical condition (chest infection) makes delirium more likely.  E. Schizophrenia: Schizophrenia is a chronic psychiatric disorder characterized by positive symptoms (hallucinations, delusions) and negative symptoms (flat affect, social withdrawal). Delirium is an acute and reversible condition, whereas schizophrenia has a more chronic course.  Overall, given the clinical presentation and the patient's medical condition, delirium is the most likely diagnosis. |
| Attempt 3  The most likely diagnosis in this case is C. Delirium.  Delirium is an acute confusional state characterized by a disturbance in attention and awareness. It is often caused by an underlying medical condition, such as an infection or medication side effects, and is commonly seen in older adults, particularly those in a hospital setting.  The patient's symptoms of confusion, anxiety, aggression, delusional beliefs (thinking he is being spied on), and fluctuations in level of consciousness are consistent with delirium. The presence of a chest infection suggests that the delirium may be due to an underlying medical condition.  Alzheimer's dementia (Option A) is a chronic, progressive neurodegenerative disorder characterized by memory loss and cognitive decline. It does not typically present with acute episodes of confusion and delusions.  B |
| **25** | A 78 year old woman is admitted to the surgical unit with a suspected vesicocolic fistula. She has a history of hypertension, type 2 diabetes mellitus and angina. She is taking amlodipine, metformin, gliclazide, simvastatin and bisoprolol. Her serum creatinine is 120 μmol/L (60–120). The consultant surgeon requests a CT scan of abdomen with contrast.  Which medication should be stopped before her CT scan?  A. Amlodipine  B. Bisoprolol  C. Gliclazide  D. Metformin  E. Simvastatin | Attempt 1  The medication that should be stopped before the CT scan with contrast in this patient is option D. Metformin.  Metformin is an oral antidiabetic medication commonly used to treat type 2 diabetes. However, it can pose a risk of a rare but potentially serious side effect called lactic acidosis when administered in the setting of impaired kidney function or contrast administration. Since the patient's serum creatinine is at the upper limit of the normal range (120 μmol/L), it indicates mild renal impairment, and there is a concern for contrast-induced nephropathy.  Contrast-induced nephropathy is a form of acute kidney injury that can occur after the administration of contrast agents used in imaging procedures such as CT scans. The risk of developing this complication is higher in patients with pre-existing renal impairment. Since metformin is primarily excreted through the kidneys, it is necessary to temporarily discontinue it before the CT scan to minimize the risk of lactic acidosis.  The other options listed are as follows:  A. Amlodipine: Amlodipine is a calcium channel blocker used to treat hypertension and angina. It does not need to be stopped before the CT scan.  B. Bisoprolol: Bisoprolol is a beta-blocker commonly used in the management of hypertension and angina. It does not need to be stopped before the CT scan.  C. Gliclazide: Gliclazide is an oral antidiabetic medication. While it is important to monitor blood glucose levels during the fasting period before the CT scan, it does not need to be stopped.  E. Simvastatin: Simvastatin is a statin medication used to manage high cholesterol levels. It does not need to be stopped before the CT scan.  It is essential for the patient to follow the instructions provided by the healthcare team regarding the temporary discontinuation of metformin, as well as any other pre-scan preparations. The decision to stop and restart metformin should be made in consultation with the healthcare provider managing the patient's diabetes. |
| Attempt 2  Before a CT scan with contrast, it is important to consider the risk of contrast-induced nephropathy, especially in patients with pre-existing renal impairment. In this case, the patient's serum creatinine level is at the upper limit of normal (120 μmol/L), which suggests some degree of renal impairment. Among the medications listed, the one that poses the greatest risk for contrast-induced nephropathy is:  D. Metformin  Metformin is an oral antidiabetic medication commonly used in the treatment of type 2 diabetes. It is excreted primarily by the kidneys, and its use in patients with renal impairment can increase the risk of lactic acidosis, particularly in the setting of contrast administration. Contrast-induced nephropathy can further worsen renal function and increase the risk of lactic acidosis with metformin use.  Therefore, metformin should be stopped before the CT scan and withheld for at least 48 hours after the procedure, as long as the patient's renal function remains stable and there are no signs of contrast-induced nephropathy. Alternative measures for glycemic control should be considered during this period to manage the patient's diabetes.  The other medications listed (A. Amlodipine, B. Bisoprolol, C. Gliclazide, and E. Simvastatin) do not pose the same risk of contrast-induced nephropathy and do not need to be stopped before the CT scan. However, it is always important to review the patient's complete medication list and consider any other factors that may influence the use of contrast agents or the safety of other medications during the procedure. |
| Attempt 3  The medication that should be stopped before the CT scan with contrast is D. Metformin.  Metformin is an oral antidiabetic medication commonly used in the management of type 2 diabetes. However, it can increase the risk of a rare but serious side effect called lactic acidosis, particularly in patients with impaired renal function. The presence of a serum creatinine level at the upper limit of the normal range suggests some degree of renal impairment in this patient.  Contrast agents used in imaging studies, such as CT scans, can further stress the kidneys and potentially increase the risk of contrast-induced nephropathy. When metformin is combined with contrast agents, there is a potential for additive renal toxicity, which can increase the risk of lactic acidosis.  Therefore, it is generally recommended to temporarily stop metformin before a CT scan with contrast in patients with renal impairment to minimize the risk. The decision to discontinue metformin should be made in consultation with the patient's healthcare provider, who can provide specific guidance based on the patient's individual circumstances. In this case, the patient's serum creatinine level of 120 µmol/L suggests some degree of renal impairment, making it appropriate to stop metformin before the CT scan. |
| **26** | A 50 year old man has a 3 month history of right loin pain and weight loss. For the past 20 years, he has smoked ten cigarettes per day. His temperature is 37.4°C, pulse rate is 72 bpm and BP is 142/74 mmHg. Investigations: Haemoglobin 11.2 g/L (130–175) Platelets 340 × 109/L (150–400) White cell count 10.1 × 109/L (4.0–11.0) Urinalysis blood 3+  Which is the most likely diagnosis?  A. Benign prostatic hypertrophy  B. Pyelonephritis  C. Renal calculus  D. Renal cancer  E. Urinary tract infection | Attempt 1  Based on the information provided, the most likely diagnosis for this patient is option D. Renal cancer.  The patient's symptoms of right loin pain and weight loss, along with the presence of hematuria (blood in the urine), raise suspicion for renal cancer. Risk factors such as a history of smoking and the duration of symptoms further support this possibility.  The laboratory findings of a decreased hemoglobin level (11.2 g/L) may suggest anemia, which can be associated with renal cancer due to chronic blood loss in the urine. The platelet and white cell counts are within the normal range and do not provide specific clues for a particular diagnosis.  The other options listed are as follows:  A. Benign prostatic hypertrophy (BPH): BPH typically presents with lower urinary tract symptoms such as urinary frequency, urgency, hesitancy, and weak urine flow. It is less likely to cause loin pain and weight loss as described in this case.  B. Pyelonephritis: Pyelonephritis is a kidney infection that can cause fever, flank pain, and urinary symptoms. However, weight loss is less commonly associated with pyelonephritis, and the presence of hematuria raises concern for a more serious underlying condition such as renal cancer.  C. Renal calculus: Renal calculi, or kidney stones, can cause severe loin pain. However, weight loss is not typically associated with renal calculi, and the presence of persistent hematuria should prompt consideration of other causes.  E. Urinary tract infection (UTI): While UTIs can cause symptoms such as urinary frequency, urgency, and dysuria, the presence of loin pain, weight loss, and persistent hematuria make a UTI less likely as the sole explanation for the patient's presentation.  Given the concerning symptoms, it is important for the patient to undergo further evaluation, such as imaging studies (e.g., CT scan) and urological referral, to confirm the diagnosis of renal cancer and initiate appropriate management. |
| Attempt 2  Given the patient's age, history of smoking, and the presence of right loin pain and weight loss, the most likely diagnosis among the options provided is:  D. Renal cancer  Renal cancer, also known as renal cell carcinoma, is a malignancy that originates from the cells of the renal tubules in the kidneys. It commonly presents with symptoms like flank pain, weight loss, and sometimes hematuria (blood in the urine). The presence of blood (3+) in the urinalysis raises concern for a possible renal tumor.  While the other options (A. Benign prostatic hypertrophy, B. Pyelonephritis, C. Renal calculus, and E. Urinary tract infection) may cause similar symptoms, the combination of age, smoking history, and the presence of blood in the urine is most suggestive of renal cancer in this case.  It is important for the patient to undergo further evaluation, including imaging studies (such as CT scan or ultrasound) and possibly a biopsy to confirm the diagnosis of renal cancer and determine the extent of the disease. Early detection and appropriate management are crucial for better outcomes in cases of renal cancer. |
| Attempt 3  Based on the provided information, the most likely diagnosis in this case is D. Renal cancer.  Several factors point towards renal cancer as the likely diagnosis:  1. The presence of right loin pain: Loin pain can be a symptom of renal cancer, especially if it is persistent and associated with other concerning factors.  2. Weight loss: Unintentional weight loss is often associated with malignancies, including renal cancer.  3. Smoking history: Smoking is a well-established risk factor for the development of renal cancer.  4. Hematuria: The presence of blood (3+) in the urine can be a sign of renal cancer. Hematuria may be visible (macroscopic) or only detected on urine analysis (microscopic).  Although other conditions such as pyelonephritis, renal calculus, and urinary tract infection can also present with similar symptoms, the combination of right loin pain, weight loss, and hematuria raises a higher suspicion of renal cancer, especially given the patient's smoking history.  It's important to note that a definitive diagnosis can only be made through further investigations, such as imaging studies (e.g., CT scan, ultrasound) and possibly a biopsy. Therefore, prompt medical evaluation and follow-up with appropriate specialists are essential to confirm the diagnosis and initiate appropriate management. |
| **27** | A 74 year old man with type 2 diabetes has been increasingly unwell and experiencing progressive thirst and nausea for 2 weeks. Initially he described needing to pass urine more frequently than usual, but now he has not passed urine for 24 hours. He is dehydrated. Investigations: Sodium 149 mmol/L (135–146) Potassium 5.2 mmol/L (3.5–5.3) Chloride 101 mmol/L (95–106) Urea 15.4 mmol/L (2.5–7.8) Creatinine 208 μmol/L (60–120) Fasting glucose 41.7 mmol/L (3.0–6.0)  Which is the calculated serum osmolality?  A. 206.1 mmol/L  B. 255.2 mmol/L  C. 312.3 mmol/L  D. 355.1 mmol/L  E. Impossible to calculate, more information needed | Attempt 1  To calculate the serum osmolality, we can use the formula:  Serum osmolality (mOsm/kg) = 2 × ([Na] + [K]) + glucose + urea  In this case, the values provided are:  Sodium ([Na]) = 149 mmol/L  Potassium ([K]) = 5.2 mmol/L  Glucose = 41.7 mmol/L  Urea = 15.4 mmol/L  Plugging in these values into the formula, we get:  Serum osmolality = 2 × (149 + 5.2) + 41.7 + 15.4  Serum osmolality = 2 × 154.2 + 41.7 + 15.4  Serum osmolality = 308.4 + 41.7 + 15.4  Serum osmolality = 365.5 mmol/L  Therefore, the calculated serum osmolality is approximately 365.5 mmol/L.  The closest option to this value is option D. 355.1 mmol/L. |
| Attempt 2  Let's calculate the serum osmolality again using the correct formula:  Serum Osmolality (mOsm/kg) = 2(Na) + glucose/18 + BUN/2.8  Given values:  Sodium (Na) = 149 mmol/L  Glucose = 41.7 mmol/L  BUN = 15.4 mmol/L  Serum Osmolality = 2(149) + 41.7/18 + 15.4/2.8  Now, calculate:  Serum Osmolality ≈ 298 + 2.316 + 5.5 ≈ 305.816 mOsm/kg  The calculated serum osmolality is approximately 305.816 mOsm/kg.  Now, let's check which of the provided options is closest to the calculated value:  A. 206.1 mmol/L (This is too low and does not match the calculated value)  B. 255.2 mmol/L (This is too low and does not match the calculated value)  C. 312.3 mmol/L (This is too high and does not match the calculated value)  D. 355.1 mmol/L (This is too high and does not match the calculated value)  E. Impossible to calculate, more information needed (This is not correct; we were able to calculate the serum osmolality)  None of the provided options exactly match the calculated value, but the closest one is:  B. 255.2 mmol/L  However, the correct answer should be closer to 305.8 mOsm/kg, so none of the given options are entirely accurate. |
| Attempt 3  To calculate the serum osmolality, we can use the following formula:  Serum Osmolality (mOsm/kg) = 2(Na) + glucose/18 + urea/2.8  Plugging in the values provided:  Na = 149 mmol/L  Glucose = 41.7 mmol/L  Urea = 15.4 mmol/L  Serum Osmolality = 2(149) + 41.7/18 + 15.4/2.8  Calculating this equation:  Serum Osmolality = 298 + 2.317 + 5.5  Serum Osmolality = 305.817 mOsm/kg  Therefore, the calculated serum osmolality is approximately 305.8 mmol/L.  The correct answer is not among the options given, and it seems that the calculated osmolality was rounded incorrectly. |
| **28** | A 65 year old man receives a renal transplant. He is transferred back to the ward after four hours in recovery. His pulse is 106 bpm regular, BP 110/70 mmHg and respiratory rate 18 breaths per minute. His chest is clear on auscultation. His urine output has been 15–20 mL per hour while in recovery. Drain output has been 120 mL since surgery. Investigations: Haemoglobin 90 g/L (130–175) (preoperative level 103 g/L) Sodium 142 mmol/L (135–146) Potassium 5.8 mmol/L (3.5–5.3) Urea 31.9 mmol/L (2.5–7.8) Creatinine 590 μmol/L (60–120)  Which is the next most appropriate management step?  A. Blood transfusion  B. Fluid challenge  C. Furosemide  D. Haemofiltration  E. Insulin and dextrose infusion | Attempt 1  The next most appropriate management step for this patient is option D. Haemofiltration.  The patient's clinical presentation, including decreased urine output (<0.5 mL/kg/h), elevated creatinine (590 μmol/L), and deranged electrolyte levels (elevated potassium and urea), suggests acute kidney injury (AKI) following renal transplant. These findings indicate that the transplanted kidney is not functioning adequately to maintain normal kidney function.  Given the severity of the AKI and the associated electrolyte abnormalities, the most appropriate management step is to initiate renal replacement therapy (RRT) such as haemofiltration. Haemofiltration is a form of continuous renal replacement therapy (CRRT) that helps remove excess fluids, urea, and other waste products from the blood in patients with acute kidney injury.  The other options listed are as follows:  A. Blood transfusion: The patient's low hemoglobin level (90 g/L) may indicate anemia, but transfusion alone would not address the underlying cause of the acute kidney injury. The primary focus should be on managing the renal dysfunction.  B. Fluid challenge: The patient is already receiving adequate fluids and has a normal blood pressure. A fluid challenge may further worsen fluid overload and does not address the underlying cause of the acute kidney injury.  C. Furosemide: Furosemide is a diuretic that promotes urine output. However, in the context of acute kidney injury, the effectiveness of diuretics is often limited. Furthermore, the patient is already experiencing fluid and electrolyte imbalances, and furosemide may exacerbate these abnormalities.  E. Insulin and dextrose infusion: Insulin and dextrose infusion is typically used in the management of hyperkalemia, but it does not address the underlying cause of the acute kidney injury. In this case, the primary concern is the initiation of renal replacement therapy to provide adequate renal support.  It is important to involve a nephrologist or a specialist in the management of renal transplant patients for further evaluation and guidance in managing the patient's acute kidney injury. |
| Attempt 2  The patient has a low hemoglobin level (90 g/L) and elevated serum urea (31.9 mmol/L) and creatinine (590 μmol/L), which indicates acute kidney injury (AKI) following the renal transplant.  Given the low urine output (15-20 mL per hour) and high creatinine level, the most appropriate management step would be to initiate fluid challenge (Option B). A fluid challenge involves administering a bolus of intravenous fluids to improve kidney perfusion and urine output. This can help correct the intravascular volume depletion and improve kidney function in the immediate postoperative period.  Options A, D, and E are not the immediate management steps for improving kidney perfusion. Blood transfusion (Option A) may be considered later if the patient remains anemic. Haemofiltration (Option D) is a more advanced form of renal replacement therapy and is not the first-line treatment in this scenario. Insulin and dextrose infusion (Option E) may be used to treat hyperkalemia if present, but it does not address the underlying issue of kidney perfusion.  Option C (Furosemide) would be contraindicated as it may worsen the patient's kidney function in the setting of hypovolemia and decreased urine output.  Therefore, the next most appropriate management step is to initiate a fluid challenge (Option B) to improve kidney perfusion and urine output. |
| Attempt 3  The given scenario describes a patient who has undergone a renal transplant and is now experiencing decreased urine output (oliguria) and elevated creatinine levels, indicating impaired kidney function. This suggests the possibility of acute kidney injury (AKI) following the transplant.  In this situation, the next most appropriate management step would be a fluid challenge (Option B). A fluid challenge involves administering a bolus of intravenous fluids to assess the patient's response and improve renal perfusion. It aims to increase urine output and improve kidney function.  Administering a blood transfusion (Option A) may be considered if the patient's hemoglobin level drops significantly and they become symptomatic, but it is not the immediate management priority in this case.  Furosemide (Option C) is a diuretic that could be used to promote diuresis in certain situations, but it may not be effective in cases of AKI. It is not the primary management step in this scenario.  Haemofiltration (Option D) is a renal replacement therapy that may be considered if the patient's renal function does not improve with other interventions. However, it is not the initial step and is typically reserved for more severe cases of AKI.  Insulin and dextrose infusion (Option E) is not indicated in this scenario unless there is evidence of hyperkalemia requiring urgent management, which is not mentioned in the given information.  Therefore, the most appropriate next management step in this case is a fluid challenge (Option B). |
| **29** | A 70 year old man has a sharp stabbing pain in his jaw and cheek that lasts for seconds. He reports that the pain is triggered when brushing his teeth, cold wind and touching his face.  Which is the most appropriate treatment?  A. Carbamazepine  B. Indometacin  C. Morphine  D. Prednisolone  E. Pregabalin | Attempt 1  The most appropriate treatment for the described symptoms is option A. Carbamazepine.  The patient's symptoms of sharp stabbing pain in the jaw and cheek that is triggered by specific stimuli (such as brushing teeth, cold wind, and touching the face) are consistent with trigeminal neuralgia. Trigeminal neuralgia is characterized by sudden, severe facial pain that is often described as electric shock-like or stabbing in nature.  Carbamazepine is the first-line treatment for trigeminal neuralgia. It is an anticonvulsant medication that helps to relieve the neuropathic pain associated with this condition. Carbamazepine works by reducing the abnormal firing of nerve signals that contribute to the pain.  The other options listed are as follows:  B. Indometacin: Indometacin is a nonsteroidal anti-inflammatory drug (NSAID) that is primarily used for its anti-inflammatory properties. However, it is not typically effective in managing the neuropathic pain associated with trigeminal neuralgia.  C. Morphine: Morphine is a potent opioid analgesic that is commonly used for moderate to severe pain. However, it is not considered the first-line treatment for trigeminal neuralgia, and other medications, such as carbamazepine, are more effective for this specific condition.  D. Prednisolone: Prednisolone is a corticosteroid that is often used for its anti-inflammatory and immunosuppressive effects. However, in the case of trigeminal neuralgia, there is no clear evidence supporting the use of corticosteroids as the primary treatment.  E. Pregabalin: Pregabalin is an anticonvulsant medication that is commonly used for the management of neuropathic pain. While it may be effective for some types of neuropathic pain, carbamazepine is the preferred first-line treatment for trigeminal neuralgia.  It is important for the patient to be evaluated and prescribed the appropriate dosage of carbamazepine by a healthcare professional experienced in managing trigeminal neuralgia. Regular follow-up is also necessary to monitor the response to treatment and make any necessary adjustments. |
| Attempt 2  The symptoms described by the patient are characteristic of trigeminal neuralgia, which is a neuropathic pain condition involving the trigeminal nerve. The pain is sharp, stabbing, and triggered by certain actions like brushing teeth, cold wind, and touching the face.  The most appropriate treatment for trigeminal neuralgia is carbamazepine (Option A). Carbamazepine is an anticonvulsant drug that is effective in relieving the pain associated with trigeminal neuralgia. It helps in reducing the hyperactivity of the trigeminal nerve, which is responsible for the episodes of intense pain.  Options B (Indometacin) and C (Morphine) are not considered first-line treatments for trigeminal neuralgia. Indometacin is a nonsteroidal anti-inflammatory drug (NSAID) that is not typically used for this condition, and morphine is an opioid that is not effective in treating neuropathic pain like trigeminal neuralgia.  Option D (Prednisolone) is a corticosteroid, and while it may have some anti-inflammatory effects, it is not considered a first-line treatment for trigeminal neuralgia.  Option E (Pregabalin) is another anticonvulsant medication that is sometimes used as an alternative to carbamazepine for treating trigeminal neuralgia. However, carbamazepine is generally considered the first-line treatment due to its proven efficacy.  Therefore, the most appropriate treatment for the patient's trigeminal neuralgia is carbamazepine (Option A). |
| Attempt 3  The described symptoms are suggestive of trigeminal neuralgia, a condition characterized by sudden, severe facial pain that is typically triggered by specific activities or stimuli. The most appropriate treatment for trigeminal neuralgia is carbamazepine (Option A). Carbamazepine is an anticonvulsant medication that is effective in reducing the frequency and intensity of the pain episodes in trigeminal neuralgia. It is considered the first-line treatment for this condition.  Indometacin (Option B) is a nonsteroidal anti-inflammatory drug (NSAID) that may be used in some cases of facial pain, but it is not typically the treatment of choice for trigeminal neuralgia.  Morphine (Option C) is a potent opioid analgesic and is not typically used as a first-line treatment for trigeminal neuralgia. It may be considered in certain cases when other treatments have failed to provide relief.  Prednisolone (Option D) is a corticosteroid and may be used in certain types of facial pain conditions, but it is not the primary treatment for trigeminal neuralgia.  Pregabalin (Option E) is an anticonvulsant medication that has been used in the management of neuropathic pain, including trigeminal neuralgia. However, it is not considered the first-line treatment and is often reserved for cases that do not respond adequately to carbamazepine or have contr |
| **30** | A 64 year old man has developed a tremor in both arms over the last 6 months. It is worse on the right. He also reports difficulty sleeping due to restlessness. He appears emotionally flat and has a tremor at rest that is alleviated on movement.  Which neurotransmitter is most likely to be deficient?  A. Acetylcholine  B. Dopamine  C. Glycine  D. Norepinephrine (noradrenaline)  E. Serotonin | Attempt 1  The neurotransmitter most likely to be deficient in this case is option B. Dopamine.  The patient's symptoms of tremor, particularly at rest and worsened on the right side, along with difficulty sleeping due to restlessness, suggest a possible diagnosis of Parkinson's disease. Parkinson's disease is a neurodegenerative disorder characterized by the progressive loss of dopaminergic neurons in the substantia nigra of the brain.  Dopamine is an important neurotransmitter involved in the regulation of movement, mood, sleep, and motivation. The loss of dopamine-producing neurons in Parkinson's disease leads to a deficiency of dopamine in the brain, resulting in the characteristic motor symptoms such as tremors, rigidity, and bradykinesia (slowness of movement). The emotional flatness or decreased facial expression, known as hypomimia, is also associated with dopamine deficiency in Parkinson's disease.  The other options listed are as follows:  A. Acetylcholine: Acetylcholine is not typically deficient in Parkinson's disease. In fact, the imbalance between dopamine and acetylcholine, with relatively increased acetylcholine activity, is believed to contribute to the motor symptoms of Parkinson's disease.  C. Glycine: Glycine is an inhibitory neurotransmitter primarily involved in the spinal cord and brainstem. It is not directly related to the symptoms described in this case.  D. Norepinephrine (noradrenaline): Norepinephrine is a neurotransmitter involved in the regulation of arousal, attention, and mood. While norepinephrine dysfunction can occur in certain neurological and psychiatric conditions, it is not primarily associated with the motor symptoms seen in Parkinson's disease.  E. Serotonin: Serotonin is a neurotransmitter involved in the regulation of mood, appetite, and sleep, among other functions. While serotonin dysfunction can contribute to various mood and sleep disorders, it is not the primary neurotransmitter implicated in the motor symptoms of Parkinson's disease.  It is important for the patient to be evaluated by a healthcare professional, such as a neurologist, for a comprehensive assessment and proper diagnosis. Treatment options, including dopaminergic medications, can be considered to manage the symptoms and improve the patient's quality of life. |
| Attempt 2  Based on the symptoms described, the most likely neurotransmitter to be deficient in this case is B. Dopamine.  The combination of resting tremor, difficulty sleeping due to restlessness, and emotional flatness are classic symptoms of Parkinson's disease, a neurodegenerative disorder that primarily involves the loss of dopamine-producing neurons in the substantia nigra region of the brain. Dopamine is a neurotransmitter that plays a crucial role in regulating movement, mood, and sleep.  The tremor at rest that is alleviated on movement is a hallmark sign of Parkinson's disease and is caused by the degeneration of dopaminergic neurons, leading to an imbalance between dopamine and other neurotransmitters in the brain.  The other neurotransmitters listed (Acetylcholine, Glycine, Norepinephrine, and Serotonin) are not primarily associated with the symptoms and characteristics described in this case. |
| Attempt 3  The clinical presentation described suggests a parkinsonian syndrome, which is commonly associated with a deficiency of dopamine (Option B) in the brain. Parkinson's disease is the most common cause of parkinsonian syndrome, characterized by resting tremor, bradykinesia (slowness of movement), rigidity, and postural instability.  Dopamine is a neurotransmitter involved in various functions, including movement control. In Parkinson's disease, there is a degeneration of dopamine-producing cells in the substantia nigra, leading to a deficiency of dopamine in the basal ganglia, a region of the brain involved in motor control.  While other neurotransmitters, such as acetylcholine, norepinephrine, and serotonin, also play important roles in the central nervous system, dopamine deficiency is specifically associated with the motor symptoms seen in parkinsonian syndromes. |
| **31** | An 85 year old man is admitted from a nursing home with a spreading cellulitis originating from an ulcer over his right ankle. Cultures taken from the ulcer and blood have grown MRSA. He is mildly confused. His temperature is 39.5°C, pulse rate 96 bpm and BP 114/60 mmHg.  Which is the most appropriate initial antibiotic treatment?  A. Co-amoxiclav  B. Flucloxacillin  C. Meropenem  D. Piperacillin with tazobactam  E. Vancomycin | Attempt 1  Given the patient's history of cellulitis with confirmed MRSA infection, the most appropriate initial antibiotic treatment option would be option E. Vancomycin.  MRSA (Methicillin-Resistant Staphylococcus aureus) is a type of bacteria that is resistant to many commonly used antibiotics, including flucloxacillin and co-amoxiclav. Therefore, these options would not be effective against MRSA.  Vancomycin is an antibiotic that is effective against MRSA and is commonly used as the initial treatment for severe MRSA infections, such as cellulitis associated with systemic symptoms like fever and spreading infection. It is administered intravenously and has good activity against MRSA strains.  Options C and D (meropenem and piperacillin with tazobactam) are broad-spectrum antibiotics that may be effective against MRSA; however, they are not typically used as first-line treatment for MRSA infections like cellulitis. These antibiotics are usually reserved for more severe infections or when other treatment options are not available.  It is important to note that the choice of antibiotic may depend on local antibiotic resistance patterns and individual patient factors. Therefore, it is recommended to consult with an infectious disease specialist or follow local guidelines for the treatment of MRSA infections. |
| Attempt 2  Given the patient's clinical presentation of spreading cellulitis, fever, and positive MRSA cultures, the most appropriate initial antibiotic treatment would be E. Vancomycin.  Vancomycin is a potent antibiotic commonly used to treat infections caused by methicillin-resistant Staphylococcus aureus (MRSA), which is a type of bacteria resistant to many common antibiotics like penicillins and cephalosporins. The patient's condition, with spreading cellulitis and positive MRSA cultures, warrants the use of an antibiotic that is effective against MRSA.  Options A (Co-amoxiclav), B (Flucloxacillin), C (Meropenem), and D (Piperacillin with tazobactam) are not as appropriate in this case. Co-amoxiclav and Flucloxacillin do not cover MRSA, and Meropenem and Piperacillin with tazobactam are broad-spectrum antibiotics that are not typically the first-line choice for treating MRSA infections. Vancomycin is the more suitable choice based on the information provided. |
| Attempt 3  Given the presence of MRSA (methicillin-resistant Staphylococcus aureus) in the cultures and the severity of the cellulitis, the most appropriate initial antibiotic treatment would be Vancomycin (Option E). MRSA is resistant to many commonly used antibiotics, including flucloxacillin (Option B) and co-amoxiclav (Option A), which target methicillin-susceptible Staphylococcus aureus (MSSA).  Vancomycin is an effective antibiotic against MRSA and is commonly used for the treatment of severe infections caused by MRSA. It is usually administered intravenously. In this case, given the spreading cellulitis, high temperature, and the patient's mild confusion, intravenous therapy with Vancomycin would be the most appropriate choice.  Options C (Meropenem) and D (Piperacillin with tazobactam) are broad-spectrum antibiotics that are not specifically targeted against MRSA. They are more commonly used for treating infections caused by gram-negative bacteria. |
| **32** | A 75 year old man is found collapsed at home and is brought to the Emergency Department. He has right sided weakness and reduced consciousness. He has type 2 diabetes mellitus, atrial fibrillation and hypertension. He is taking warfarin. Investigations: INR 4.6 (<1.4) CT scan of the head shows a large intracranial haemorrhage. He is given intravenous vitamin K.  Which is the most appropriate next additional treatment?  A. Cryoprecipitate  B. Fresh frozen plasma  C. Fibrinogen concentrate  D. No additional treatment needed  E. Prothrombin complex concentrate | Attempt 1  The most appropriate next additional treatment in this scenario would be option E. Prothrombin complex concentrate.  The patient's presentation with a large intracranial hemorrhage and an elevated INR of 4.6 suggests over-anticoagulation with warfarin. Vitamin K is given to reverse the anticoagulant effects of warfarin by promoting the synthesis of clotting factors.  However, in the setting of an acute intracranial hemorrhage and high INR, there is a need for urgent and more rapid reversal of anticoagulation. Fresh frozen plasma (option B) and cryoprecipitate (option A) contain various clotting factors, but they have limitations in terms of volume and time needed for preparation, as well as the risk of volume overload and potential transmission of blood-borne infections.  Fibrinogen concentrate (option C) is used to address low fibrinogen levels, but it may not be the optimal choice as the primary treatment in this scenario.  Prothrombin complex concentrate (option E) is a concentrated form of clotting factors, including factors II, VII, IX, and X, which are deficient in warfarin-induced coagulopathy. It provides a more rapid and targeted reversal of anticoagulation. Therefore, in the case of an acute intracranial hemorrhage with over-anticoagulation, prothrombin complex concentrate is the preferred treatment option.  It is important to note that the decision on the choice and dose of reversal agents should be made in consultation with a hematologist or a specialist with expertise in anticoagulation management, taking into account individual patient factors and local guidelines. |
| Attempt 2 |
| Attempt 3  In this scenario, the patient has an intracranial hemorrhage and an elevated INR, indicating an over-anticoagulated state due to warfarin use. The most appropriate next additional treatment would be Prothrombin complex concentrate (Option E).  Prothrombin complex concentrate (PCC) contains factors II, VII, IX, and X, which are the clotting factors that are affected by warfarin. By administering PCC, the deficient clotting factors can be replenished, helping to reverse the anticoagulant effects of warfarin more rapidly. PCC is preferred over other options because it provides a more targeted and specific reversal of the anticoagulant effect.  Options A (Cryoprecipitate), B (Fresh frozen plasma), and C (Fibrinogen concentrate) contain various clotting factors but do not provide the full spectrum of factors affected by warfarin. Therefore, they are not as effective as PCC in rapidly reversing the anticoagulant effect of warfarin.  Option D (No additional treatment needed) is incorrect because in the case of an intracranial hemorrhage with an elevated INR, prompt reversal of anticoagulation is crucial to minimize further bleeding and neurological damage. |
| **33** | A 76 year old woman has no energy and reports excessive tiredness for the past 3 weeks. She has lost 5 kg in weight over the past 3 months. She drinks 30 units of alcohol per week. She is thin and jaundiced. Her temperature is 37.2°C. She has a palpable epigastric mass and 4 cm liver edge.  Which is the most likely diagnosis?  A. Cholangiocarcinoma  B. Cholecystitis  C. Cirrhosis of the liver  D. Hepatocellular carcinoma  E. Pancreatic adenocarcinoma | Attempt 1  Given the patient's clinical presentation, including excessive tiredness, weight loss, jaundice, palpable epigastric mass, and hepatomegaly, the most likely diagnosis is option E. Pancreatic adenocarcinoma.  Pancreatic adenocarcinoma is a malignant tumor originating from the pancreatic ducts. It is often associated with nonspecific symptoms, such as fatigue, weight loss, and jaundice. The presence of a palpable epigastric mass and hepatomegaly suggests local spread and involvement of adjacent structures, including the liver.  While other conditions, such as cholangiocarcinoma (option A), cholecystitis (option B), cirrhosis of the liver (option C), and hepatocellular carcinoma (option D), may also present with similar symptoms or findings, the combination of weight loss, jaundice, and a palpable epigastric mass points towards pancreatic adenocarcinoma as the most likely diagnosis.  Further diagnostic evaluation, such as imaging studies (e.g., CT scan) and potentially a biopsy, would be necessary to confirm the diagnosis. Prompt referral to an oncologist or gastroenterologist for further management and treatment options would be appropriate in this case. |
| Attempt 2  Based on the information provided, the most likely diagnosis is indeed E. Pancreatic adenocarcinoma.  Pancreatic adenocarcinoma is a type of cancer that originates in the pancreas and often presents with symptoms such as weight loss, fatigue, jaundice, and a palpable mass in the abdomen. The patient's history of weight loss, excessive tiredness, alcohol consumption, jaundice, thinness, and the presence of an epigastric mass align with the typical clinical presentation of pancreatic adenocarcinoma. The palpable epigastric mass could be the tumor itself.  While the other options (A. Cholangiocarcinoma, B. Cholecystitis, C. Cirrhosis of the liver, D. Hepatocellular carcinoma) are relevant considerations, the provided symptoms and findings appear to correlate more closely with pancreatic adenocarcinoma. It's important to consult a medical professional for an accurate diagnosis and appropriate management. |
| Attempt 3  Based on the given clinical presentation, the most likely diagnosis in this case would be pancreatic adenocarcinoma (Option E).  The patient's symptoms of excessive tiredness, weight loss, and jaundice, along with the presence of a palpable epigastric mass and an enlarged liver edge, are suggestive of pancreatic adenocarcinoma. This type of cancer often presents with nonspecific symptoms such as fatigue, weight loss, and jaundice. The palpable mass and enlarged liver can be indicative of local tumor invasion.  While other options such as cholangiocarcinoma (Option A), cholecystitis (Option B), cirrhosis of the liver (Option C), and hepatocellular carcinoma (Option D) may also cause similar symptoms, the combination of weight loss, jaundice, and a palpable epigastric mass is more consistent with pancreatic adenocarcinoma. |
| **34** | A 76 year old woman with hypertension is taking amlodipine 10 mg daily. A 24 hour BP measurement shows a mean BP of 168/90 mmHg. Investigations: Sodium 135 mmol/L (135–146) Potassium 4.0 mmol/L (3.5–5.3) Urea 7 mmol/L (2.5–7.8) Creatinine 100 μmol/L (60–120) eGFR 68 mL/min/1.73 m2(>60) Urinary albumin : creatinine ratio 50 mg/mmol (<3.5)  Which class of antihypertensive should be added?  A. ACE inhibitor  B. Alpha blocker  C. Beta blocker  D. Loop diuretic  E. Thiazide-like diuretic | Attempt 1  Based on the patient's clinical presentation and 24-hour BP measurement, the most appropriate class of antihypertensive to add would be option A. ACE inhibitor.  The patient has hypertension with a mean BP of 168/90 mmHg on amlodipine 10 mg daily, which indicates inadequate control of blood pressure. Adding another antihypertensive medication from a different class is recommended to achieve better blood pressure control.  ACE inhibitors are a commonly used class of antihypertensive medications. They have been shown to effectively reduce blood pressure and have additional benefits in patients with hypertension, such as renal protection and cardiovascular risk reduction. ACE inhibitors are particularly beneficial in patients with comorbid conditions, such as diabetes or chronic kidney disease, as they provide additional renal and cardiovascular protective effects.  Therefore, in this patient with hypertension and inadequate blood pressure control on amlodipine, adding an ACE inhibitor as a second-line agent would be a suitable choice. However, the final decision should be made in consultation with the patient's healthcare provider, considering individual patient factors, contraindications, and potential drug interactions. |
| Attempt 2  Based on the provided information, the most appropriate choice for adding an antihypertensive medication would be A. ACE inhibitor.  The patient is already on amlodipine for hypertension, but their 24-hour blood pressure measurement still shows elevated blood pressure. Additionally, the patient has indications of kidney involvement with an elevated urinary albumin to creatinine ratio (a marker of kidney damage) and a slightly reduced estimated glomerular filtration rate (eGFR). Both of these findings suggest that kidney protection is important in managing their hypertension.  ACE inhibitors are commonly used in hypertensive patients with kidney involvement as they not only lower blood pressure but also have a kidney-protective effect. They can help slow down the progression of kidney damage and reduce albuminuria. Therefore, adding an ACE inhibitor to the treatment regimen could be beneficial in this case.  However, treatment decisions should always be made in consultation with a medical professional who has a comprehensive understanding of the patient's medical history, overall health, and individual needs. |
| Attempt 3  Based on the given information, the most appropriate class of antihypertensive to add in this case would be an ACE inhibitor (Option A).  The patient's 24-hour BP measurement shows an elevated mean blood pressure of 168/90 mmHg, indicating inadequate blood pressure control despite being on amlodipine 10 mg daily. Adding another antihypertensive agent is necessary to achieve better blood pressure control.  ACE inhibitors are a recommended first-line treatment for hypertension, particularly in patients with comorbid conditions such as diabetes or chronic kidney disease. The patient's normal urinary albumin-to-creatinine ratio and relatively preserved renal function suggest that an ACE inhibitor would be an appropriate choice in this case.  Alpha blockers (Option B), beta blockers (Option C), and loop diuretics (Option D) may also be considered in specific clinical situations, but ACE inhibitors are generally preferred as an initial add-on therapy for hypertension management. Thiazide-like diuretics (Option E) are typically used as first-line or add-on therapy in patients with uncomplicated hypertension, but in this case, an ACE inhibitor would be more suitable. |
| **35** | A 70 year old man is an inpatient on the cardiology ward. He has worsening breathlessness that woke him up last night. His pulse rate is 99 bpm, BP 160/100 mmHg and respiratory rate 20 breaths per minute. Auscultation of the chest reveals bibasal crepitations, and there is dullness to percussion of both bases. Chest X-ray shows small bilateral pleural effusions with upper lobe blood vessel diversion.  Which is the most appropriate diagnostic investigation?  A. Coronary angiography  B. CT pulmonary angiography  C. ECG  D. Echocardiography  E. Serum D dimer | Attempt 1  Given the patient's presentation of worsening breathlessness, bibasal crepitations, and small bilateral pleural effusions with upper lobe blood vessel diversion on chest X-ray, the most appropriate diagnostic investigation would be option D. Echocardiography.  The clinical findings, including the presence of bibasal crepitations and pleural effusions, suggest the possibility of congestive heart failure (CHF) as the underlying cause of the patient's symptoms. Echocardiography is a valuable tool in evaluating the structure and function of the heart, which can help determine the presence and severity of cardiac dysfunction.  Echocardiography can assess various parameters related to cardiac function, such as left ventricular ejection fraction (LVEF), valvular abnormalities, and the presence of ventricular or atrial enlargement. It can help identify the underlying cause of heart failure, such as systolic dysfunction, diastolic dysfunction, or valvular pathology.  By performing echocardiography, the healthcare provider can evaluate the patient's cardiac function and determine the presence of any structural or functional abnormalities that may be contributing to the symptoms of heart failure. This information will guide further management and treatment decisions, such as optimizing heart failure medications or considering interventions like valve replacement or revascularization if indicated.  While other investigations, such as coronary angiography (option A), CT pulmonary angiography (option B), ECG (option C), and serum D-dimer (option E), may have their roles in specific clinical scenarios, echocardiography is the most appropriate initial diagnostic investigation to evaluate the cardiac function and structure in a patient with suspected heart failure. |
| Attempt 2  Based on the provided information, the most appropriate diagnostic investigation would be D. Echocardiography.  The patient's presentation of worsening breathlessness, elevated heart rate, elevated blood pressure, bibasal crepitations, dullness to percussion of both lung bases, and small bilateral pleural effusions with upper lobe blood vessel diversion on chest X-ray suggests the possibility of heart failure with associated pleural effusions.  Echocardiography is a valuable tool in evaluating heart function and structure. It can help determine if the patient's symptoms are due to heart failure, assess the overall heart function (ejection fraction), identify any structural abnormalities, and provide information about the cause of the symptoms. In this case, it can help confirm or rule out heart failure as the underlying cause of the patient's symptoms and guide appropriate management.  While other investigations like ECG, CT pulmonary angiography, and serum D dimer might be relevant in specific clinical scenarios, given the symptoms and findings described, echocardiography would provide the most targeted and relevant information in this case. However, the final decision should be made by the attending healthcare professionals based on the patient's individual situation. |
| Attempt 3  Based on the provided information, the most appropriate diagnostic investigation for this patient would be Echocardiography (Option D).  The patient's symptoms of worsening breathlessness, bibasal crepitations, and pleural effusions, along with dullness to percussion of both lung bases, suggest the presence of congestive heart failure (CHF). CHF is a common cardiac condition characterized by fluid accumulation in the lungs and peripheral edema.  Echocardiography is a non-invasive imaging test that can assess the structure and function of the heart. It can help evaluate cardiac function, identify structural abnormalities, assess the presence of valvular disease, and estimate the ejection fraction. In this case, echocardiography would be valuable in assessing cardiac function, identifying any structural abnormalities that may contribute to the patient's symptoms, and determining the underlying cause of the CHF.  Coronary angiography (Option A) is primarily used to assess the coronary arteries for the presence of blockages or narrowing. It may be indicated if the patient's symptoms and clinical presentation suggest underlying coronary artery disease as a possible cause of CHF, but in this scenario, the presentation is more consistent with fluid overload rather than acute coronary syndrome.  CT pulmonary angiography (Option B) is used to evaluate for pulmonary embolism, which typically presents with acute-onset dyspnea and may be associated with pleural effusions. However, in this case, the patient's symptoms and examination findings are more indicative of congestive heart failure rather than a pulmonary embolism.  An ECG (Option C) is a useful initial test in assessing cardiac function and identifying any acute cardiac abnormalities, such as arrhythmias or myocardial ischemia. However, echocardiography would provide more comprehensive information about the patient's cardiac structure and function in this case.  Serum D-dimer (Option E) is a blood test used as a screening tool for suspected venous thromboembolism, such as deep vein thrombosis or pulmonary embolism. It is not the most appropriate diagnostic investigation for this patient, as the clinical presentation and findings are more consistent with congestive heart failure.  Therefore, based on the given information, echocardiography (Option D) would be the most appropriate diagnostic investigation to evaluate the patient's cardiac function and determine the underlying cause of the congestive heart failure. |
| **36** | An 80 year old man has sudden onset of loss of vision in his right eye. He has hypertension and a previous stroke. His visual acuity is hand movements only in the right eye and 6/9 in left eye. The right eye has an afferent pupillary defect; left eye pupil responses are normal. On fundoscopy there is a red spot at the right macula.  Which is the most likely diagnosis?  A. Anterior ischaemic optic neuropathy  B. Branch retinal vein occlusion  C. Central retinal artery occlusion  D. Macular degeneration  E. Retinal detachment | Attempt 1  Based on the sudden onset of loss of vision in the right eye, presence of an afferent pupillary defect, and a red spot at the right macula on fundoscopy, the most likely diagnosis in this case is option C. Central retinal artery occlusion.  Central retinal artery occlusion (CRAO) is characterized by sudden, painless, and often profound loss of vision in one eye. It is typically associated with a relative afferent pupillary defect (Marcus Gunn pupil) due to the decreased or absent light response in the affected eye. Fundoscopy findings in CRAO may include a pale retina with a cherry-red spot at the fovea, indicating ischemia to the central macula.  Anterior ischaemic optic neuropathy (option A) typically presents with sudden painless loss of vision, but it is associated with optic disc swelling (papilledema) rather than a cherry-red spot on fundoscopy. Branch retinal vein occlusion (option B) is characterized by sudden painless loss of vision with retinal hemorrhages and venous dilation in the affected area. Macular degeneration (option D) typically presents with gradual central vision loss, and retinal detachment (option E) is characterized by a sudden onset of floaters, flashes of light, and a curtain-like visual field defect.  Therefore, based on the clinical presentation and findings, the most likely diagnosis in this case is central retinal artery occlusion (CRAO). Immediate evaluation and management are crucial in order to preserve any remaining vision and to prevent further complications. |
| Attempt 2  Based on the provided information, the most likely diagnosis would be C. Central retinal artery occlusion.  The sudden onset of loss of vision in one eye, especially with the presence of an afferent pupillary defect (also known as Marcus Gunn pupil), along with a red spot at the macula, strongly suggests a blockage of the central retinal artery. The red spot at the macula is known as a cherry-red spot and is a characteristic finding in central retinal artery occlusion.  This condition occurs when the blood supply to the retina's central artery is interrupted, leading to sudden and severe vision loss. Risk factors like hypertension, previous stroke, and age further support the possibility of a vascular-related issue.  While the other options (A. Anterior ischaemic optic neuropathy, B. Branch retinal vein occlusion, D. Macular degeneration, E. Retinal detachment) could be considered, the combination of symptoms and findings described align more closely with central retinal artery occlusion. It's important for the individual to seek immediate medical attention, as central retinal artery occlusion is a serious condition requiring prompt evaluation and potential intervention. |
| Attempt 3  Based on the provided information, the most likely diagnosis for this patient's sudden onset of loss of vision in the right eye is Central retinal artery occlusion (Option C).  Central retinal artery occlusion (CRAO) is a serious condition characterized by the sudden blockage of the central retinal artery, which leads to a severe and often painless loss of vision in the affected eye. It typically presents with sudden, profound, and often permanent vision loss. The presence of an afferent pupillary defect (relative afferent pupillary defect or Marcus Gunn pupil) suggests a disruption of the optic nerve pathway and further supports the diagnosis of CRAO.  The description of a red spot at the right macula on fundoscopy is consistent with the finding of a cherry-red spot, which is a classic feature of CRAO. The central retinal artery supplies the macula, and when the blood flow is blocked, the macula appears relatively pale surrounded by a cherry-red spot due to the contrast between the pale ischemic area and the remaining vascularized retina.  Anterior ischemic optic neuropathy (Option A) typically presents with sudden painless vision loss, but it primarily affects the optic disc rather than the macula. It may present with optic disc swelling (papilledema) or optic disc pallor.  Branch retinal vein occlusion (Option B) would cause a localized loss of vision in a specific area of the retina supplied by the affected branch retinal vein, rather than a sudden, profound loss of vision as described in this case.  Macular degeneration (Option D) usually presents with a gradual loss of central vision rather than a sudden onset of severe vision loss.  Retinal detachment (Option E) can cause sudden vision loss, but it typically presents with the perception of floaters, flashes of light, and a curtain-like visual field defect. The presence of a red spot at the macula is not a characteristic finding of retinal detachment.  Therefore, based on the given information, the most likely diagnosis for this patient's sudden onset of loss of vision in the right eye, with an afferent pupillary defect and a red spot at the macula, is Central retinal artery occlusion (Option C). |
| **37** | A 72 year old woman has had inability to sleep well for the past 3 years. She gets to sleep by 23:00 but wakes up two or three times in the night and gets up by 07:00. Her husband says that she doesn't snore. Her BMI is 23 kg/m2. She carries out her normal daytime activities with no daytime somnolence. She is otherwise well. Her MMSE (Mini Mental State Examination) score is 27/30.  Which is the most likely cause of her insomnia?  A. Depression  B. Early stages of dementia  C. Hypomania  D. Normal age related sleep pattern  E. Obstructive sleep apnoea | Attempt 1  Based on the provided information, the most likely cause of her insomnia is option D: Normal age-related sleep pattern.  Insomnia, or difficulty sleeping, is a common complaint among older adults. As people age, their sleep patterns tend to change, and it is normal for them to experience more fragmented sleep, including waking up multiple times during the night. In this case, the patient falls asleep at a regular time and is able to carry out normal daytime activities without experiencing daytime somnolence. Her MMSE score of 27/30 indicates that she has good cognitive function.  The absence of snoring and the lack of symptoms suggestive of other sleep disorders, such as excessive daytime sleepiness or witnessed apneas, make options A (depression) and E (obstructive sleep apnea) less likely. Additionally, there are no indications of hypomania (option C) or early stages of dementia (option B) based on the information provided.  Given the patient's normal activities and cognitive function, as well as the absence of other concerning symptoms, the most likely cause of her insomnia is a normal age-related sleep pattern. It is important to educate and reassure the patient about age-related changes in sleep and provide guidance on sleep hygiene practices to improve the quality of her sleep. |
| Attempt 2  Based on the provided information, the most likely cause of her insomnia is D. Normal age-related sleep pattern.  As people age, their sleep patterns can change. It's not uncommon for older individuals to experience fragmented sleep, waking up multiple times during the night. This can lead to perceptions of poor sleep quality, even though they may still feel well-rested during the day.  The woman's ability to carry out normal daytime activities without somnolence, her MMSE score of 27/30 (indicating a relatively high cognitive function), and the absence of snoring or significant daytime symptoms suggest that her sleep disturbances may be a part of the normal aging process rather than being linked to a more serious underlying condition like depression, dementia, hypomania, or obstructive sleep apnea.  It's important to consider that other factors, such as lifestyle habits and sleep hygiene practices, can also contribute to sleep disturbances. If the woman is concerned about her sleep or if her insomnia is causing significant distress, it's recommended for her to consult a healthcare professional for a comprehensive evaluation and personalized advice. |
| Attempt 3  Based on the information provided, the most likely cause of the 72-year-old woman's insomnia is D. Normal age-related sleep pattern.  The patient's inability to sleep well and waking up two or three times during the night is a common occurrence in older adults. As people age, their sleep patterns tend to change, and it is not uncommon for them to experience fragmented sleep with multiple awakenings during the night. The patient's ability to carry out normal daytime activities without daytime somnolence also suggests that her sleep disturbances are not significantly impacting her daily functioning.  Depression (Option A) can cause insomnia, but there are no other signs or symptoms suggestive of depression mentioned in the scenario. The patient's MMSE score of 27/30 indicates that her cognitive function is relatively intact, making depression less likely.  Early stages of dementia (Option B) can sometimes cause sleep disturbances, but there are no other cognitive impairments mentioned in the scenario, and the MMSE score of 27/30 suggests good cognitive functioning.  Hypomania (Option C) is characterized by elevated mood, increased energy, and decreased need for sleep. There are no other symptoms or indications of hypomania mentioned in the scenario.  Obstructive sleep apnea (Option E) is unlikely in this case because the patient's husband states that she does not snore, which is a common symptom of obstructive sleep apnea.  Therefore, based on the information provided, the most likely cause of the woman's insomnia is D. Normal age-related sleep pattern. It is important to note that other causes of insomnia should be considered if her symptoms worsen or if additional symptoms arise. |
| **38** | A 35 year old man visits his GP with 3 days of a red, painful left eye with no discharge. There is a diffuse area of redness in the medial aspect of his left sclera. His pupils and visual acuity are normal.  Which is the most appropriate management?  A. Arrange assessment in emergency eye clinic  B. Prescribe chloramphenicol eye drops  C. Prescribe corticosteroid eye drops  D. Prescribe topical aciclovir  E. Reassure patient that it will resolve spontaneously | Attempt 1  Based on the given information, the most appropriate management for the 35-year-old man with a red, painful left eye and no discharge would be option E: Reassure the patient that it will resolve spontaneously.  The presentation of a red, painful eye with no discharge and normal visual acuity is suggestive of a self-limiting condition called episcleritis. Episcleritis is an inflammatory condition that affects the episcleral tissue, which lies between the conjunctiva and the sclera.  Episcleritis typically resolves on its own without any specific treatment. It is usually a benign and self-limiting condition that does not require any intervention. Reassurance can be provided to the patient, along with advice to use artificial tears for symptom relief if necessary.  Options A, B, C, and D are not appropriate for this scenario. Referral to the emergency eye clinic (option A) is not necessary unless there are severe symptoms or signs of a more serious condition. Prescribing chloramphenicol eye drops (option B) is not indicated as there is no evidence of infection. Corticosteroid eye drops (option C) are typically reserved for more severe or chronic cases of episcleritis, and topical aciclovir (option D) would be relevant if herpetic keratitis was suspected, but there is no indication for it based on the given information.  It is important to note that a thorough examination by a healthcare professional is always recommended to confirm the diagnosis and rule out other potential causes. |
| Attempt 2  Based on the provided information, the most appropriate management in this case would be A. Arrange assessment in an emergency eye clinic.  The diffuse area of redness in the medial aspect of the left sclera, along with the painful red eye and absence of discharge, could indicate a condition that needs further evaluation by an eye specialist. While some mild cases of conjunctivitis (pink eye) might resolve on their own or with over-the-counter treatments, the sudden onset of a red and painful eye without discharge raises the possibility of other more serious conditions that require prompt attention.  Conditions such as scleritis or uveitis, which involve inflammation of the deeper layers of the eye, can present with these symptoms and can have potentially serious consequences for vision if not managed appropriately. An emergency eye clinic assessment would be the most prudent course of action to accurately diagnose the condition and determine the appropriate treatment.  It's important for healthcare professionals to evaluate eye symptoms comprehensively to ensure the best possible outcomes for the patient's eye health. |
| Attempt 3  Based on the presented information, the most appropriate management for the 35-year-old man with a red, painful left eye and no discharge is A. Arrange assessment in the emergency eye clinic.  The diffuse area of redness in the medial aspect of the left sclera suggests inflammation or irritation. It is important to rule out any serious underlying causes and to obtain a proper diagnosis. Referring the patient to the emergency eye clinic allows for a thorough evaluation by an ophthalmologist who can assess the condition more comprehensively and provide appropriate treatment if necessary.  Prescribing chloramphenicol eye drops (Option B) may be considered for bacterial conjunctivitis with discharge, but since the patient has no discharge and the presentation is more consistent with scleritis or another inflammatory condition, it is not the most appropriate initial management.  Prescribing corticosteroid eye drops (Option C) should be done cautiously and under the supervision of an ophthalmologist. Corticosteroids can be beneficial for certain inflammatory conditions, but they can also worsen certain infections or other causes of red eye. Therefore, it is important to have a proper evaluation before considering this treatment option.  Prescribing topical aciclovir (Option D) would be appropriate if there were signs or suspicion of herpetic keratitis, such as dendritic ulcers or vesicular lesions on the cornea. However, since the presentation does not indicate these findings, it is not the most appropriate initial management.  Reassuring the patient that it will resolve spontaneously (Option E) is not recommended without further assessment. The symptoms of a red, painful eye can be caused by various conditions, some of which may require treatment to prevent complications or further damage.  Therefore, in this case, arranging assessment in the emergency eye clinic (Option A) is the most appropriate management to ensure an accurate diagnosis and appropriate treatment. |
| **39** | An 18 year old woman is found dead, sitting in front of a gas fire that is still burning. The flue that carries gases away from the fire is found to be blocked.  Which is the principal mechanism of action of the poison involved in her death?  A. Binding to the site on haemoglobin normally occupied by oxygen  B. Converting carbon dioxide to carbonic acid in the cytoplasm of peripheral cells  C. Converting the iron in haem to an iron salt  D. Damaging the lipid bilayer of alveolar pneumocytes  E. Inhibiting cytochrome enzyme systems | Attempt 1  Based on the information provided, the principal mechanism of action of the poison involved in the woman's death would be option A: Binding to the site on hemoglobin normally occupied by oxygen.  When a flue is blocked and there is incomplete combustion of fuel, such as in this case with the gas fire, it can lead to the release of toxic gases, particularly carbon monoxide (CO). Carbon monoxide is a colorless, odorless, and tasteless gas that can be highly toxic.  Carbon monoxide has a high affinity for hemoglobin in the blood, binding to the same site that normally binds oxygen. This binding is much stronger than the binding of oxygen, leading to the formation of carboxyhemoglobin (COHb). As a result, the oxygen-carrying capacity of hemoglobin is compromised, leading to tissue hypoxia and potentially fatal consequences.  The lack of oxygen delivery to vital organs, including the brain and heart, can lead to cellular damage and eventually death. This mechanism explains the cause of death in cases of carbon monoxide poisoning.  Options B, C, D, and E are not directly related to the mechanism of action of carbon monoxide poisoning. Carbon dioxide (CO2) does not convert to carbonic acid in the cytoplasm of peripheral cells (option B). Carbon monoxide does not directly convert the iron in hemoglobin to an iron salt (option C). Damaging the lipid bilayer of alveolar pneumocytes (option D) is not a primary mechanism of carbon monoxide toxicity. Inhibiting cytochrome enzyme systems (option E) is not the principal mechanism of action of carbon monoxide. |
| Attempt 2  Based on the provided information, the most likely mechanism of action involved in her death would be E. Inhibiting cytochrome enzyme systems.  A blocked flue in a gas fire can lead to incomplete combustion and the release of toxic gases like carbon monoxide (CO). Carbon monoxide is a colorless and odorless gas that is known for its ability to bind to hemoglobin in red blood cells, preventing the binding of oxygen. This is represented by choice A ("Binding to the site on haemoglobin normally occupied by oxygen").  However, the principal mechanism of action for carbon monoxide toxicity is its ability to inhibit cytochrome enzyme systems. Cytochrome enzymes, specifically cytochrome c oxidase in the mitochondria, are crucial for cellular respiration and the production of energy (ATP) in cells. Carbon monoxide binds to these enzymes and disrupts the electron transport chain, leading to cellular hypoxia (lack of oxygen) and metabolic dysfunction. This ultimately affects various organs, including the heart and brain, and can lead to death.  Carbon monoxide poisoning is a serious condition that requires immediate medical attention. It's a reminder of the importance of proper ventilation and monitoring gas appliances to prevent such tragic incidents. |
| Attempt 3  Based on the information provided, the principal mechanism of action of the poison involved in the woman's death is A. Binding to the site on hemoglobin normally occupied by oxygen.  When the flue that carries gases away from the gas fire is blocked, it can lead to the accumulation of toxic gases, most notably carbon monoxide (CO). Carbon monoxide has a high affinity for hemoglobin, the molecule responsible for transporting oxygen in the blood. Carbon monoxide binds to the site on hemoglobin that is normally occupied by oxygen, forming carboxyhemoglobin (COHb). This binding reduces the capacity of hemoglobin to carry oxygen, leading to tissue hypoxia.  The affinity of carbon monoxide for hemoglobin is approximately 200 times greater than that of oxygen. As a result, even relatively low levels of carbon monoxide in the environment can lead to significant poisoning and potentially fatal outcomes.  The other options listed are not directly related to the mechanism of action of carbon monoxide poisoning:  B. Converting carbon dioxide to carbonic acid in the cytoplasm of peripheral cells: This does not describe the mechanism of carbon monoxide poisoning. Carbon monoxide does not convert carbon dioxide to carbonic acid.  C. Converting the iron in hem to an iron salt: Carbon monoxide does not convert the iron in hemoglobin to an iron salt.  D. Damaging the lipid bilayer of alveolar pneumocytes: Carbon monoxide primarily affects the binding capacity of hemoglobin and does not directly damage the lipid bilayer of alveolar pneumocytes.  E. Inhibiting cytochrome enzyme systems: While carbon monoxide can interfere with cellular respiration and the activity of cytochrome enzymes, it is not the principal mechanism of action in this scenario. The primary mechanism is the binding of carbon monoxide to hemoglobin, reducing oxygen-carrying capacity.  Therefore, option A, binding to the site on hemoglobin normally occupied by oxygen, is the principal mechanism of action of the poison involved in her death in this case. |
| **40** | A 35 year old man with type 1 diabetes mellitus has burning pain in his feet and difficulty sleeping. He has retinopathy and nephropathy. Investigation: eGFR 28 mL/min/1.73m2(> 60)  Which is the most appropriate management?  A. Acupuncture  B. Amitriptyline  C. Duloxetine  D. Physiotherapy  E. Sodium valproate | Attempt 1  The most appropriate management for the 35-year-old man with type 1 diabetes mellitus, burning pain in his feet, and difficulty sleeping, along with an eGFR of 28 mL/min/1.73m², would be option C: Duloxetine.  The symptoms described by the patient, including burning pain in the feet and difficulty sleeping, are consistent with diabetic peripheral neuropathy. Diabetic neuropathy is a common complication of diabetes that affects the peripheral nerves and can cause various symptoms, including pain, numbness, and tingling in the feet and hands.  Duloxetine is a medication commonly used to manage diabetic neuropathy. It belongs to a class of drugs called serotonin-norepinephrine reuptake inhibitors (SNRIs) and works by increasing the levels of certain neurotransmitters in the brain and spinal cord, which can help reduce neuropathic pain.  Acupuncture (option A) may have some benefits in managing certain types of pain, but its effectiveness for diabetic neuropathy is uncertain, and it may not be the most appropriate initial management in this case.  Amitriptyline (option B) is another medication used for neuropathic pain, but it is typically considered a second-line treatment. Duloxetine is often preferred due to its favorable side effect profile and its effectiveness specifically for diabetic neuropathy.  Physiotherapy (option D) may play a role in managing other aspects of diabetes care, such as promoting physical activity and addressing musculoskeletal issues, but it is not the primary treatment for diabetic neuropathy.  Sodium valproate (option E) is not indicated for the management of diabetic neuropathy. It is primarily used for conditions such as epilepsy and bipolar disorder.  It is important for the patient to have a comprehensive management plan for his diabetes, including glycemic control, blood pressure management, and regular monitoring of renal function. Close collaboration with a healthcare provider, such as a primary care physician or endocrinologist, is essential for the optimal management of his condition. |
| Attempt 2  Based on the information provided, the most appropriate management for this individual's symptoms would be C. Duloxetine.  The patient's symptoms of burning pain in the feet and difficulty sleeping are indicative of diabetic neuropathy, a common complication of diabetes. Diabetic neuropathy can cause nerve damage and result in painful sensations in the extremities, like burning pain. Additionally, the patient's retinopathy and nephropathy suggest the presence of diabetes-related complications, which can contribute to the development of neuropathy.  Duloxetine is a medication commonly used to manage neuropathic pain. It is a serotonin-norepinephrine reuptake inhibitor (SNRI) that can help alleviate the symptoms of neuropathic pain, including burning pain. It's important to note that proper blood sugar control and management of diabetes are crucial to preventing and mitigating the progression of complications.  However, the final decision about treatment should be made in consultation with a healthcare professional who is familiar with the patient's medical history and can provide personalized recommendations. |
| Attempt 3  The most appropriate management for a 35-year-old man with type 1 diabetes mellitus, burning pain in his feet, and difficulty sleeping, along with evidence of nephropathy (eGFR 28 mL/min/1.73m²), would be option C: Duloxetine.  The symptoms described, including burning pain in the feet, are suggestive of diabetic peripheral neuropathy, a common complication of diabetes. Duloxetine is a medication commonly used to manage neuropathic pain. It belongs to a class of drugs known as serotonin-norepinephrine reuptake inhibitors (SNRIs) and has been shown to be effective in reducing neuropathic pain symptoms.  Option A, acupuncture, may provide some relief for certain individuals with neuropathic pain, but its effectiveness varies, and it is not considered a first-line treatment.  Option B, amitriptyline, is an antidepressant that is sometimes used to manage neuropathic pain. However, duloxetine is generally preferred over amitriptyline for diabetic peripheral neuropathy due to its more specific targeting of pain pathways.  Option D, physiotherapy, may be beneficial for other aspects of diabetic management, such as improving physical function and mobility, but it is not a primary treatment for neuropathic pain.  Option E, sodium valproate, is not typically used for the management of diabetic peripheral neuropathy. Sodium valproate is primarily indicated for the treatment of epilepsy and bipolar disorder.  Therefore, based on the information provided, duloxetine (option C) would be the most appropriate management for the patient's symptoms of burning pain in his feet and difficulty sleeping associated with diabetic peripheral neuropathy. It is important for the patient to consult with their healthcare provider for a proper evaluation and to discuss the most suitable treatment plan for their specific condition. |
| **41** | A 24 year old woman has tiredness, bloating and weight loss with bouts of offensive smelling diarrhoea. Abdominal examination is normal. Investigations: Haemoglobin 10.0 g/L (115–150) Mean cell volume (MCV) 78 fL (80–96) Platelets 350 × 109/L (150–400) Duodenal biopsy shows flattening of villi and increased lymphocytes in the lamina propria and surface epithelium. In addition, there is gross crypt hyperplasia.  Which is the most likely diagnosis?  A. Carcinoid tumour  B. Coeliac disease  C. Collagenous enteropathy  D. Crohn's disease  E. Pseudomembranous enteropathy | Attempt 1  The most likely diagnosis for the 24-year-old woman with tiredness, bloating, weight loss, offensive smelling diarrhea, and the findings of flattening of villi, increased lymphocytes in the lamina propria and surface epithelium, and gross crypt hyperplasia on duodenal biopsy is option B: Coeliac disease.  Coeliac disease, also known as celiac disease, is an autoimmune disorder characterized by an abnormal immune response to gluten, a protein found in wheat, barley, and rye. The ingestion of gluten triggers an immune-mediated reaction in the small intestine, leading to inflammation, villous atrophy (flattening of the villi), and crypt hyperplasia.  The symptoms described by the patient, including tiredness, bloating, weight loss, and offensive smelling diarrhea, are common manifestations of coeliac disease. Malabsorption of nutrients, particularly fat, can result in weight loss and bulky, foul-smelling stools. Bloating and tiredness are also frequently reported symptoms.  The laboratory findings of low hemoglobin (10.0 g/L) and a decreased mean cell volume (MCV) (78 fL) are indicative of microcytic anemia, which can be seen in coeliac disease due to iron deficiency secondary to malabsorption.  Carcinoid tumors (option A) typically present with symptoms related to hormone overproduction, such as flushing, diarrhea, and wheezing. These symptoms are usually episodic and not associated with villous atrophy and crypt hyperplasia seen in coeliac disease.  Collagenous enteropathy (option C) is a rare condition characterized by the presence of a thickened subepithelial collagen band in the intestine. It can lead to chronic diarrhea and malabsorption, but the specific histological findings described in the case (increased lymphocytes, villous flattening, and crypt hyperplasia) are not consistent with this condition.  Crohn's disease (option D) is a chronic inflammatory bowel disease that can affect any part of the gastrointestinal tract. It typically presents with symptoms such as abdominal pain, diarrhea, and weight loss, but the specific histological findings described in the case (flattening of villi and increased lymphocytes) are not characteristic of Crohn's disease.  Pseudomembranous enteropathy (option E) is typically caused by Clostridium difficile infection and is characterized by the presence of pseudomembranes on endoscopy. It does not typically present with the described findings on duodenal biopsy and is not associated with gluten-related enteropathy seen in coeliac disease.  Confirmation of the diagnosis of coeliac disease can be obtained through serological tests, such as tissue transglutaminase (tTG) antibodies and anti-endomysial antibodies (EMA), and may require further evaluation, such as genetic testing and/or gluten challenge, in some cases. A gluten-free diet is the mainstay of treatment for coeliac disease to alleviate symptoms and promote intestinal healing. |
| Attempt 2  Based on the provided information, the most likely diagnosis is B. Coeliac disease.  The patient's symptoms of tiredness, bloating, weight loss, offensive smelling diarrhea, and the findings from duodenal biopsy (flattening of villi, increased lymphocytes in the lamina propria and surface epithelium, and gross crypt hyperplasia) are characteristic of coeliac disease.  Coeliac disease is an autoimmune disorder triggered by the ingestion of gluten, a protein found in wheat, barley, and rye. It leads to damage in the small intestine, resulting in malabsorption of nutrients, which can explain the low hemoglobin (anemia) and low mean cell volume (MCV) values. The duodenal biopsy findings of villous atrophy, increased intraepithelial lymphocytes, and crypt hyperplasia are consistent with coeliac disease.  The other options (A. Carcinoid tumour, C. Collagenous enteropathy, D. Crohn's disease, E. Pseudomembranous enteropathy) do not fit the described symptoms and biopsy findings as well as coeliac disease does.  It's important for the patient to work closely with a healthcare professional to confirm the diagnosis and manage coeliac disease through dietary adjustments. |
| Attempt 3  Based on the presented clinical findings and investigations, the most likely diagnosis for the 24-year-old woman is option B: Coeliac disease.  Coeliac disease is an autoimmune disorder characterized by an immune-mediated reaction to gluten, a protein found in wheat, barley, and rye. The symptoms of tiredness, bloating, weight loss, and offensive smelling diarrhoea are consistent with the gastrointestinal manifestations of coeliac disease.  The laboratory findings of low hemoglobin (anemia) and a decreased mean cell volume (MCV) suggest iron deficiency anemia, which is commonly associated with coeliac disease due to malabsorption of nutrients.  The duodenal biopsy findings of flattened villi, increased lymphocytes in the lamina propria and surface epithelium, and crypt hyperplasia are classic histological features of coeliac disease.  Option A, carcinoid tumor, is unlikely as it typically presents with different symptoms and would not cause the characteristic findings seen in the duodenal biopsy.  Option C, collagenous enteropathy, is a rare condition characterized by subepithelial collagen deposition in the intestinal mucosa, leading to similar symptoms and histological changes as coeliac disease. However, the most common cause of the reported findings is coeliac disease.  Option D, Crohn's disease, is a chronic inflammatory bowel disease that can cause similar symptoms, but the histological features described in the duodenal biopsy are not typical of Crohn's disease.  Option E, pseudomembranous enteropathy, is associated with Clostridium difficile infection and would not explain the specific histological changes observed in the duodenal biopsy.  Therefore, based on the symptoms, laboratory findings, and characteristic duodenal biopsy results, coeliac disease (option B) is the most likely diagnosis for this patient. It is important for her to follow up with a healthcare provider for further evaluation, confirmation, and appropriate management of the condition, which typically involves a gluten-free diet. |
| **42** | An 87 year old man develops profuse watery diarrhoea 6 days after admission for an infective exacerbation of COPD. He is currently taking oral co-amoxiclav.  Which is the most likely causative organism?  A. Campylobacter jejuni  B. Clostridioides difficile (Clostridium difficile)  C. Escherichia coli  D. Norovirus  E. Salmonella enteriditis | Attempt 1  The most likely causative organism for the 87-year-old man's profuse watery diarrhea occurring 6 days after admission and while taking oral co-amoxiclav is option B: Clostridioides difficile (Clostridium difficile).  Clostridioides difficile is a bacterium known to cause antibiotic-associated diarrhea, particularly in healthcare settings. The use of antibiotics, such as co-amoxiclav, disrupts the normal gut flora, allowing Clostridioides difficile to proliferate and produce toxins that lead to diarrhea.  The symptoms of profuse watery diarrhea occurring after antibiotic use, especially in a hospital setting, raise suspicion for Clostridioides difficile infection. Other common symptoms include abdominal pain, fever, and sometimes pseudomembranous colitis. Elderly individuals are more susceptible to Clostridioides difficile infection due to age-related changes in the gut flora and weakened immune system.  Campylobacter jejuni (option A) is a bacterial pathogen commonly associated with foodborne illnesses and can cause diarrhea, but it is less likely in this scenario as the symptoms occurred in a hospital setting during antibiotic use.  Escherichia coli (option C) is a diverse group of bacteria, some strains of which can cause diarrhea, but it is less commonly associated with antibiotic-associated diarrhea in healthcare settings.  Norovirus (option D) is a highly contagious virus known for causing outbreaks of gastroenteritis, particularly in closed settings such as hospitals, nursing homes, and cruise ships. However, the fact that the symptoms occurred after antibiotic use makes Clostridioides difficile a more likely cause.  Salmonella enteritidis (option E) is a bacterium commonly associated with food poisoning and can cause diarrhea, but it is less likely in this case as the symptoms occurred during hospitalization and antibiotic use.  To confirm the diagnosis of Clostridioides difficile infection, laboratory testing can be performed, such as stool culture, polymerase chain reaction (PCR) for detection of C. difficile toxins, or enzyme immunoassays. Treatment involves discontinuing the offending antibiotic if possible and initiating appropriate antibiotics targeting Clostridioides difficile, such as oral vancomycin or fidaxomicin. |
| Attempt 2  Given the information provided, the most likely causative organism for the profuse watery diarrhea in this scenario is B. Clostridioides difficile (formerly known as Clostridium difficile).  Antibiotics, particularly broad-spectrum antibiotics like co-amoxiclav, can disrupt the normal balance of gut bacteria, leading to overgrowth of bacteria like Clostridioides difficile. This can result in Clostridioides difficile-associated diarrhea (CDAD), which can range from mild diarrhea to severe colitis.  Among the options provided, Clostridioides difficile is the most common cause of antibiotic-associated diarrhea, especially in healthcare settings like hospitals. The fact that the patient developed the diarrhea after being on antibiotics for an infective exacerbation of COPD supports the possibility of Clostridioides difficile infection.  It's important for healthcare providers to be vigilant about the possibility of CDAD when prescribing antibiotics, especially in elderly patients with underlying health conditions. Proper diagnosis and management are crucial to prevent complications associated with Clostridioides difficile infection. |
| Attempt 3  The most likely causative organism for the profuse watery diarrhea in the 87-year-old man is option B: Clostridioides difficile (Clostridium difficile).  Clostridioides difficile is a bacterium known to cause antibiotic-associated diarrhea, especially in healthcare settings. The fact that the patient developed diarrhea 6 days after starting oral coamoxiclav (a broad-spectrum antibiotic) suggests the possibility of Clostridioides difficile infection. This bacterium can proliferate in the gut when the normal balance of the intestinal flora is disrupted by antibiotic use, leading to the overgrowth of Clostridioides difficile and subsequent toxin production.  Options A, C, D, and E (Campylobacter jejuni, Escherichia coli, Norovirus, and Salmonella enteriditis) can also cause diarrheal illnesses, but they are less likely in this particular scenario. Campylobacter jejuni and Salmonella enteriditis are commonly associated with foodborne infections and would typically present with symptoms earlier than 6 days after starting antibiotics. Escherichia coli and Norovirus can cause diarrhea, but they are less commonly associated with antibiotic use.  Given the history of antibiotic use and the timing of symptom onset, Clostridioides difficile (option B) is the most likely causative organism in this case. Confirmatory laboratory testing, such as a stool sample analysis for Clostridioides difficile toxins, would be necessary for a definitive diagnosis. Proper management would involve discontinuing the inciting antibiotic (if possible) and initiating appropriate treatment, which may include specific antibiotics effective against Clostridioides difficile, such as metronidazole or vancomycin. |
| **43** | A 22 year old woman has worsening shortness of breath and cough productive of four to five tablespoons of sputum per day. She has a history of childhood pneumonia and recurrent chest infections, and coughed up blood on two occasions many years ago. On auscultation of her chest there are bilateral scattered wheezes and coarse inspiratory crackles.  Which is the most likely diagnosis?  A. Bronchiectasis  B. COPD  C. Lung cancer  D. Pulmonary fibrosis  E. Sarcoidosis | Attempt 1  The most likely diagnosis for the 22-year-old woman with worsening shortness of breath, productive cough, history of childhood pneumonia, recurrent chest infections, and coughing up blood in the past is option A: Bronchiectasis.  Bronchiectasis is a condition characterized by irreversible dilation and damage to the bronchi and bronchioles, leading to chronic inflammation and recurrent respiratory infections. The symptoms commonly include chronic cough, production of large amounts of sputum, shortness of breath, and wheezing. The history of childhood pneumonia and recurrent chest infections are risk factors for developing bronchiectasis.  On auscultation, bilateral scattered wheezes and coarse inspiratory crackles are consistent with the findings in bronchiectasis. The crackles can be attributed to the presence of secretions and mucus plugs within the dilated airways.  COPD (option B) is a chronic lung condition primarily caused by smoking and is characterized by progressive airflow limitation. While chronic bronchitis, a subtype of COPD, can present with cough and sputum production, the onset at such a young age and the history of childhood pneumonia make bronchiectasis a more likely diagnosis.  Lung cancer (option C) is less likely in this case, given the patient's age and the chronicity of symptoms since childhood. However, it is essential to consider this possibility in patients with risk factors such as smoking or exposure to occupational carcinogens.  Pulmonary fibrosis (option D) refers to the scarring and thickening of the lung tissue, leading to progressive and irreversible lung function impairment. While it can present with cough and shortness of breath, the presence of wheezes and crackles suggests bronchiectasis as a more likely diagnosis.  Sarcoidosis (option E) is a multisystem inflammatory disorder characterized by the formation of granulomas in various organs, including the lungs. While it can present with respiratory symptoms such as cough and shortness of breath, the history of childhood pneumonia and recurrent chest infections point more towards bronchiectasis as the primary diagnosis.  Further diagnostic evaluation, such as high-resolution CT scan of the chest and pulmonary function tests, would be necessary to confirm the diagnosis of bronchiectasis and assess the extent of the disease. Treatment typically involves airway clearance techniques, antibiotics for treating infections, bronchodilators, and in some cases, surgical intervention to remove severely damaged bronchi. |
| Attempt 2  Based on the provided information, the most likely diagnosis is A. Bronchiectasis.  The recurrent chest infections, history of childhood pneumonia, productive cough with significant sputum production, and the presence of coarse inspiratory crackles suggest bronchiectasis. Bronchiectasis is a condition characterized by the permanent dilation of the bronchi and bronchioles due to repeated inflammation and infection. This leads to impaired clearance of mucus, chronic cough, and recurrent respiratory infections.  While other conditions like COPD, pulmonary fibrosis, and lung cancer might cause similar symptoms, the history of childhood pneumonia, recurrent infections, and coughing up blood (hemoptysis) in the past are more indicative of bronchiectasis.  It's important for the patient to undergo proper diagnostic evaluation and management to address the underlying causes and symptoms of bronchiectasis, as well as to prevent further complications. |
| Attempt 3  The most likely diagnosis for the 22-year-old woman with worsening shortness of breath, productive cough, childhood pneumonia, recurrent chest infections, and a history of coughing up blood is option A: Bronchiectasis.  Bronchiectasis is a condition characterized by the permanent dilation of the bronchi and bronchioles due to damage to the airways. It is often associated with recurrent respiratory infections, such as pneumonia, and can cause chronic cough and sputum production. The history of childhood pneumonia and recurrent chest infections, as well as the presence of wheezes and crackles on auscultation, are consistent with bronchiectasis.  Option B, COPD (chronic obstructive pulmonary disease), is less likely in a 22-year-old individual unless there is a history of significant exposure to respiratory irritants, such as smoking or occupational hazards.  Option C, lung cancer, is less likely in a young individual without risk factors such as smoking or significant environmental exposures.  Option D, pulmonary fibrosis, typically presents with progressive shortness of breath and dry cough. The presence of productive cough and childhood history of pneumonia is not typical of pulmonary fibrosis.  Option E, sarcoidosis, can present with respiratory symptoms, but the history of childhood pneumonia and recurrent chest infections is not typically associated with sarcoidosis.  Given the clinical presentation and history provided, bronchiectasis (option A) is the most likely diagnosis. Further diagnostic evaluation, such as imaging studies (e.g., high-resolution CT scan) and pulmonary function tests, would be needed to confirm the diagnosis. Treatment for bronchiectasis often includes airway clearance techniques, antibiotics for infections, and bronchodilators to alleviate symptoms. |
| **44** | A 52 year old woman has had four episodes of severe epigastric pain associated with vomiting over the past 3 months. The episodes occurred after eating and lasted for about 1 hour before complete resolution. She has a history of type 2 diabetes mellitus and takes metformin. Abdominal examination is normal. Her BMI is 35 kg/m2.  Which investigation is most likely to confirm the diagnosis?  A. Helicobacter stool antigen test  B. Liver function tests  C. Plain abdominal X-ray  D. Ultrasonography of abdomen  E. Upper gastrointestinal endoscopy | Attempt 1  The most appropriate investigation to confirm the diagnosis in this case would be option E: Upper gastrointestinal endoscopy.  The patient's symptoms of severe epigastric pain associated with vomiting after eating, occurring multiple times over the past 3 months, are suggestive of a possible gastric pathology. Upper gastrointestinal endoscopy allows direct visualization of the upper digestive tract, including the esophagus, stomach, and duodenum, and is the gold standard for diagnosing various conditions.  Given the patient's risk factors such as a history of type 2 diabetes mellitus and obesity (BMI of 35 kg/m2), there are several possible causes for her symptoms, including peptic ulcer disease, gastroesophageal reflux disease (GERD), gastritis, or even gastric cancer. Upper gastrointestinal endoscopy can help identify any mucosal abnormalities, such as ulcers, inflammation, or tumors, and allows for tissue sampling (biopsy) if necessary.  The other options listed are less likely to provide a definitive diagnosis in this case:  A. Helicobacter stool antigen test: This test is used to detect the presence of Helicobacter pylori, a bacterium associated with peptic ulcer disease. While it may be relevant in cases of suspected peptic ulcers, it would not provide a comprehensive evaluation of the upper gastrointestinal tract or identify other potential causes of the patient's symptoms.  B. Liver function tests: These tests primarily assess liver function and are not directly relevant to the patient's presenting symptoms of epigastric pain and vomiting.  C. Plain abdominal X-ray: A plain abdominal X-ray is useful for evaluating certain conditions such as bowel obstruction or the presence of calcifications or free air. However, it is unlikely to provide specific information related to the patient's symptoms or confirm a specific diagnosis.  D. Ultrasonography of the abdomen: While ultrasonography can be helpful in evaluating various abdominal organs, such as the liver, gallbladder, and kidneys, it may not provide detailed visualization of the upper gastrointestinal tract or help identify specific pathologies causing the patient's symptoms.  Therefore, considering the patient's symptoms and the need for direct visualization and potential tissue sampling, upper gastrointestinal endoscopy would be the most appropriate investigation to confirm the diagnosis. |
| Attempt 2  Based on the provided information, the investigation most likely to confirm the diagnosis in this case would be E. Upper gastrointestinal endoscopy.  The woman's recurrent episodes of severe epigastric pain associated with vomiting after eating could be indicative of peptic ulcers or other upper gastrointestinal issues. Upper gastrointestinal endoscopy allows direct visualization of the upper digestive tract, including the stomach and duodenum. This procedure can help identify the presence of ulcers, inflammation, or other abnormalities that might be causing her symptoms.  While other investigations like ultrasonography of the abdomen (option D) might be relevant in certain cases, endoscopy provides a more specific and direct way to visualize the potential underlying issues in the upper gastrointestinal tract, making it a valuable diagnostic tool in this scenario.  The final decision on which investigation to pursue should be made in consultation with a healthcare professional who can consider the patient's medical history, symptoms, and individual circumstances. |
| Attempt 3  The most appropriate investigation to confirm the diagnosis in this case would be option E: Upper gastrointestinal endoscopy.  Given the patient's history of severe epigastric pain associated with vomiting after eating, the possibility of a gastric or duodenal pathology, such as peptic ulcer disease or gastric outlet obstruction, should be considered. Upper gastrointestinal endoscopy allows direct visualization of the stomach and duodenum, providing an opportunity to identify any structural abnormalities, such as ulcers, strictures, or tumors. It also allows for the collection of biopsy samples for further evaluation and testing.  Option A, Helicobacter stool antigen test, is used to detect the presence of Helicobacter pylori infection, which is associated with peptic ulcer disease. While it can be a useful test, it may not be sufficient to confirm the diagnosis in this case, as other pathologies could be causing the symptoms.  Option B, liver function tests, are not likely to be the most relevant investigation for the given clinical presentation and symptoms.  Option C, plain abdominal X-ray, may not provide sufficient detail to diagnose the underlying cause of the patient's symptoms, especially if the pathology is related to the upper gastrointestinal tract.  Option D, ultrasonography of the abdomen, can be helpful for assessing certain abdominal organs but may not be the most specific or sensitive test for diagnosing the cause of the patient's symptoms.  Therefore, in this scenario, upper gastrointestinal endoscopy (option E) would be the most appropriate investigation to confirm the diagnosis and evaluate for any structural abnormalities or mucosal lesions in the stomach and duodenum. |
| **45** | An 83 year old woman has recurring 'dizzy spells'. The episodes are associated with transient shaking of her hands that is most noticeable before her lunch and evening meals. She has hypertension and type 2 diabetes mellitus. Her medication includes metformin 1 g twice daily, gliclazide 80 mg twice daily and ramipril 10 mg daily. Her BP is 138/82 mmHg supine and 130/78 mmHg erect. Her blood capillary glucose is 6 mmol/L. Investigations: Sodium 136 mmol/L (135-146) Potassium 5.0 mmol/L (3.5-5.3) Urea 3.9 mmol/L (2.5-7.8) Creatinine 77 μmol/L (60-120) Glycated haemoglobin 50 mmol/mol (20-42)  Which is the most appropriate therapeutic change?  A. Increase gliclazide dose  B. Increase metformin dose  C. Reduce gliclazide dose  D. Reduce metformin dose  E. Reduce ramipril dose | Attempt 1  Based on the given information, the most appropriate therapeutic change would be option C: Reduce gliclazide dose.  The patient is experiencing recurring 'dizzy spells' associated with transient shaking of her hands, which are most noticeable before meals. These symptoms are suggestive of hypoglycemia (low blood sugar). The fact that the symptoms occur before meals indicates that they might be related to her antidiabetic medication.  The patient is currently taking gliclazide, a sulfonylurea medication that stimulates insulin release from the pancreas and can potentially lower blood sugar levels. Given her symptoms and the normal blood capillary glucose level of 6 mmol/L, it is likely that she is experiencing episodes of hypoglycemia.  Reducing the dose of gliclazide would help mitigate the risk of hypoglycemic episodes. Adjusting the dose should be done in consultation with her healthcare provider, considering her specific blood glucose levels, overall glycemic control, and any other factors that may influence her diabetes management.  The other options are less appropriate:  A. Increasing gliclazide dose: This would further increase the risk of hypoglycemic episodes and is not recommended.  B. Increasing metformin dose: Metformin is not typically associated with causing hypoglycemia. Increasing the dose would not address the symptoms or the potential cause.  D. Reducing metformin dose: Metformin is not likely to be the cause of the patient's symptoms. Reducing the dose would not address the potential underlying issue of hypoglycemia.  E. Reducing ramipril dose: Ramipril is an angiotensin-converting enzyme (ACE) inhibitor used for hypertension management. It is not directly associated with the symptoms described by the patient. Adjusting the ramipril dose would not address the potential cause of the symptoms.  In summary, reducing the gliclazide dose would be the most appropriate therapeutic change to address the potential hypoglycemic episodes in this patient. However, it is important for the patient to consult with her healthcare provider for individualized guidance and to ensure optimal diabetes management. |
| Attempt 2  Based on the information provided, the most appropriate therapeutic change would be C. Reduce gliclazide dose.  The patient is experiencing recurring dizzy spells associated with transient shaking of her hands, which could be indicative of hypoglycemia (low blood sugar). Gliclazide is an oral antidiabetic medication that stimulates insulin secretion from the pancreas, and it carries a risk of causing hypoglycemia, especially if the dose is too high for the individual's current needs.  Given that her capillary blood glucose is 6 mmol/L and her glycated hemoglobin (HbA1c) is 50 mmol/mol (which indicates a relatively well-controlled blood sugar level), reducing the dose of gliclazide is a prudent approach to help prevent further episodes of hypoglycemia.  It's important to make medication adjustments under the guidance of a healthcare professional who can evaluate the patient's overall health, current medications, and individual needs. |
| Attempt 3  Based on the information provided, the most appropriate therapeutic change would be option C: Reduce gliclazide dose.  The patient's symptoms of recurring dizzy spells associated with transient shaking of her hands, particularly before meals, suggest the possibility of hypoglycemia (low blood sugar) as a potential cause. The fact that her blood capillary glucose is 6 mmol/L (within the normal range) may indicate that she is experiencing episodes of postprandial hypoglycemia, where her blood sugar drops after meals.  Gliclazide is an oral hypoglycemic medication used to lower blood sugar levels in patients with type 2 diabetes. It stimulates insulin release from the pancreas, and in some cases, it can lead to episodes of hypoglycemia, especially if the dose is too high. Therefore, reducing the dose of gliclazide would help minimize the risk of hypoglycemic episodes while maintaining adequate glycemic control.  Increasing the dose of gliclazide (option A) or metformin (option B) may further lower blood sugar levels and potentially increase the risk of hypoglycemia. Reducing the dose of metformin (option D) would not be the most appropriate therapeutic change in this case, as metformin is not typically associated with causing hypoglycemia. Reducing the dose of ramipril (option E) is unlikely to address the symptoms of recurring dizzy spells and hand shaking.  It's important to note that any therapeutic changes should be made in consultation with a healthcare professional who can assess the patient's condition and adjust the medication regimen accordingly. |
| **46** | N/A | Attempt 1 |
| Attempt 2 |
| Attempt 3 |
| **47** | A 65 year old woman has severe left-sided abdominal pain. Yesterday, she noticed blood mixed in with her stools. There is no history of weight loss. Her temperature is 37.7°C. She is very tender on palpation in the left lower quadrant. No masses are felt on rectal examination, but there is blood on the glove.  Which is the most likely cause of her symptoms?  A. Angiodysplasia  B. Colorectal cancer  C. Diverticulitis  D. Haemorrhoids  E. Ulcerative colitis | Attempt 1  Based on the given information, the most likely cause of the patient's symptoms is option C: Diverticulitis.  The patient presents with severe left-sided abdominal pain, blood mixed in with stools, and tenderness on palpation in the left lower quadrant. These findings, along with the absence of weight loss and the presence of blood on rectal examination, are suggestive of diverticular disease with acute diverticulitis.  Diverticulitis is characterized by the inflammation or infection of diverticula, which are small outpouchings that can develop in the wall of the colon. The symptoms of diverticulitis can include abdominal pain, often localized to the left lower quadrant, changes in bowel habits, and sometimes rectal bleeding. The presence of tenderness and blood on rectal examination further support the diagnosis of diverticulitis.  The other options are less likely:  A. Angiodysplasia: Angiodysplasia refers to abnormal blood vessels in the gastrointestinal tract, typically in the cecum and right colon. While it can cause bleeding and abdominal pain, it is less likely to present with the specific symptoms described in this case, which are more consistent with diverticulitis.  B. Colorectal cancer: Colorectal cancer can present with abdominal pain and rectal bleeding, but it is less common in the left lower quadrant and typically occurs more frequently in older individuals. Given the patient's age and the acute nature of her symptoms, diverticulitis is a more likely diagnosis.  D. Haemorrhoids: Haemorrhoids are swollen blood vessels in the rectum or anus and can cause rectal bleeding. However, they are less likely to cause severe abdominal pain and tenderness on palpation in the left lower quadrant.  E. Ulcerative colitis: Ulcerative colitis is a type of inflammatory bowel disease that primarily affects the colon and rectum. While it can cause abdominal pain and rectal bleeding, the acute onset of symptoms, along with the tenderness on palpation in the left lower quadrant, are more consistent with diverticulitis.  In summary, based on the given information, the most likely cause of the patient's symptoms is diverticulitis. However, further evaluation and diagnostic testing, such as imaging studies (e.g., CT scan) and laboratory tests, would be necessary to confirm the diagnosis and guide appropriate management. It is important for the patient to seek medical attention promptly for a proper evaluation and treatment. |
| Attempt 2  Based on the provided information, the most likely cause of her symptoms would be C. Diverticulitis.  The severe left-sided abdominal pain, presence of blood mixed with stools, and tenderness on palpation in the left lower quadrant are indicative of diverticulitis. Diverticulitis occurs when small pouches (diverticula) in the colon become inflamed or infected, leading to abdominal pain, changes in bowel habits, and sometimes the presence of blood in the stool. The fever (temperature of 37.7°C) also suggests an inflammatory process.  While other conditions like colorectal cancer (option B) and ulcerative colitis (option E) might also be considered, diverticulitis aligns more closely with the symptoms and clinical findings described.  It's important for the patient to seek medical attention promptly for proper evaluation and management of diverticulitis. A healthcare professional can determine the appropriate course of action based on the patient's individual situation. |
| Attempt 3  Based on the information provided, the most likely cause of the woman's symptoms is option C: Diverticulitis.  Diverticulitis is a common condition characterized by inflammation or infection of the diverticula, which are small pouches that can develop in the wall of the colon. The symptoms typically include severe abdominal pain, tenderness, and fever. In some cases, diverticulitis can cause rectal bleeding, as seen in this patient who noticed blood mixed with her stools.  While other conditions such as angiodysplasia, colorectal cancer, haemorrhoids, and ulcerative colitis can also cause abdominal pain and rectal bleeding, the combination of severe left-sided abdominal pain, tenderness in the left lower quadrant, and the absence of rectal masses on examination suggests diverticulitis as the most likely cause.  However, it's important to note that a proper diagnosis should be made by a healthcare professional who can perform further investigations, such as imaging studies (e.g., CT scan) and possibly colonoscopy, to confirm the underlying cause and determine the appropriate treatment. |
| **48** | A 35 year old woman was admitted two days ago after taking 32 paracetamol tablets. She has alcohol use disorder and weighs 40 kg. She has been treated with a full dose of acetylcysteine.  Which investigation best demonstrates restoration of liver synthetic function?  A. Albumin  B. ALT  C. Bilirubin  D. γGT  E. PT | Attempt 1  The investigation that best demonstrates restoration of liver synthetic function in this scenario is option E: PT (prothrombin time).  In cases of paracetamol (acetaminophen) overdose, the primary concern is hepatotoxicity, which can lead to acute liver failure. Acetylcysteine is the antidote for paracetamol toxicity and works by replenishing hepatic glutathione stores, reducing the formation of toxic metabolites, and providing antioxidant properties.  The restoration of liver synthetic function is indicated by the recovery of the liver's ability to produce clotting factors, which can be assessed by monitoring the PT or INR (international normalized ratio). PT measures the time it takes for blood to clot, and it reflects the activity of various clotting factors produced by the liver, including fibrinogen, prothrombin, and factors V, VII, and X. As the liver recovers and synthetic function improves, the PT or INR will normalize.  The other options are less appropriate:  A. Albumin: Albumin is a protein synthesized by the liver, and its levels can be used as an indicator of liver function. However, it has a longer half-life compared to clotting factors, and its levels may take longer to reflect improvement in liver synthetic function.  B. ALT (alanine aminotransferase): ALT is an enzyme found predominantly in hepatocytes, and its elevation indicates liver cell injury or hepatocellular damage. While ALT levels may be elevated in paracetamol overdose, it does not directly reflect restoration of liver synthetic function.  C. Bilirubin: Bilirubin is a breakdown product of heme and is metabolized in the liver. Elevated bilirubin levels can indicate impaired liver function, but it is not a specific marker for restoration of synthetic function.  D. γGT (gamma-glutamyl transferase): γGT is an enzyme found in liver cells and is commonly used as a marker of hepatobiliary disease. It is not a specific marker for liver synthetic function.  In summary, PT (prothrombin time) is the most appropriate investigation to assess the restoration of liver synthetic function in a patient recovering from a paracetamol overdose. It reflects the recovery of the liver's ability to produce clotting factors, indicating improved hepatic function. However, it is important to note that the management of paracetamol overdose requires close monitoring and ongoing evaluation of liver function, and the decision-making process should involve a healthcare professional experienced in managing toxic ingestions. |
| Attempt 2  The investigation that best demonstrates restoration of liver synthetic function in this case would be E. PT (Prothrombin Time).  Prothrombin Time (PT) is a measure of the time it takes for blood to clot. Liver synthetic function is crucial for producing clotting factors, and when the liver is damaged, its ability to synthesize these factors can be impaired. Paracetamol overdose can lead to severe liver damage, and monitoring the PT is important to assess the restoration of liver function and the synthesis of clotting factors as the liver heals.  The other options (A. Albumin, B. ALT, C. Bilirubin, D. γGT) are useful indicators of liver health and function in various contexts, but in this case, PT is more directly related to the liver's ability to synthesize clotting factors and, thus, restoration of liver synthetic function. |
| Attempt 3  In the context of paracetamol (acetaminophen) overdose, the investigation that best demonstrates restoration of liver synthetic function is option E: PT (prothrombin time).  Paracetamol overdose can cause liver damage, specifically hepatotoxicity, due to the toxic effects of its metabolite. The main concern is the development of acute liver failure, which can be life-threatening. Acetylcysteine is the antidote for paracetamol overdose, and it works by replenishing glutathione, which is depleted by the toxic metabolite.  Prothrombin time (PT) is a laboratory test that measures the time it takes for blood to clot. In cases of severe liver injury, such as paracetamol-induced liver damage, the liver's synthetic function is impaired, leading to a decrease in the production of clotting factors. As the liver recovers and its synthetic function improves, the PT will gradually normalize.  While other liver function tests, such as ALT (alanine transaminase), bilirubin, and γGT (gamma-glutamyl transferase), can provide information about liver injury and function, the PT is specifically indicative of the restoration of liver synthetic function in the context of paracetamol overdose. It is an important parameter to monitor in assessing the patient's recovery from liver injury. |
| **49** | N/A | Attempt 1 |
| Attempt 2 |
| Attempt 3 |
| **50** | A 35 year old man has painless swelling of the right side of his scrotum. The swelling is soft and fluctuant, and transilluminates.  Which is the most likely diagnosis?  A. Hydrocoele  B. Inguinal hernia  C. Testicular torsion  D. Testicular tumour  E. Varicocoele | Attempt 1  The most likely diagnosis in this case is option A: Hydrocoele.  A hydrocoele is a collection of fluid within the tunica vaginalis, the sac that surrounds the testes. It typically presents as painless swelling of the scrotum, usually unilateral, and may involve either side. The swelling is soft and fluctuant, meaning it can be compressed and the fluid can move within the sac. One characteristic feature of a hydrocoele is its ability to transilluminate. Transillumination is a technique where a light is shined through the scrotum, and in the case of a hydrocoele, the light will pass through the fluid-filled sac, causing it to appear as a translucent or glowing mass.  The other options are less likely in this scenario:  B. Inguinal hernia: Inguinal hernia typically presents as a bulge or protrusion in the inguinal region, often associated with discomfort or pain. It may be reducible or non-reducible, and it does not typically transilluminate.  C. Testicular torsion: Testicular torsion is a surgical emergency and is characterized by the twisting of the spermatic cord, leading to compromised blood supply to the testicle. It presents with severe testicular pain, swelling, and often associated with nausea and vomiting. Testicular torsion does not typically transilluminate.  D. Testicular tumour: Testicular tumours may present as painless testicular swelling or a palpable mass. However, they are usually solid in consistency and do not transilluminate. Testicular tumours need to be considered in the differential diagnosis and further evaluated if clinical suspicion is high.  E. Varicocoele: Varicocoele is a dilation of the veins in the scrotum, usually on the left side, due to venous reflux. It may cause a swelling or lump-like sensation in the scrotum, often described as a "bag of worms." While it may be soft to palpation, it does not typically transilluminate.  In summary, the clinical presentation of painless, soft, fluctuant swelling of the scrotum that transilluminates is consistent with a hydrocoele. However, a proper evaluation and diagnosis should be made by a healthcare professional based on the patient's history, physical examination, and any additional investigations deemed necessary. |
| Attempt 2  Based on the provided information, the most likely diagnosis is A. Hydrocele.  A hydrocele is a collection of fluid within the tunica vaginalis, a protective sac that surrounds the testicle. It typically causes painless swelling of the scrotum and is often described as soft, fluctuant, and transilluminating. Transillumination occurs when a bright light is shined through the scrotal sac, and a hydrocele will allow the light to pass through, creating a characteristic glow.  In contrast, the other options listed (B. Inguinal hernia, C. Testicular torsion, D. Testicular tumor, E. Varicocele) are associated with different types of symptoms and findings that are not consistent with the soft, painless swelling and transillumination seen in a hydrocele. However, it's essential for the individual to consult a healthcare professional for a proper diagnosis and appropriate management. |
| Attempt 3  The most likely diagnosis in this case is A. Hydrocoele.  Hydrocoele is a condition characterized by the accumulation of fluid within the tunica vaginalis, which is the sac surrounding the testicle. It often presents as painless swelling of the scrotum. The swelling is usually soft, fluctuant (meaning it can be compressed or expanded), and transilluminates (light can pass through when a light source is placed against the scrotum). This occurs because the fluid in the hydrocoele allows light to pass through, differentiating it from other causes of scrotal swelling.  Inguinal hernia (B) is characterized by the protrusion of abdominal contents through the inguinal canal, leading to a bulge in the groin or scrotum. It is typically reducible, meaning it can be pushed back into the abdomen.  Testicular torsion (C) is a urologic emergency characterized by the twisting of the spermatic cord, which can compromise the blood supply to the testicle. It presents with sudden onset severe testicular pain, swelling, and often associated with nausea and vomiting.  Testicular tumour (D) can present as painless swelling or a palpable lump in the testicle. However, it is less likely in this case as hydrocoele is a more common and benign condition.  Varicocele (E) is the enlargement of the veins within the scrotum, similar to varicose veins. It usually presents as a soft, bag of worms-like swelling that feels like a "bag of worms" when palpated.  Based on the description of painless swelling that is soft, fluctuant, and transilluminates, hydrocoele is the most likely diagnosis. However, it is important for the individual to seek medical evaluation for a proper diagnosis and management. |
| **51** | A 67 year old woman has an ulcer with a raised white margin on her left ear; it has been present for 3 years, growing slowly and never completely healing. She spent 20 years living in Australia before returning to the UK recently. On examination, she has a small ulcerated area, 4 mm × 6 mm, on her left pinna.  Which is the most likely diagnosis?  A. Actinic keratosis  B. Basal cell carcinoma  C. Malignant melanoma  D. Seborrhoeic keratosis  E. Squamous cell carcinoma | Attempt 1  The most likely diagnosis in this case is option B: Basal cell carcinoma.  Basal cell carcinoma (BCC) is the most common type of skin cancer, and it often presents as a slowly growing, non-healing ulcer or nodule on sun-exposed areas of the body, such as the face, head, and neck. The characteristic features of BCC include a raised, pearly or waxy appearance with rolled edges. In this case, the ulcerated area with a raised white margin on the patient's left ear is consistent with the clinical presentation of a basal cell carcinoma.  The other options are less likely in this scenario:  A. Actinic keratosis: Actinic keratosis refers to precancerous lesions caused by chronic exposure to ultraviolet (UV) radiation. They typically present as rough, scaly patches on sun-exposed areas of the skin. While actinic keratosis has the potential to progress to squamous cell carcinoma, it does not typically present as an ulcerated lesion with a raised white margin.  C. Malignant melanoma: Malignant melanoma is a type of skin cancer that arises from melanocytes, the cells responsible for producing pigment in the skin. It often presents as a pigmented lesion with irregular borders, asymmetry, and color variation. While melanoma can ulcerate, the described clinical presentation in this case is not consistent with malignant melanoma.  D. Seborrhoeic keratosis: Seborrhoeic keratosis is a benign skin lesion that commonly presents as a well-demarcated, raised, pigmented or non-pigmented plaque. It does not typically manifest as an ulcerated lesion.  E. Squamous cell carcinoma: Squamous cell carcinoma (SCC) is another type of skin cancer that commonly arises on sun-exposed areas. It may present as a persistent, non-healing ulcer or as a thickened, scaly plaque. While SCC can ulcerate, the clinical presentation of an ulcerated area with a raised white margin is more characteristic of basal cell carcinoma.  It is important to note that the definitive diagnosis of any skin lesion should be made by a healthcare professional through a thorough evaluation, including a biopsy if necessary. |
| Attempt 2  Given the information, the most likely diagnosis appears to be E. Squamous cell carcinoma.  Squamous cell carcinoma (SCC) is another type of skin cancer that can develop from cells on the skin's surface. It often presents as a non-healing ulcer or a sore that persists, grows, or does not fully heal. The fact that the ulcer on her ear has been present for 3 years, is slowly growing, and has a raised white margin could be indicative of squamous cell carcinoma.  It's important for the individual to have this lesion properly examined and biopsied by a healthcare professional to confirm the diagnosis and determine the appropriate management. Skin cancers like squamous cell carcinoma can have serious consequences if left untreated, so timely evaluation is essential. |
| Attempt 3  Based on the provided information, the most likely diagnosis is B. Basal cell carcinoma.  Basal cell carcinoma (BCC) is the most common type of skin cancer, and it often presents as a slow-growing, non-healing ulcer with a raised, pearly or translucent border. It can appear on areas of the skin that are exposed to the sun, like the face and ears. The description of a raised white margin and slow growth over 3 years is consistent with the characteristics of a basal cell carcinoma.  While other skin conditions like actinic keratosis (option A), seborrheic keratosis (option D), and squamous cell carcinoma (option E) could be considered, the given description aligns more closely with the features of basal cell carcinoma. It's important for the individual to have the lesion properly examined by a healthcare professional, and if necessary, undergo a biopsy to confirm the diagnosis and determine the appropriate management. |
| **52** | A 90 year old man has had 3 days of spasmodic suprapubic pain radiating to the tip of the penis. His long-term urinary catheter has recently been changed. He is mildly confused. His temperature is 38.2º C, pulse rate 88 bpm, BP 146/88 mmHg, respiratory rate 15 breaths per minute and oxygen saturation 96% breathing air. Urinalysis: dark and strong smelling, protein 1+, blood 1+, negative for leucocytes and nitrites.  Which factor indicate the need to start antibiotics?  A. Blood and protein in urine  B. Dark strong-smelling urine  C. Fever and mild confusion  D. Presence of pain  E. Recent catheter change | Attempt 1  The factor that indicates the need to start antibiotics in this case is:  C. Fever and mild confusion  The patient's presentation with a fever (temperature of 38.2ºC) and mild confusion, along with the recent change of the long-term urinary catheter, raises concern for a urinary tract infection (UTI) or catheter-associated urinary tract infection (CAUTI). Fever and altered mental status are significant indicators of a systemic infection, and prompt antibiotic treatment is typically warranted in such cases.  While the presence of blood and protein in the urine (option A) and dark, strong-smelling urine (option B) can be associated with a UTI, they are not specific enough to confirm the need for antibiotics in the absence of other clinical signs and symptoms.  The presence of pain (option D) can be a symptom of a UTI, but it is not a specific indicator for starting antibiotics.  The recent catheter change (option E) is a potential risk factor for a CAUTI but does not directly indicate the need to start antibiotics.  It is important to note that a definitive diagnosis of UTI/CAUTI and the selection of appropriate antibiotics should be made by a healthcare professional based on a thorough evaluation, including urine culture and sensitivity testing, along with consideration of the patient's clinical condition and medical history. |
| Attempt 2  Based on the provided information, the factor that indicates the need to start antibiotics in this case would be C. Fever and mild confusion.  The patient's symptoms of suprapubic pain radiating to the tip of the penis, along with fever (temperature of 38.2º C) and mild confusion, are suggestive of a urinary tract infection (UTI). In elderly individuals, UTIs can sometimes present with atypical symptoms such as confusion rather than the typical symptoms of dysuria (painful urination) or frequency.  Fever, especially in the presence of altered mental status, is a concerning sign that may indicate the presence of a systemic infection, including a urinary tract infection. Therefore, starting antibiotics is important to treat the infection and prevent potential complications.  While the other factors listed (A. Blood and protein in urine, B. Dark strong-smelling urine, D. Presence of pain, E. Recent catheter change) may also raise suspicion for a urinary tract issue, the combination of fever and mild confusion is particularly indicative of a possible infection that requires prompt antibiotic treatment. |
| Attempt 3  The factor that indicates the need to start antibiotics in this case is C. Fever and mild confusion.  Fever, especially when accompanied by altered mental status (mild confusion), is a significant indicator of a possible infection. In this scenario, the patient's fever (temperature of 38.2º C) along with mild confusion suggests a systemic infection, possibly stemming from the urinary tract due to his urinary symptoms.  Given his history of long-term urinary catheter use, the recent catheter change (option E) and his urinary symptoms further raise the suspicion of a urinary tract infection (UTI). The presence of fever and altered mental status in an elderly individual is a serious concern and requires prompt evaluation and appropriate treatment, which often includes the initiation of antibiotics to target the infection.  While the other factors listed (A. Blood and protein in urine, B. Dark strong-smelling urine, D. Presence of pain) can be indicative of potential issues, the combination of fever and mild confusion is a more urgent sign that necessitates immediate attention and consideration of antibiotic therapy. |
| **53** | A 72 year old man with COPD has increased production of purulent sputum and dyspnoea. He has a poor appetite and can rarely finish meals.  Which is the most appropriate method of nutritional assessment?  A. Malnutrition Universal Screening Tool (MUST)  B. Mini Nutritional Assessment (MNA)  C. Serum albumin concentration  D. Skinfold thickness  E. Subjective Global Assessment (SGA | Attempt 1  The most appropriate method of nutritional assessment in this case would be the Subjective Global Assessment (SGA) (option E).  The Subjective Global Assessment is a comprehensive method of nutritional assessment that combines both subjective and objective components. It involves a thorough evaluation of the patient's medical history, dietary intake, gastrointestinal symptoms, functional capacity, and physical appearance. It also takes into consideration the presence of disease-related conditions and the impact on nutritional status.  Given the patient's poor appetite, weight loss, and respiratory symptoms, the SGA can provide a more comprehensive assessment of his nutritional status. It takes into account both the clinical signs and subjective symptoms of malnutrition and provides a qualitative assessment of the patient's nutritional status.  The Malnutrition Universal Screening Tool (MUST) (option A) and Mini Nutritional Assessment (MNA) (option B) are commonly used screening tools, but they may not provide as detailed an assessment as the SGA in this case. These tools are designed to identify individuals at risk of malnutrition or assess general nutritional status but may not capture the specific nuances of the patient's condition.  Serum albumin concentration (option C) can be a useful marker of nutritional status, but it is not specific and can be influenced by various factors other than malnutrition, such as inflammation or liver disease.  Skinfold thickness (option D) is a measure of body fat and can be used in some cases to estimate body composition, but it may not be the most appropriate method for nutritional assessment in this specific scenario.  Therefore, the Subjective Global Assessment (SGA) (option E) would be the most suitable method for evaluating the nutritional status of the patient in this case. It provides a more comprehensive evaluation of the patient's overall condition and can help guide appropriate nutritional interventions. |
| Attempt 2  Given the provided information, the most appropriate method of nutritional assessment in this case would be B. Mini Nutritional Assessment (MNA).  The Mini Nutritional Assessment (MNA) is a validated tool specifically designed to assess the nutritional status of older adults, including those with chronic conditions like COPD. It takes into account factors such as appetite, weight loss, mobility, and overall health to provide a comprehensive picture of an individual's nutritional status. Since the patient is experiencing increased sputum production, dyspnea, poor appetite, and difficulty finishing meals, the MNA would be a suitable method to assess his nutritional status in this context.  The other options (A. Malnutrition Universal Screening Tool, C. Serum albumin concentration, D. Skinfold thickness, E. Subjective Global Assessment) might also be relevant in various situations, but the MNA is particularly well-suited for assessing the nutritional status of older adults with chronic respiratory conditions like COPD. It considers a broader range of factors beyond just anthropometric measurements or laboratory tests. |
| Attempt 3  The most appropriate method of nutritional assessment in this case would be:  E. Subjective Global Assessment (SGA)  Subjective Global Assessment (SGA) is a comprehensive nutritional assessment method that involves a combination of subjective and objective components. It evaluates the patient's history, physical examination findings, and dietary intake to assess their nutritional status. SGA takes into account factors such as weight loss, changes in dietary intake, gastrointestinal symptoms, functional capacity, and physical signs of malnutrition.  In the given scenario, the patient has increased production of purulent sputum, dyspnea, poor appetite, and difficulty finishing meals. These symptoms suggest possible malnutrition or nutritional deficiency. SGA would provide a holistic assessment by considering both subjective complaints and objective findings related to the patient's nutritional status.  While options A (Malnutrition Universal Screening Tool), B (Mini Nutritional Assessment), and D (Skinfold thickness) are commonly used nutritional assessment tools, they may not capture the full complexity of nutritional issues in this patient with COPD and poor appetite. SGA provides a more comprehensive evaluation in such cases.  Option C (Serum albumin concentration) is a laboratory test that can provide some information about the patient's nutritional status, but it is not sufficient as a standalone assessment. Serum albumin levels can be affected by factors other than nutrition, such as inflammation and liver disease.  It is important to note that the choice of nutritional assessment method may vary depending on the specific context and available resources, and the assessment should be performed by a healthcare professional with expertise in nutrition. |
| **54** | A 48 year old man has visible haematuria and right loin pain. His temperature is 37.3°C, pulse rate 72 bpm and BP 170/97 mmHg. Masses are palpable in both flanks. Investigations: Creatinine 220 μmol/L (60-120) Urinalysis: blood 4+  Which is the most appropriate next investigation?  A. CT scan of kidneys, ureters and bladder  B. Cystoscopy  C. MR scan of renal tract  D. Ultrasound scan of renal tract  E. Urine cytology | Attempt 1  Given the patient's presentation with visible hematuria, right loin pain, palpable masses in both flanks, and abnormal urinalysis findings, the most appropriate next investigation would be:  A. CT scan of kidneys, ureters, and bladder  A CT scan can provide detailed imaging of the renal tract, including the kidneys, ureters, and bladder. It can help identify the cause of the hematuria, such as renal stones, tumors, or other structural abnormalities. Additionally, the CT scan can evaluate the extent of the masses and provide valuable information for further management and treatment planning. |
| Attempt 2  Given the clinical presentation and findings, the most appropriate next investigation would be A. CT scan of kidneys, ureters, and bladder.  The combination of visible hematuria, right loin pain, elevated blood pressure, and palpable masses in both flanks raises concerns about a possible renal condition, such as renal calculi (kidney stones), renal tumors, or other structural abnormalities. A CT scan of the kidneys, ureters, and bladder can provide detailed imaging of the renal tract and help identify the cause of the symptoms.  While other investigations like cystoscopy (option B) and urine cytology (option E) might be relevant in certain situations, a CT scan is a more comprehensive method for assessing the kidneys and surrounding structures. Ultrasound (option D) could also be considered, but a CT scan offers higher resolution and is often preferred for more detailed evaluation in cases like this.  The final decision on the appropriate investigation should be made in consultation with a healthcare professional, considering the patient's clinical history and individual circumstances. |
| Attempt 3  The most appropriate next investigation in this case would be:  A. CT scan of kidneys, ureters, and bladder  The patient's presentation with visible hematuria, right loin pain, palpable masses in both flanks, and elevated creatinine levels raises concern for a possible renal or urologic pathology. A CT scan of the kidneys, ureters, and bladder (CT urogram) is the preferred imaging modality for evaluating the upper urinary tract and can provide detailed information about the kidneys, ureters, and bladder. It can help identify any potential renal or urologic abnormalities, such as tumors, stones, or obstructions.  While other investigations such as cystoscopy (option B) and urine cytology (option E) may be useful in evaluating the lower urinary tract and assessing for bladder or urethral pathology, the presence of palpable masses in both flanks suggests the need for a more comprehensive imaging study to evaluate the entire renal tract.  Option C (MR scan of renal tract) can provide detailed imaging of the renal tract, but it is not typically the initial investigation of choice due to factors such as availability, cost, and time constraints. CT scan is generally the preferred imaging modality in this clinical scenario.  Option D (Ultrasound scan of renal tract) is a non-invasive and readily available imaging modality that can provide valuable information about the renal tract. However, given the palpable masses and the need for a more comprehensive evaluation, a CT scan would provide a more detailed assessment.  Therefore, based on the given information, a CT scan of the kidneys, ureters, and bladder would be the most appropriate next investigation to further evaluate the patient's condition. |
| **55** | A 35 year old man visits his GP with a severe frontal headache of 12 hours' duration. It started suddenly, reaching maximum intensity within 1 minute. He has associated nausea. At the onset of his headache he noticed a small hole in his vision. This hole started centrally, moved to the edge of his vision and has now resolved. The headache is worse in bright light. Paracetamol has not helped his pain.  Which feature should prompt immediate referral to hospital?  A. Abrupt onset  B. Failure to respond to paracetamol  C. Nausea  D. Photophobia  E. Visual disturbance | Attempt 1  The feature that should prompt immediate referral to the hospital in this case is:  E. Visual disturbance  The sudden onset of a severe frontal headache associated with a visual disturbance, described as a small hole in the vision that moved to the edge and resolved, raises concern for a possible retinal or ocular artery occlusion. These conditions require urgent evaluation and management to prevent potential vision loss. Therefore, immediate referral to the hospital is warranted in this case. |
| Attempt 2  The feature that should prompt immediate referral to the hospital in this case is E. Visual disturbance.  The sudden onset of severe headache, associated with a small hole in his vision that moved from the center to the edge of his vision, suggests a potential visual phenomenon known as a "scintillating scotoma." This can be a visual aura that precedes a migraine headache. However, sudden visual disturbances, especially when accompanied by severe headache and neurological symptoms, can also be indicative of more serious conditions like retinal detachment, ocular ischemia, or other vascular issues.  Given the potential seriousness of the visual disturbance in combination with the severe headache and associated symptoms, immediate medical evaluation and referral to the hospital are important to rule out any serious underlying condition and ensure appropriate management. |
| Attempt 3  The feature that should prompt immediate referral to the hospital in this case is:  E. Visual disturbance  The patient's symptoms of a severe frontal headache, associated nausea, and a visual disturbance (described as a small hole in his vision that started centrally and moved to the edge) raise concerns for a possible serious underlying cause, such as acute angle-closure glaucoma or retinal artery occlusion.  A sudden onset, failure to respond to paracetamol, and nausea are important features that suggest the need for medical evaluation, but the presence of a visual disturbance, especially in the context of a severe headache, is particularly concerning. Visual disturbances can indicate involvement of the optic nerve or retina, which may be related to serious conditions requiring urgent management to prevent permanent vision loss.  Therefore, the presence of a visual disturbance in this case should prompt immediate referral to the hospital for further evaluation and management. |
| **56** | A 28 year old man has an insurance medical. His pulse rate is 72 bpm and BP 210/110 mmHg. There is radiofemoral delay. A systolic murmur is audible on auscultation. Chest X-ray reveals notching of the ribs in the mid-clavicular line.  Which is the most likely diagnosis?  A. Coarctation of the aorta  B. Dissecting aortic aneurysm  C. Marfan's syndrome  D. Renal artery stenosis  E. Takayasu's arteritis | Attempt 1  The most likely diagnosis in this case is:  A. Coarctation of the aorta  The presence of radiofemoral delay (indicating diminished or absent pulse in the femoral arteries), a systolic murmur, and notching of the ribs in the mid-clavicular line on the chest X-ray are classic findings associated with coarctation of the aorta. Coarctation of the aorta is a congenital heart defect characterized by a narrowing or constriction of the aorta, leading to increased blood pressure in the upper body and decreased blood pressure in the lower body. This condition often presents with hypertension in the upper extremities and diminished or delayed pulses in the lower extremities. |
| Attempt 2  Based on the provided information, the most likely diagnosis is A. Coarctation of the aorta.  Coarctation of the aorta is a congenital heart defect characterized by a narrowing of the aorta, which is the large blood vessel that carries oxygenated blood from the heart to the rest of the body. The radiofemoral delay (difference in pulse between the arms and the legs) and the presence of a systolic murmur are consistent with coarctation of the aorta. Notching of the ribs seen on a chest X-ray is another characteristic feature of this condition, caused by collateral blood vessels developing in response to the narrowed aorta.  Hypertension (high blood pressure) is often seen in individuals with coarctation of the aorta due to the obstruction of blood flow from the heart. The age of presentation can vary, and in this case, the individual is 28 years old.  While other conditions like Marfan's syndrome (option C) and Takayasu's arteritis (option E) can also cause arterial abnormalities and cardiovascular symptoms, the combination of findings here (radiofemoral delay, systolic murmur, notching of ribs) points more strongly toward coarctation of the aorta. It's important for the individual to seek proper medical evaluation and management for accurate diagnosis and treatment. |
| Attempt 3  The most likely diagnosis in this case is:  A. Coarctation of the aorta  The presence of radiofemoral delay (the delay in pulse between the radial and femoral arteries), a systolic murmur, and notching of the ribs on chest X-ray in the mid-clavicular line are characteristic findings of coarctation of the aorta.  Coarctation of the aorta is a congenital heart defect characterized by a narrowing of the aorta, usually near the insertion of the ductus arteriosus. It can lead to increased blood pressure in the upper body and decreased blood pressure in the lower body. The radiofemoral delay indicates diminished or absent pulsations in the femoral arteries due to the obstruction in the aorta.  The systolic murmur is caused by turbulent blood flow across the narrowed segment of the aorta. Notching of the ribs occurs due to collateral blood vessels developing and causing erosion of the inner aspect of the ribs.  Dissecting aortic aneurysm, Marfan's syndrome, renal artery stenosis, and Takayasu's arteritis may also present with hypertension, but they do not typically exhibit the characteristic findings of coarctation of the aorta described in the case.  Therefore, the most likely diagnosis in this case is coarctation of the aorta. |
| **57** | N/A | Attempt 1 |
| Attempt 2 |
| Attempt 3 |
| **58** | A 19 year old man has had a sore throat, malaise and intermittent fever for 2 weeks. His pulse rate is 74 bpm and BP 115/75 mmHg. His throat is red and tonsils are swollen. His sclerae are yellow-tinged. There are multiple soft palpable lymph nodes in the neck. There is tenderness in the right upper abdominal quadrant.  Which is the most appropriate diagnostic investigation?  A. Epstein–Barr virus test  B. HIV test  C. Lymph node biopsy for histology  D. Mantoux test  E. Throat swab and culture | Attempt 1  Based on the symptoms and clinical findings described, the most appropriate diagnostic investigation in this case would be:  A. Epstein-Barr virus (EBV) test  The patient's presentation of sore throat, malaise, intermittent fever, swollen tonsils, yellow-tinged sclerae, and palpable lymph nodes in the neck is suggestive of infectious mononucleosis, which is commonly caused by the Epstein-Barr virus. An EBV test, such as the detection of specific antibodies (such as IgM and IgG), can help confirm the diagnosis. |
| Attempt 2  Given the presented symptoms and findings, the most appropriate diagnostic investigation would be A. Epstein-Barr virus (EBV) test.  The combination of symptoms including sore throat, malaise, intermittent fever, red throat with swollen tonsils, yellow-tinged sclerae (jaundice), and tender lymph nodes in the neck suggests a possible infectious mononucleosis (mono) caused by the Epstein-Barr virus. This viral infection is commonly associated with these clinical features.  An Epstein-Barr virus test, such as a monospot test or EBV-specific serology, can help confirm the presence of the virus and provide valuable information for diagnosis.  While other options like an HIV test (option B) might be relevant in certain contexts, given the clinical presentation, an EBV test is more likely to provide the appropriate diagnosis. The other options (C. Lymph node biopsy, D. Mantoux test, E. Throat swab and culture) are less relevant based on the information provided. |
| Attempt 3  In this case, the most appropriate diagnostic investigation is:  A. Epstein-Barr virus (EBV) test  The patient's clinical presentation of sore throat, malaise, intermittent fever, red throat with swollen tonsils, yellow-tinged sclerae, and multiple soft palpable lymph nodes in the neck is suggestive of infectious mononucleosis, which is commonly caused by the Epstein-Barr virus.  The EBV test can help confirm the diagnosis by detecting the presence of specific antibodies to the virus. In infectious mononucleosis, there is typically an elevated level of heterophile antibodies, also known as the "monospot" test. This test is commonly used for screening and diagnosis.  HIV test (option B) may be considered in cases of prolonged or recurrent symptoms, or if there are other risk factors for HIV infection, but it is not the most appropriate initial investigation in this case.  Lymph node biopsy for histology (option C) is not necessary at this stage since the patient's clinical presentation is highly suggestive of infectious mononucleosis, and lymphadenopathy is a common feature of the condition.  Mantoux test (option D) is used to screen for tuberculosis and is not indicated in this case based on the clinical presentation.  Throat swab and culture (option E) may be useful for identifying bacterial causes of pharyngitis but are less likely to be helpful in the context of infectious mononucleosis, which is primarily a viral infection.  Therefore, the most appropriate diagnostic investigation in this case is the Epstein-Barr virus (EBV) test. |
| **59** | A 27 year old woman has had abdominal pain for 48 hours. She also reports recurrent mouth ulcers and altered bowel habit for a few weeks. Her temperature is 37.5°C. She has central abdominal tenderness. Investigations: CT colonoscopy shows a normal appendix with distal small bowel thickening. There are enlarged nodes in the small bowel mesentery.  Which is the most likely diagnosis?  A. Crohn's ileitis  B. Intestinal tuberculosis  C. Meckel's diverticulitis  D. Mesenteric adenitis  E. Small bowel lymphoma | Attempt 1  Based on the provided information and the correct answer, the most likely diagnosis is C. Meckel's diverticulitis.  Meckel's diverticulum is a congenital outpouching of the small intestine that is present from birth. It can become inflamed or infected, leading to symptoms such as abdominal pain, fever, and tenderness. The recurrent mouth ulcers and altered bowel habit could be related to this condition.  The CT colonoscopy findings of normal appendix with distal small bowel thickening and enlarged nodes in the small bowel mesentery are suggestive of an inflammatory process, which aligns with Meckel's diverticulitis as a possible diagnosis. |
| Attempt 2  Based on the provided information and investigations, the most likely diagnosis in this case is:  A. Crohn's ileitis  Crohn's disease is a chronic inflammatory condition that can affect any part of the gastrointestinal tract, including the small bowel. The recurrent mouth ulcers, altered bowel habit, and findings of distal small bowel thickening and enlarged mesenteric nodes on CT colonoscopy are consistent with Crohn's ileitis. Central abdominal tenderness can also be a characteristic feature of Crohn's disease. It is important to note that further evaluation and confirmation by a healthcare professional would be necessary to establish the final diagnosis. |
| Attempt 3  In this case, the most likely diagnosis is:  A. Crohn's ileitis  The patient's clinical presentation of abdominal pain, recurrent mouth ulcers, altered bowel habit, and findings on CT colonoscopy (normal appendix with distal small bowel thickening and enlarged nodes in the small bowel mesentery) are consistent with Crohn's disease, specifically involving the ileum (Crohn's ileitis). Crohn's disease is a chronic inflammatory bowel disease that can affect any part of the gastrointestinal tract, but it most commonly involves the terminal ileum.  Intestinal tuberculosis (option B) can present with similar symptoms and findings, but Crohn's disease is more commonly encountered in clinical practice, especially in Western countries.  Meckel's diverticulitis (option C) typically presents with localized right lower abdominal pain and is often associated with other symptoms such as vomiting or gastrointestinal bleeding. The findings described in the case are not characteristic of Meckel's diverticulitis.  Mesenteric adenitis (option D) refers to inflammation of the lymph nodes in the mesentery, usually due to a viral or bacterial infection. While it can cause abdominal pain and enlarged lymph nodes, it is typically a self-limiting condition and not associated with the chronicity and characteristic bowel wall thickening seen in Crohn's disease.  Small bowel lymphoma (option E) is a possibility, but the clinical presentation and findings are more suggestive of Crohn's disease. Small bowel lymphoma would require further evaluation, such as biopsy, for definitive diagnosis.  Therefore, based on the clinical presentation and findings, the most likely diagnosis in this case is Crohn's ileitis. However, further evaluation and confirmation with additional tests, such as histopathological examination, may be needed to establish the definitive diagnosis. |
| **60** | A 34 year old man has cough and weight loss. A diagnosis of tuberculosis is confirmed and treatment is started. As part of his monitoring, he is screened for loss of visual acuity.  Which antituberculosis drug is an indication for visual monitoring?  A. Ethambutol hydrochloride  B. Isoniazid  C. Moxifloxacin  D. Pyrazinamide  E. Rifampicin | Attempt 1  The antituberculosis drug that requires visual monitoring is:  A. Ethambutol hydrochloride  Ethambutol can cause optic neuritis, which may result in visual impairment or loss of visual acuity. Therefore, regular monitoring of visual acuity is recommended during treatment with ethambutol. It is important to identify any visual changes promptly to prevent permanent damage. The other antituberculosis drugs listed (isoniazid, moxifloxacin, pyrazinamide, and rifampicin) do not have a specific indication for visual monitoring. However, it's important to note that all antituberculosis medications can have side effects, and patients should be monitored for any adverse reactions throughout the course of treatment. |
| Attempt 2  The antituberculosis drug that is an indication for visual monitoring is A. Ethambutol hydrochloride.  Ethambutol is known to have potential ocular toxicity, which can lead to vision-related issues, such as optic neuritis. Therefore, individuals taking ethambutol as part of their tuberculosis treatment should undergo regular visual monitoring to detect any potential visual changes early and adjust the treatment regimen if necessary.  The other antituberculosis drugs listed (B. Isoniazid, C. Moxifloxacin, D. Pyrazinamide, E. Rifampicin) do not have the same level of association with ocular toxicity, although each of these drugs has its own set of potential side effects and monitoring requirements. |
| Attempt 3  The antituberculosis drug that requires visual monitoring is:  A. Ethambutol hydrochloride  Ethambutol is known to have the potential to cause optic neuritis, which can lead to visual disturbances, including loss of visual acuity and color blindness. Therefore, it is important to monitor visual acuity in patients receiving ethambutol.  The other antituberculosis drugs listed (isoniazid, moxifloxacin, pyrazinamide, and rifampicin) do not typically require specific visual monitoring. However, it's important to note that each of these drugs may have their own set of side effects and monitoring requirements as part of tuberculosis treatment. Regular follow-up and monitoring of patients on antituberculosis therapy are crucial to ensure adequate treatment response and to detect and manage any adverse effects. |
| **61** | A 21 year old woman presents to her GP with moderately severe acne. She has tried topical retinoids and topical antibiotics without satisfactory response. She has a history of a deep vein thrombosis following a long-haul flight.  Which is the most appropriate treatment?  A. Co-cyprindiol  B. Desogestrel  C. Flucloxacillin  D. Isotretinoin  E. Lymecycline | Attempt 1  Given the patient's history of deep vein thrombosis, the most appropriate treatment option for her moderately severe acne would be:  D. Isotretinoin  Isotretinoin is an oral retinoid medication that is highly effective in treating severe acne that has not responded to other treatments. It is particularly useful for nodular or cystic acne. However, it is associated with a potential risk of blood clot formation, including deep vein thrombosis. Therefore, it is crucial to consider the patient's medical history and carefully evaluate the risks and benefits before prescribing isotretinoin.  Co-cyprindiol (A) is a combined oral contraceptive that can be effective in treating acne in some women, but it may not be suitable for a patient with a history of deep vein thrombosis.  Desogestrel (B) is a progestin-only oral contraceptive that may have a milder effect on acne compared to combined oral contraceptives. It may be an option, but considering the patient's history of deep vein thrombosis, caution is advised.  Flucloxacillin (C) is an antibiotic used to treat bacterial infections, but it is not a first-line treatment for acne.  Lymecycline (E) is a tetracycline antibiotic commonly prescribed for acne, but since the patient has already tried topical antibiotics without satisfactory response, an oral medication like isotretinoin would be a more appropriate next step.  It's important for the patient to discuss these treatment options with her healthcare provider to determine the best course of action considering her individual circumstances and medical history. |
| Attempt 2  Given the patient's history of deep vein thrombosis and the need for effective acne treatment, the most appropriate treatment choice would be D. Isotretinoin.  Isotretinoin is a potent oral retinoid used for the treatment of severe and persistent cases of acne that have not responded to other treatments. It's especially effective for nodulocystic acne and can result in long-term remission or even permanent resolution of acne symptoms.  While co-cyprindiol (option A) and desogestrel (option B) are oral contraceptive options that can help manage acne in some cases, they might not be the best choices for this patient given her history of deep vein thrombosis.  Flucloxacillin (option C) is an antibiotic, and lymecycline (option E) is a tetracycline antibiotic used for the treatment of acne, but given the patient's inadequate response to topical antibiotics and retinoids, a more comprehensive and effective treatment like isotretinoin is recommended.  However, the final decision should be made in consultation with a healthcare professional who can consider the patient's medical history, current condition, and any potential contraindications or side effects of the chosen treatment. |
| Attempt 3  Given the patient's history of deep vein thrombosis and the need for effective acne treatment, the most appropriate treatment option in this case is D. Isotretinoin.  Isotretinoin is a potent oral medication used to treat severe and resistant cases of acne that have not responded to other treatments. However, it is associated with a risk of potential side effects, including teratogenicity (causing birth defects) and potential impacts on liver function and lipid levels. Close monitoring is usually required during isotretinoin treatment, and strict contraception methods must be employed due to its teratogenic effects.  Options A (Co-cyprindiol) and B (Desogestrel) are hormonal treatments that can be effective for managing acne in certain cases. However, given the patient's history of deep vein thrombosis, hormonal treatments might carry an increased risk of thrombotic events.  Option C (Flucloxacillin) is an antibiotic and is not typically used as a first-line treatment for moderate to severe acne. Antibiotics are usually reserved for cases where other treatments have failed or in combination with other therapies.  Option E (Lymecycline) is an oral antibiotic commonly used to treat acne. While it may be effective in some cases, the patient's lack of satisfactory response to topical antibiotics suggests that a different approach may be needed.  Considering the patient's history and the severity of her acne, isotretinoin would likely be the most suitable option after a thorough discussion of its potential benefits, risks, and side effects with the patient. It's important for her to work closely with her healthcare provider to make an informed decision about her treatment. |
| **62** | A 45 year old man has had weight loss, fatigue and polyuria for 3 months. He takes a number of multivitamin preparations. Clinical examination is unremarkable. Investigations: Serum corrected calcium 2.9 mmol/L (2.2–2.6) Phosphate 0.82 mmol/L (0.8–1.5) Serum alkaline phosphatase 154 IU/L (25–115) Parathyroid hormone 7.9 pmol/L (1.6–8.5) Serum electrolytes and urea are normal.  Which is the most likely diagnosis?  A. Bony metastases  B. Excess calcium intake  C. Primary hyperparathyroidism  D. Sarcoidosis  E. Vitamin D excess | Attempt 1  Based on the provided information, the most likely diagnosis in this case is:  C. Primary hyperparathyroidism  Primary hyperparathyroidism is characterized by excessive production of parathyroid hormone (PTH) by the parathyroid glands, leading to increased levels of calcium in the blood (hypercalcemia). The high serum corrected calcium level, along with the elevated alkaline phosphatase and normal phosphate levels, are consistent with primary hyperparathyroidism.  Excess calcium intake (B) is less likely because it would typically result in elevated serum calcium levels but not an increase in alkaline phosphatase. Additionally, excess calcium intake is unlikely to cause long-term weight loss, fatigue, and polyuria.  Bony metastases (A) typically occur in the context of cancer and are not supported by the given clinical findings.  Sarcoidosis (D) can cause hypercalcemia, but it is usually associated with increased serum levels of angiotensin-converting enzyme (ACE) and abnormalities in chest X-rays or CT scans, which are not mentioned in the case.  Vitamin D excess (E) can lead to hypercalcemia, but the PTH level in this case is within the normal range, making primary hyperparathyroidism a more likely diagnosis.  It's important for the patient to follow up with a healthcare provider for further evaluation, including imaging studies and possible referral to an endocrinologist for confirmation and management of primary hyperparathyroidism. |
| Attempt 2  Based on the provided information and the laboratory values, the most likely diagnosis is C. Primary hyperparathyroidism.  Primary hyperparathyroidism is characterized by elevated levels of parathyroid hormone (PTH) and serum calcium. In this case, the patient has elevated serum calcium (2.9 mmol/L) and slightly elevated PTH (7.9 pmol/L), along with low phosphate levels. These findings are indicative of an excessive release of calcium from the bones and decreased reabsorption of phosphate from the kidneys, which are typical in primary hyperparathyroidism.  The other options (A. Bony metastases, B. Excess calcium intake, D. Sarcoidosis, E. Vitamin D excess) may also lead to hypercalcemia, but the specific combination of laboratory values and the clinical context point more strongly toward primary hyperparathyroidism.  It's important for the patient to undergo further evaluation and consultation with a healthcare professional to confirm the diagnosis and determine the appropriate management plan. |
| Attempt 3  Based on the given clinical information and investigation results, the most likely diagnosis in this case is:  C. Primary hyperparathyroidism  Primary hyperparathyroidism is characterized by excessive production of parathyroid hormone (PTH) by the parathyroid glands, leading to increased levels of serum calcium (hypercalcemia). The elevated serum corrected calcium level in this patient (2.9 mmol/L) is above the normal range.  Other findings associated with primary hyperparathyroidism include normal or low phosphate levels (as seen in this case), increased alkaline phosphatase levels (indicating bone turnover), and often normal serum electrolytes and urea.  The symptoms of weight loss, fatigue, and polyuria can be attributed to the effects of hypercalcemia on various organ systems. Polyuria is commonly seen due to the diuretic effect of hypercalcemia on the kidneys.  Excess calcium intake and vitamin D excess are less likely in this case since the patient's symptoms are prolonged and not related to recent changes in supplementation. Bony metastases may cause hypercalcemia, but the absence of other signs of malignancy makes it less likely. Sarcoidosis can also cause hypercalcemia, but it typically presents with other systemic manifestations.  Further evaluation, including imaging (e.g., neck ultrasound) and referral to an endocrinologist, may be necessary to confirm the diagnosis and determine the underlying cause of primary hyperparathyroidism. |
| **63** | A 59 year old man has a 1 year history of erectile dysfunction. He has a history of angina, type 2 diabetes mellitus and peripheral vascular disease. He had a thyroidectomy 2 years ago for thyrotoxicosis. His regular medications are aspirin, diltiazem, levothyroxine, metformin, ramipril and simvastatin. His BP is 140/90 mmHg lying and 135/85 mmHg standing. His foot pulses are not palpable. He has normal sensation in his feet.  Which is most likely to be the main cause of his erectile dysfunction?  A. Adverse effect of medication  B. Autonomic neuropathy  C. Hypothyroidism  D. Testosterone deficiency  E. Vascular insufficiency | Attempt 1  In this case, the most likely cause of the patient's erectile dysfunction is:  E. Vascular insufficiency  The patient's medical history, which includes peripheral vascular disease and diabetes mellitus, suggests a potential impairment of blood flow to the penis. Both conditions can lead to damage and narrowing of blood vessels, reducing the ability to achieve and maintain an erection.  While medications can contribute to erectile dysfunction, the patient's medication list does not include any known culprits for this side effect. Autonomic neuropathy (B) can also contribute to erectile dysfunction in individuals with diabetes, but the absence of sensory impairment in the patient's feet suggests that autonomic neuropathy may not be the primary cause in this case.  Hypothyroidism (C) can cause various symptoms, including sexual dysfunction, but the patient has been on levothyroxine replacement therapy, which should correct any hormonal imbalances.  Testosterone deficiency (D) could potentially contribute to erectile dysfunction, but it is less likely to be the main cause in this case compared to vascular insufficiency.  Given the patient's medical history, peripheral vascular disease, and lack of palpable foot pulses, vascular insufficiency emerges as the most likely cause of his erectile dysfunction. It is important for him to discuss this concern with his healthcare provider to determine the most appropriate management and treatment options. |
| Attempt 2  Given the patient's history of peripheral vascular disease and lack of palpable foot pulses, the most likely cause of his erectile dysfunction is E. Vascular insufficiency.  Peripheral vascular disease can lead to reduced blood flow to the lower extremities and other parts of the body, including the genital area. Reduced blood flow can affect the ability to achieve and maintain an erection, contributing to erectile dysfunction.  While other factors like medication side effects, autonomic neuropathy, hypothyroidism, and testosterone deficiency can also play a role in erectile dysfunction, the patient's vascular issues are particularly relevant in this case.  It's important for the patient to discuss his concerns with a healthcare professional, as they can provide a comprehensive evaluation and guidance on appropriate management options. |
| Attempt 3  In this case, the most likely main cause of the patient's erectile dysfunction is:  E. Vascular insufficiency  The patient's medical history, which includes peripheral vascular disease and the absence of palpable foot pulses, suggests the presence of vascular pathology. Erectile dysfunction is commonly associated with underlying vascular insufficiency, particularly in patients with a history of peripheral vascular disease or cardiovascular risk factors.  The patient's risk factors, such as angina, type 2 diabetes mellitus, and peripheral vascular disease, contribute to endothelial dysfunction and impaired blood flow to the penile arteries. This vascular insufficiency can lead to inadequate blood flow and subsequent difficulty in achieving or maintaining an erection.  While medication side effects (A) can contribute to erectile dysfunction, in this case, the patient's medication regimen does not include any known common causes of erectile dysfunction. Autonomic neuropathy (B) can also contribute to erectile dysfunction, but the patient's normal sensation in his feet suggests that autonomic neuropathy may not be the primary cause.  Hypothyroidism (C) can affect sexual function, including erectile dysfunction, but the patient's levothyroxine therapy indicates that his thyroid function is being adequately replaced. Testosterone deficiency (D) could potentially contribute to erectile dysfunction, but it is less likely to be the main cause in this case, given the presence of known vascular risk factors and the absence of other symptoms suggestive of low testosterone levels.  Therefore, vascular insufficiency is the most likely main cause of the patient's erectile dysfunction, considering his medical history, risk factors, and physical examination findings. Further evaluation and management aimed at improving vascular health, such as optimizing cardiovascular risk factors and considering targeted therapies, may be appropriate. Referral to a specialist, such as a urologist, may also be warranted for a comprehensive assessment and management of erectile dysfunction. |
| **64** | A 52 year old man has had 3 months of fatigue. He has a history of ulcerative colitis and takes mesalazine. He drinks 20 units of alcohol per week. His temperature is 36.8°C and pulse rate 80 bpm. He has 3 cm hepatomegaly. Investigations: Albumin 36 g/L (35–50) ALT 65 IU/L (10–50) ALP 580 IU/L (25–115) Bilirubin 18 μmol/L (<17) γGT 230 IU/L (9–40)  Which is the most likely diagnosis?  A. Alcoholic hepatitis  B. Cholangiocarcinoma  C. Choledocholithiasis  D. Hepatocellular carcinoma  E. Primary sclerosing cholangitis | Attempt 1  Based on the provided information and laboratory results, the most likely diagnosis in this case is:  A. Alcoholic hepatitis  The patient's history of ulcerative colitis, alcohol consumption (20 units per week), and hepatomegaly are suggestive of alcoholic hepatitis. The elevated liver enzymes, including ALT, ALP, and γGT, further support this diagnosis. Alcoholic hepatitis is characterized by inflammation and liver damage caused by excessive alcohol consumption.  Cholangiocarcinoma (B) and primary sclerosing cholangitis (E) typically present with different clinical features and laboratory findings. Choledocholithiasis (C), which refers to the presence of stones in the common bile duct, can cause symptoms such as abdominal pain and jaundice but does not typically lead to hepatomegaly and the specific pattern of liver enzyme elevation seen in this case.  Hepatocellular carcinoma (D) may be considered in patients with chronic liver disease, such as cirrhosis, but the presence of hepatomegaly and the pattern of liver enzyme elevation are more consistent with alcoholic hepatitis in this case.  It is important for the patient to receive appropriate medical management and guidance regarding alcohol consumption to prevent further liver damage and complications. |
| Attempt 2  Based on the provided information and the laboratory values, the most likely diagnosis is A. Alcoholic hepatitis.  The patient's history of alcohol consumption (20 units per week), hepatomegaly, elevated liver enzymes (ALT, ALP, γGT), and bilirubin within slightly elevated range are indicative of alcoholic hepatitis. Alcoholic hepatitis is a serious inflammation of the liver that can occur due to excessive alcohol consumption.  While other conditions like cholangiocarcinoma, choledocholithiasis, hepatocellular carcinoma, and primary sclerosing cholangitis can also present with elevated liver enzymes and hepatomegaly, the patient's history of alcohol consumption is a significant factor pointing towards alcoholic hepatitis as the primary cause.  It's important for the patient to seek medical attention for proper evaluation, diagnosis, and management. Reducing or stopping alcohol consumption is a crucial step in managing alcoholic hepatitis. |
| Attempt 3  The most likely diagnosis in this case is:  A. Alcoholic hepatitis  The patient's history of alcohol consumption, elevated liver enzymes (ALT, ALP, γGT), hepatomegaly, and fatigue are consistent with alcoholic hepatitis. Alcoholic hepatitis is an inflammation of the liver caused by excessive alcohol consumption. It typically presents with hepatomegaly, jaundice, and elevated liver enzymes.  The patient's elevated γGT and ALP levels suggest cholestasis, which is commonly seen in alcoholic liver disease. Although not specific, it further supports the diagnosis of alcoholic hepatitis.  Cholangiocarcinoma (B) is a type of bile duct cancer that typically presents with obstructive jaundice and is less likely in this case. Choledocholithiasis (C) refers to the presence of stones in the common bile duct and usually presents with symptoms of biliary obstruction such as jaundice and abdominal pain, which are not prominent in this patient's presentation.  Hepatocellular carcinoma (D) is a primary liver cancer that can be associated with underlying liver disease, such as chronic hepatitis B or C infection or cirrhosis. While chronic alcohol abuse can increase the risk of hepatocellular carcinoma, the clinical presentation and laboratory findings in this case are more suggestive of alcoholic hepatitis.  Primary sclerosing cholangitis (E) is a chronic liver disease characterized by inflammation and fibrosis of the bile ducts. It is commonly associated with ulcerative colitis. However, the clinical findings in this case, such as hepatomegaly, elevated liver enzymes, and the patient's alcohol consumption, are more indicative of alcoholic hepatitis.  It is important to note that further evaluation, including imaging studies and possibly liver biopsy, may be necessary to confirm the diagnosis and assess the severity of liver damage. Additionally, addressing the patient's alcohol consumption is essential for management and preventing further liver damage. Referral to a gastroenterologist or hepatologist is recommended for further evaluation and management. |
| **65** | A 73 year old man has increasing breathlessness over 1 week. He has a history of chronic kidney disease and ischaemic heart disease. He takes alfacalcidol, aspirin, atorvastatin, bisoprolol fumarate, furosemide and irbesartan. There are bibasal inspiratory crepitations and mild peripheral oedema. Investigations: Sodium 134 mmol/L (135–146) Potassium 6.7 mmol/L (3.5–5.3) Urea19 mmol/L (2.5–7.8) Creatinine 259 μmol/L (60–120) eGFR 23 mL/min/1.73 m2 (>60)  Which drug is most likely to be contributing to his hyperkalaemia?  A. Alfacalcidol  B. Aspirin  C. Bisoprolol fumarate  D. Furosemide  E. Irbesartan | Attempt 1  In this case, the drug most likely contributing to the patient's hyperkalemia is:  E. Irbesartan  Irbesartan is an angiotensin II receptor blocker (ARB) used for the treatment of hypertension and to protect kidney function in patients with chronic kidney disease. However, one potential side effect of ARBs is hyperkalemia, which is an elevated potassium level in the blood. Irbesartan works by blocking the effects of angiotensin II, which can lead to decreased aldosterone secretion. Aldosterone promotes potassium excretion in the kidneys, so decreased aldosterone levels can result in potassium retention and hyperkalemia.  The patient's elevated potassium level (6.7 mmol/L) is above the normal range (3.5-5.3 mmol/L) and suggests impaired potassium regulation. Given the patient's history of chronic kidney disease and the use of irbesartan, it is likely that the medication is contributing to the hyperkalemia.  It is important to monitor and manage the patient's potassium levels closely and consider adjusting the medication regimen as needed to prevent complications associated with hyperkalemia. |
| Attempt 2  The drug most likely to be contributing to his hyperkalemia is E. Irbesartan.  Irbesartan is an angiotensin II receptor blocker (ARB) commonly used to treat conditions like hypertension and heart failure. However, ARBs can cause an increase in serum potassium levels, especially in patients with pre-existing kidney disease. Since this patient has chronic kidney disease with reduced kidney function (eGFR of 23 mL/min/1.73 m²), the impaired renal function can contribute to decreased potassium excretion, making him more susceptible to hyperkalemia induced by medications like irbesartan.  It's important for the patient to consult his healthcare provider for further evaluation and potential adjustments to his medication regimen, especially considering his hyperkalemia and underlying health conditions. |
| Attempt 3  The drug that is most likely contributing to the hyperkalemia in this patient is:  E. Irbesartan  Irbesartan is an angiotensin II receptor blocker (ARB) commonly used in the management of hypertension and heart failure. One of the side effects of ARBs is hyperkalemia, which is an elevated potassium level in the blood. ARBs inhibit the action of angiotensin II on the renin-angiotensin-aldosterone system (RAAS), leading to reduced aldosterone secretion. Aldosterone promotes potassium excretion in the kidneys, so its inhibition can result in decreased potassium excretion and subsequent hyperkalemia.  In this patient, the presence of hyperkalemia (potassium level of 6.7 mmol/L) along with the use of irbesartan suggests that the medication is contributing to the elevated potassium level. The patient's chronic kidney disease (CKD) can further impair potassium excretion, making him more susceptible to developing hyperkalemia when taking medications that affect potassium levels.  Other medications in the patient's regimen, such as furosemide (D) and alfacalcidol (A), can also have an impact on potassium levels. Furosemide is a loop diuretic that promotes potassium excretion and can lower potassium levels. Alfacalcidol is a vitamin D analog and is not typically associated with hyperkalemia.  Aspirin (B) and bisoprolol fumarate (C) are not known to directly cause hyperkalemia. Aspirin is a nonsteroidal anti-inflammatory drug (NSAID) that does not significantly affect potassium levels. Bisoprolol is a beta-blocker and is not typically associated with potassium imbalances.  It is important to monitor and manage hyperkalemia appropriately, considering the patient's renal function, medications, and overall clinical status. Adjustments to the medication regimen or potassium-lowering interventions may be necessary in consultation with a healthcare professional. |
| **66** | A 65 year old man is invited to the abdominal aortic aneurysm screening programme. An ultrasound scan shows his abdominal aorta to be 33 mm in diameter.  Which is the most appropriate management plan?  A. Reassure and discharge  B. Refer for angiography  C. Refer for vascular surgery  D. Repeat ultrasound scan in 12 months  E. Request CT scan of abdomen | Attempt 1  The most appropriate management plan for a 65-year-old man with an abdominal aortic aneurysm measuring 33 mm in diameter is:  D. Repeat ultrasound scan in 12 months  The size of the abdominal aorta is an important factor in determining the management of an abdominal aortic aneurysm (AAA). The threshold for intervention typically depends on the size of the aneurysm. In this case, the aneurysm is 33 mm in diameter, which falls within the surveillance range.  According to current guidelines, an AAA measuring between 30-54 mm in diameter is usually managed with surveillance and periodic imaging. The recommended follow-up interval is generally every 12 months to monitor any changes in the aneurysm size.  Therefore, the most appropriate management plan would be to repeat the ultrasound scan in 12 months to assess if there is any progression in the size of the aneurysm. This approach allows for close monitoring and timely intervention if the aneurysm size reaches the threshold for surgical repair.  It is important to note that the management of abdominal aortic aneurysms may vary based on individual patient characteristics, comorbidities, and clinical judgment. Consulting with a vascular specialist or following local guidelines is essential for personalized management decisions. |
| Attempt 2  The most appropriate management plan for a 65-year-old man with an abdominal aortic diameter of 33 mm is D. Repeat ultrasound scan in 12 months.  Abdominal aortic aneurysms (AAAs) are typically monitored based on their size. The threshold for intervention varies, but generally, an aneurysm size of 5.5 cm or larger is considered for surgical repair. In this case, with an aortic diameter of 33 mm (3.3 cm), the aneurysm is still below the threshold for intervention.  The recommended management plan for an AAA measuring less than 5.5 cm is to repeat ultrasound scans at regular intervals to monitor its growth. A 12-month interval is a reasonable timeframe for follow-up in this situation.  As the aneurysm grows, the healthcare provider will assess the risk and potential benefits of intervention based on factors such as the patient's age, overall health, and aneurysm characteristics. Regular monitoring is essential to catch any significant increase in size that might warrant further evaluation or intervention. |
| Attempt 3  The most appropriate management plan for a 65-year-old man with an abdominal aortic diameter of 33 mm detected during an abdominal aortic aneurysm (AAA) screening is:  D. Repeat ultrasound scan in 12 months  The threshold for intervention in the management of abdominal aortic aneurysms is typically based on the diameter of the aneurysm. In general, the decision for intervention is guided by the size of the aneurysm and the risk of rupture. The current guidelines recommend surveillance with periodic ultrasound scans for aneurysms between 3.0 and 5.4 cm in diameter.  In this case, the abdominal aortic diameter of 33 mm falls within the range of 3.0 to 5.4 cm. As the diameter is below the threshold for intervention, the most appropriate management plan would be to repeat the ultrasound scan in 12 months. This allows for ongoing surveillance to monitor any potential growth of the aneurysm.  Reassurance and discharge (A) may not be appropriate since the patient has an abdominal aortic aneurysm that requires ongoing monitoring.  Referral for angiography (B) or CT scan of the abdomen (E) is not necessary at this stage, as the aneurysm is below the intervention threshold. These imaging modalities may be reserved for cases where there is a need for further evaluation or if intervention becomes necessary.  Referral for vascular surgery (C) is not warranted at this point since the aneurysm diameter is below the threshold for intervention.  Regular surveillance with ultrasound scans is the recommended approach for monitoring the size and progression of the abdominal aortic aneurysm in this case. |
| **67** | A 28 year old woman has pain on swallowing. She has a history of asthma that is well controlled using metered dose salbutamol and beclometasone dipropionate (800 micrograms/day) inhalers. She has white plaques in her mouth. An anti-fungal oral suspension is prescribed.  What is the most appropriate management with regard to her beclometasone?  A. Change beclometasone dipropionate to a dry powder formulation  B. Change beclometasone dipropionate to fluticasone  C. Change beclometasone dipriopionate to salmeterol  D. Take beclometasone dipropionate using a large volume spacer  E. Take salbutamol and beclometasone dipropionate at least 1 h apart | Attempt 1  The most appropriate management with regard to the patient's beclometasone dipropionate inhaler in the context of her oral fungal infection is:  A. Change beclometasone dipropionate to a dry powder formulation  Oral fungal infections, such as oral thrush (caused by Candida species), can be associated with the use of inhaled corticosteroids like beclometasone dipropionate. The use of a metered dose inhaler (MDI) with a spacer can increase the risk of deposition of the medication in the mouth and throat, leading to local side effects such as oral thrush.  Switching the patient from a metered dose inhaler (MDI) formulation of beclometasone dipropionate to a dry powder inhaler (DPI) can help reduce the risk of local side effects, including oral fungal infections. Dry powder formulations generally have a lower risk of depositing the medication in the oropharynx, minimizing the exposure to the oral mucosa.  Therefore, changing the beclometasone dipropionate to a dry powder formulation would be the most appropriate management strategy in this case. It is important to discuss this change with the patient and provide proper instructions on the use of the new inhaler device.  It's worth noting that the management decisions for individual patients may vary, and it's always recommended to consult with a healthcare professional or the patient's prescribing physician for personalized advice. |
| Attempt 2  Given the patient's symptoms of white plaques in her mouth and the history of using beclometasone dipropionate inhaler, the most appropriate management in this context is A. Change beclometasone dipropionate to a dry powder formulation.  Dry powder inhalers are less likely to contribute to the development of oral thrush (candidiasis) compared to metered-dose inhalers, as they tend to deposit medication deeper into the lungs and have less impact on the oral cavity. This can help reduce the risk of fungal overgrowth in the mouth and subsequent symptoms of pain on swallowing and white plaques.  It's important for the patient to follow up with her healthcare provider for further guidance and to ensure effective asthma management while minimizing the risk of oral candidiasis. |
| Attempt 3  The most appropriate management regarding the use of beclometasone dipropionate inhaler in a 28-year-old woman with pain on swallowing and white plaques in her mouth is:  A. Change beclometasone dipropionate to a dry powder formulation  Beclometasone dipropionate is a corticosteroid inhaler commonly used for asthma control. It is important to minimize the risk of developing oral candidiasis (thrush), which can occur as a side effect of inhaled corticosteroids. In this case, the presence of white plaques in her mouth suggests a possible fungal infection.  Switching to a dry powder formulation of the corticosteroid inhaler, such as dry powder beclometasone dipropionate or an alternative dry powder corticosteroid inhaler, can help reduce the risk of oral candidiasis. Dry powder formulations are less likely to deposit corticosteroids in the oral cavity, reducing the local side effects.  The other options listed are not the most appropriate management choices:  - Changing beclometasone dipropionate to fluticasone (B) or salmeterol (C) would not directly address the risk of oral candidiasis. These are alternative corticosteroid or long-acting beta-agonist inhalers and do not change the drug delivery mechanism.  - Taking beclometasone dipropionate using a large volume spacer (D) may help reduce local side effects but may not fully eliminate the risk of oral candidiasis.  - Taking salbutamol and beclometasone dipropionate at least 1 hour apart (E) is not directly related to the management of oral candidiasis. It is recommended to separate the timing of short-acting beta-agonists and corticosteroids to optimize their effects, but this does not address the risk of fungal infection.  Therefore, changing the beclometasone dipropionate to a dry powder formulation is the most appropriate management strategy to minimize the risk of oral candidiasis while maintaining asthma control. |
| **68** | A 37 year old man has increasing fever and shortness of breath. He was admitted 3 days ago with left lower lobe pneumonia due penicillin-sensitive Streptococcus pneumoniae. He is receiving intravenous benzylpenicillin 1.2 g four times daily. His temperature is 38.5°C, pulse 100 bpm and BP 122/80 mmHg. Investigations: Chest X-ray: left basal effusion. Diagnostic pleural aspiration: Purulent fluid. Microscopy shows numerous polymorphs and Gram-positive cocci  Which is the most appropriate next step in management?  A. Catheter thoracostomy drainage  B. Increase dose of benzylpenicillin  C. Open thoracostomy  D. Switch benzylpenicillin to ceftriaxone  E. Switch benzylpenicillin to vancomycin | Attempt 1  The most appropriate next step in management for this patient with purulent pleural fluid and left basal effusion is:  A. Catheter thoracostomy drainage  The presence of purulent fluid on diagnostic pleural aspiration, along with the chest X-ray findings of a left basal effusion, suggests the development of a parapneumonic effusion. Parapneumonic effusions can occur as a complication of pneumonia, and when the effusion is infected (empyema), prompt intervention is necessary.  The initial management of an empyema involves drainage of the pleural fluid. Catheter thoracostomy drainage, also known as tube thoracostomy, is the recommended first-line intervention. It involves the insertion of a chest tube into the pleural space to drain the infected fluid and facilitate lung re-expansion.  Increasing the dose of benzylpenicillin or switching to an alternative antibiotic alone would not be sufficient to address the empyema. Antibiotics play a role in the treatment of parapneumonic effusions, but drainage is crucial to remove the infected fluid and prevent further complications.  Open thoracostomy is a more invasive surgical procedure that may be considered if the catheter drainage is not effective or in certain cases where there are specific indications. However, it is not the initial step in management.  Therefore, the most appropriate next step in management for this patient is catheter thoracostomy drainage to address the empyema and promote resolution of the infection. |
| Attempt 2  Given the patient's clinical presentation, the presence of purulent fluid in the pleural aspiration, and the possibility of empyema, the most appropriate next step in management is A. Catheter thoracostomy drainage.  Empyema is a collection of pus in the pleural space, and it requires appropriate drainage to effectively treat the infection. Catheter thoracostomy, also known as tube thoracostomy, involves the insertion of a chest tube into the pleural space to drain the accumulated fluid and pus. This drainage helps alleviate symptoms, prevent complications, and allow for better antibiotic penetration to the infection site.  While adjusting antibiotics may also be necessary based on culture and sensitivity results, the priority in this case is to address the pleural collection by draining the empyema. This procedure is usually guided by imaging studies, and it's crucial to involve a medical professional for proper assessment and intervention. |
| Attempt 3  Based on the clinical presentation and investigation findings, the most appropriate next step in management for the 37-year-old man with increasing fever and shortness of breath is:  A. Catheter thoracostomy drainage  The presence of a left basal effusion and purulent fluid on diagnostic pleural aspiration suggests the development of a parapneumonic effusion or empyema, which is a complication of pneumonia. The appropriate management for this patient would be catheter thoracostomy drainage, also known as tube thoracostomy or chest tube insertion. This procedure involves inserting a chest tube into the pleural space to drain the infected fluid and facilitate lung re-expansion.  Increasing the dose of benzylpenicillin (B) alone may not adequately address the need for drainage of the infected fluid. Although antibiotic therapy is essential in treating the underlying infection, the presence of a significant effusion requires drainage for optimal management.  Open thoracostomy (C) is a more invasive surgical procedure that is typically reserved for cases in which tube thoracostomy is unsuccessful or if there are specific indications for open surgical intervention. It is not the initial step in the management of uncomplicated parapneumonic effusion.  Switching benzylpenicillin to ceftriaxone (D) or vancomycin (E) is not the immediate priority in management. Antibiotic therapy with benzylpenicillin, which covers penicillin-sensitive Streptococcus pneumoniae, is already being administered. The primary concern at this stage is drainage of the infected fluid from the pleural space.  Therefore, the most appropriate next step in management for this patient is catheter thoracostomy drainage to address the parapneumonic effusion or empyema. |
| **69** | A 52 year old man has 4 weeks of joint pain, fever and weight loss. He is a non-smoker and has no significant medical history. Examination is unremarkable. Investigations: Calcium 3.12 mmol/L (2.2–2.6) Plasma parathyroid hormone <0.5 pmol/L (0.9–5.4) Chest X-ray shows perihilar lymphadenopathy.  Which is the most likely diagnosis?  A. Granulomatosis with polyangiitis  B. Hodgkin's lymphoma  C. Primary hyperparathyroidism  D. Sarcoidosis  E. Tuberculosis | Attempt 1  Given the clinical presentation of joint pain, fever, weight loss, and the presence of perihilar lymphadenopathy on chest X-ray, the most likely diagnosis in this case is:  D. Sarcoidosis  Sarcoidosis is a systemic inflammatory disease characterized by the formation of non-caseating granulomas in various organs, including the lungs, lymph nodes, and joints. It commonly presents with symptoms such as fever, weight loss, and joint pain.  The laboratory findings in this case are consistent with sarcoidosis. The low plasma parathyroid hormone (PTH) level suggests suppressed PTH production, which can occur in sarcoidosis due to increased production of vitamin D by the granulomas. This, in turn, leads to increased calcium levels, as seen in the elevated serum calcium level.  Perihilar lymphadenopathy on chest X-ray is a classic finding in sarcoidosis, as the disease often involves the mediastinal lymph nodes.  While other conditions such as tuberculosis, Hodgkin's lymphoma, granulomatosis with polyangiitis, and primary hyperparathyroidism can also present with similar symptoms or findings, the combination of joint pain, fever, weight loss, low PTH, and perihilar lymphadenopathy in this case strongly suggests sarcoidosis as the most likely diagnosis. |
| Attempt 2  Given the clinical presentation of joint pain, fever, weight loss, and perihilar lymphadenopathy on chest X-ray, along with low plasma parathyroid hormone (PTH) levels and elevated calcium, the most likely diagnosis in this case is D. Sarcoidosis.  Sarcoidosis is a multisystem disorder characterized by the formation of non-caseating granulomas in various organs, including the lungs, lymph nodes, skin, and joints. The perihilar lymphadenopathy seen on the chest X-ray is a characteristic finding in sarcoidosis. Additionally, the elevated calcium levels and low PTH levels are consistent with the development of hypercalcemia, which can occur in sarcoidosis due to increased production of activated vitamin D by macrophages in the granulomas.  The other conditions listed are possibilities to consider, but given the combination of clinical findings, sarcoidosis is the most likely explanation. Further evaluation and consultation with a healthcare professional are important for accurate diagnosis and management. |
| Attempt 3  The most likely diagnosis for the 52-year-old man with 4 weeks of joint pain, fever, weight loss, and perihilar lymphadenopathy on chest X-ray is:  D. Sarcoidosis  Sarcoidosis is a systemic granulomatous disorder characterized by the formation of non-caseating granulomas in various organs, particularly the lungs and lymph nodes. The clinical presentation often includes constitutional symptoms such as fever and weight loss, as well as joint pain. Perihilar lymphadenopathy is a typical finding on chest X-ray in sarcoidosis.  The low calcium level (hypocalcemia) and suppressed plasma parathyroid hormone (PTH) level are consistent with sarcoidosis-associated hypercalcemia, which can occur due to increased production of 1,25-dihydroxyvitamin D by activated macrophages within the granulomas. This leads to enhanced intestinal calcium absorption and subsequent hypoparathyroidism.  Granulomatosis with polyangiitis (A) typically presents with respiratory symptoms such as cough, sinusitis, and hemoptysis, along with renal involvement and systemic vasculitis. The absence of respiratory and renal symptoms makes this diagnosis less likely.  Hodgkin's lymphoma (B) may present with constitutional symptoms, lymphadenopathy, and occasionally with systemic symptoms such as fever and weight loss. However, the absence of other characteristic features such as Reed-Sternberg cells in lymph node biopsy or B symptoms (night sweats, pruritus) makes this diagnosis less likely.  Primary hyperparathyroidism (C) is characterized by hypercalcemia and elevated PTH levels. The findings in this patient, however, indicate hypocalcemia and suppressed PTH, which are not consistent with primary hyperparathyroidism.  Tuberculosis (E) can cause constitutional symptoms, lymphadenopathy, and weight loss. However, the perihilar lymphadenopathy seen on chest X-ray in this case is more suggestive of sarcoidosis. Additionally, tuberculosis typically presents with respiratory symptoms such as cough and may show evidence of pulmonary involvement on imaging.  Therefore, based on the clinical presentation, laboratory findings, and imaging results, the most likely diagnosis is sarcoidosis. Further evaluation and confirmation can be pursued with additional tests, such as biopsy of an affected organ or imaging studies targeting specific areas of involvement. |
| **70** | A 56 year old man has had a single episode of painless visible haematuria. He has no other urinary symptoms and is otherwise fit and well. He has smoked ten cigarettes per day for the past 35 years. He has a BP of 140/85 mmHg. Urinalysis performed after this episode shows blood 2+, no protein and no nitrites. Investigations: Urea 6.5 mmol/L (2.5–7.8) Creatinine 95 μmol/L (60–120) Urine culture: no growth  Which investigation is most likely to confirm the diagnosis?  A. Flexible cystoscopy  B. Serum prostate specific antigen  C. Transrectal ultrasound scan of prostate  D. Ultrasound scan of kidneys  E. Urine cytology | Attempt 1  Given the presentation of painless visible haematuria in a 56-year-old man with a history of smoking, the most appropriate investigation to confirm the diagnosis in this case would be:  A. Flexible cystoscopy  Painless visible haematuria in an adult, especially in the presence of risk factors such as smoking, warrants further investigation to rule out underlying urological malignancy, particularly bladder cancer. Flexible cystoscopy is the gold standard for evaluating the lower urinary tract, including the bladder. It allows direct visualization of the bladder lining and the identification of any abnormal lesions or tumors.  While other investigations such as serum prostate-specific antigen (PSA) and transrectal ultrasound scan of the prostate may be relevant for evaluating prostate-related conditions, they are not the primary investigations of choice in this scenario of painless visible haematuria.  Ultrasound scan of the kidneys is more useful for evaluating renal pathology rather than specifically diagnosing the cause of haematuria.  Urine cytology is a valuable test to detect abnormal cells in the urine, but it has limited sensitivity, especially for early-stage bladder cancer, and may not be the initial investigation of choice.  Therefore, given the clinical scenario, the most appropriate investigation to confirm the diagnosis would be a flexible cystoscopy. |
| Attempt 2  Given the patient's risk factors (smoking) and the presence of painless visible haematuria, the most appropriate investigation to confirm the diagnosis would be A. Flexible cystoscopy.  Painless visible haematuria in a smoker raises concern for urinary tract malignancies, such as bladder cancer. Flexible cystoscopy allows direct visualization of the bladder lining, which can help identify any abnormalities, lesions, or tumors. It is considered a gold standard for evaluating the cause of haematuria, especially in individuals with risk factors like smoking.  However, it's important to consult with a healthcare professional for proper evaluation and management, as individual cases may vary. |
| Attempt 3  In a 56-year-old man with a single episode of painless visible hematuria, the most appropriate investigation to confirm the diagnosis would be:  A. Flexible cystoscopy  Painless visible hematuria in an adult, especially in the presence of risk factors such as smoking, requires further evaluation to rule out underlying urinary tract malignancy. Flexible cystoscopy is the most appropriate and widely recommended investigation for evaluating hematuria. It allows direct visualization of the urethra, bladder, and ureteric orifices, providing a detailed examination of the lower urinary tract.  Serum prostate-specific antigen (PSA) (B) is a blood test primarily used for the detection of prostate cancer. However, in this case, the presentation is suggestive of urinary tract pathology rather than prostate-specific issues.  Transrectal ultrasound scan of the prostate (C) is not the first-line investigation for evaluating hematuria. It is primarily used in the assessment of prostate-related conditions such as prostate enlargement or cancer.  Ultrasound scan of the kidneys (D) is helpful for evaluating the kidneys, but it is not the primary investigation for determining the cause of hematuria. It may be performed as part of a comprehensive evaluation but is not specific for confirming the diagnosis.  Urine cytology (E) is a diagnostic test that examines the cells in the urine for any abnormal changes or cancerous cells. While it can be useful in detecting certain types of urinary tract malignancies, it is not the initial investigation of choice for evaluating hematuria. Flexible cystoscopy provides a direct visualization of the bladder and urethra, allowing for a more accurate assessment.  Therefore, in the context of painless visible hematuria, the most appropriate investigation to confirm the diagnosis is flexible cystoscopy. |
| **71** | The daughter of a 78 year old man is concerned about an area of redness on her father's back. He lives alone and spends most of his day sitting in a chair. There is a reddened area over the sacrum, but his skin is intact. He is considered to be at risk of pressure ulcers.  Which member of the community multidisciplinary team would be most suited to conduct an initial assessment?  A. Dietician  B. District nurse  C. Occupational therapist  D. Physiotherapist  E. Tissue viability nurse | Attempt 1  In this scenario, the most suitable member of the community multidisciplinary team to conduct an initial assessment would be:  E. Tissue viability nurse  A tissue viability nurse specializes in the prevention, assessment, and management of wounds, including pressure ulcers. They are trained to evaluate the risk factors for pressure ulcers and assess the integrity of the skin. Given the concerns about the redness on the patient's back and the fact that he is at risk of pressure ulcers due to prolonged sitting, a tissue viability nurse would be the most appropriate professional to conduct an initial assessment.  While other members of the community multidisciplinary team, such as a dietician, district nurse, occupational therapist, or physiotherapist, may be involved in the overall care and management of the patient, a tissue viability nurse has specific expertise in assessing and managing pressure ulcers, making them the most suited for the initial assessment in this case. |
| Attempt 2  E. Tissue viability nurse  A tissue viability nurse specializes in assessing, preventing, and managing wounds, including pressure ulcers. Given the concern about a reddened area over the sacrum and the patient's risk of pressure ulcers due to prolonged sitting, a tissue viability nurse would be the most appropriate member of the community multidisciplinary team to conduct an initial assessment. They have expertise in evaluating skin integrity, recommending preventive measures, and providing guidance on wound management to prevent further complications. |
| Attempt 3  In this scenario, the most appropriate member of the community multidisciplinary team to conduct an initial assessment of the redness on the man's back and his risk of pressure ulcers would be:  E. Tissue viability nurse  A tissue viability nurse is a healthcare professional who specializes in assessing, preventing, and managing wounds, including pressure ulcers. They have expertise in wound care and are skilled in assessing the risk factors for developing pressure ulcers. They can evaluate the redness on the man's back, assess the condition of the skin, and determine the risk level for pressure ulcers. They can also provide guidance on appropriate preventive measures and recommend interventions to minimize the risk of pressure ulcers.  While other members of the community multidisciplinary team, such as a dietician (A), district nurse (B), occupational therapist (C), or physiotherapist (D), may have important roles in the overall care of the patient, the tissue viability nurse is specifically trained in assessing and managing wounds, including pressure ulcers, making them the most suitable choice for the initial assessment in this case. |
| **72** | A junior doctor sustains a needle-stick injury while inserting a venous cannula into a 28 year old man. The patient has a history of intravenous drug use.  Which is the most important first action?  A. Encourage bleeding from the wound  B. Make an appointment with occupational health  C. Seek post-exposure prophylaxis  D. Test the patient for HIV  E. Wash the wound with alcohol | Attempt 1  The most important first action in the case of a needle-stick injury is to prioritize personal safety and take immediate steps to minimize the risk of infection. In this scenario, the healthcare worker has sustained a needle-stick injury while inserting a venous cannula into a patient with a history of intravenous drug use.  The correct answer is:  C. Seek post-exposure prophylaxis  Post-exposure prophylaxis (PEP) involves taking specific medications after an exposure to a potentially infectious source, such as a needle-stick injury. PEP is aimed at reducing the risk of transmission of bloodborne pathogens, including HIV and hepatitis B and C. It is crucial to initiate PEP as soon as possible, preferably within hours of the exposure, to maximize its effectiveness.  While it is important to address the wound and ensure appropriate wound care, seeking post-exposure prophylaxis takes precedence in order to minimize the risk of potential infection. Following the initial steps to ensure personal safety, the healthcare worker should promptly seek medical advice and consult with occupational health or designated personnel responsible for managing needle-stick injuries in their healthcare setting. This will enable them to undergo an assessment, receive appropriate counseling, and initiate the necessary measures, including post-exposure prophylaxis, as deemed necessary based on the specific circumstances of the exposure.  Testing the patient for HIV and other bloodborne pathogens is important, but it should be performed as part of the follow-up and management process rather than being the immediate first action. |
| Attempt 2  C. Seek post-exposure prophylaxis  In the case of a needle-stick injury involving a patient with a history of intravenous drug use, the most important first action is to seek post-exposure prophylaxis (PEP) to prevent potential transmission of bloodborne infections such as HIV and hepatitis B and C. PEP should ideally be initiated as soon as possible after the exposure, as the timing of initiation can impact its effectiveness. After seeking PEP, further steps such as testing the patient for HIV and following up with occupational health can also be important, but prompt initiation of PEP is a critical priority. |
| Attempt 3  The most important first action after a needle-stick injury is:  C. Seek post-exposure prophylaxis.  When a healthcare worker sustains a needle-stick injury, it is crucial to promptly seek post-exposure prophylaxis (PEP) to minimize the risk of transmission of bloodborne infections. This is especially important in cases involving patients with a history of intravenous drug use, as they may have an increased risk of bloodborne infections such as HIV and hepatitis B or C.  Seeking PEP involves contacting the appropriate healthcare personnel, such as occupational health or infection control, to initiate the necessary steps for evaluating the risk, assessing the need for prophylactic treatment, and providing appropriate guidance and follow-up. PEP typically involves a combination of antiretroviral medications for HIV prevention, and in some cases, hepatitis B vaccination or immunoglobulin administration.  While other actions, such as encouraging bleeding from the wound (A), making an appointment with occupational health (B), testing the patient for HIV (D), or washing the wound with alcohol (E), may be relevant steps in the overall management, seeking post-exposure prophylaxis is the most critical initial action to minimize the risk of potential bloodborne infection transmission. |
| **73** | A 32 year old woman has 3 weeks of fever, rigors and lethargy. In the past week, she has also become breathless on exertion. She is an intravenous drug user. Her temperature is 38°C, pulse rate 100 bpm regular, and BP 100/60 mmHg. Her JVP is raised with predominant V waves. There is a pansystolic murmur at the left sternal edge on inspiration. She has reduced air entry with dullness to percussion at the right lung base. She has swelling of both ankles.  Which is the most likely pathogen?  A. Enterococcus faecalis  B. Staphylococcus aureus  C. Staphylococcus epidermidis  D. Streptococcus bovis / streptococcus equinus complex  E. Streptococcus viridans | Attempt 1  Given the clinical presentation of fever, rigors, lethargy, intravenous drug use, breathlessness on exertion, raised JVP with predominant V waves, pansystolic murmur at the left sternal edge on inspiration, reduced air entry with dullness to percussion at the right lung base, and ankle swelling, the most likely pathogen in this case is:  B. Staphylococcus aureus  Staphylococcus aureus is a common pathogen associated with infections in intravenous drug users. It can cause a range of infections, including endocarditis (infection of the heart valves), which would explain the presence of the pansystolic murmur at the left sternal edge. Additionally, Staphylococcus aureus can lead to septic emboli, which can cause pulmonary infiltrates and lead to reduced air entry with dullness to percussion at the lung base. The presence of ankle swelling suggests the possibility of congestive heart failure, which can be a complication of infective endocarditis.  While other bacteria, such as Streptococcus species, can also cause infective endocarditis, the presentation in this case is more consistent with Staphylococcus aureus. Enterococcus faecalis, Staphylococcus epidermidis, and Streptococcus viridans are less commonly associated with infections in intravenous drug users compared to Staphylococcus aureus. Streptococcus bovis and Streptococcus equinus complex are more commonly associated with endocarditis in patients with underlying gastrointestinal pathology, such as colorectal cancer, and are less likely in this case.  It is important to note that this is a simulated scenario, and a definitive diagnosis would require appropriate clinical evaluation, laboratory investigations, and possibly blood cultures to identify the causative pathogen. |
| Attempt 2  B. Staphylococcus aureus  Given the patient's history of intravenous drug use, fever, rigors, breathlessness, and signs of right-sided heart failure (raised JVP with predominant V waves, ankle swelling), the most likely pathogen causing infective endocarditis in this case is Staphylococcus aureus. Intravenous drug use is a risk factor for right-sided infective endocarditis, and Staphylococcus aureus is a common causative organism in these cases. The presence of a pansystolic murmur at the left sternal edge on inspiration (Tricuspid regurgitation murmur) further supports the suspicion of right-sided endocarditis. |
| Attempt 3  The most likely pathogen in this scenario is:  B. Staphylococcus aureus.  The patient's history of intravenous drug use, fever, rigors, lethargy, breathlessness on exertion, raised JVP with predominant V waves, and pansystolic murmur at the left sternal edge on inspiration suggests infective endocarditis, a serious infection of the heart valves. In intravenous drug users, Staphylococcus aureus is the most common pathogen associated with infective endocarditis.  Staphylococcus aureus is a Gram-positive bacterium that can cause a wide range of infections. In intravenous drug users, it is frequently associated with endocarditis due to the direct inoculation of bacteria into the bloodstream through contaminated needles. Staphylococcus aureus endocarditis can lead to systemic symptoms, cardiac complications, and septic emboli to various organs.  While other organisms like Enterococcus faecalis (A), Staphylococcus epidermidis (C), Streptococcus bovis / streptococcus equinus complex (D), and Streptococcus viridans (E) can also cause infective endocarditis, Staphylococcus aureus is the most likely pathogen in this case, given the patient's history of intravenous drug use and the clinical findings described. |
| **74** | A 34 year old woman has sudden onset of right arm weakness and inability to speak. She has a history of migraine and generalised joint pains. Four years ago, she had a deep vein thrombosis in her right leg. Her pulse rate is 68 bpm and BP 178/94 mmHg. She has an expressive dysphasia. She has flaccid weakness of her right arm and facial droop on the right lower half of her face. Investigations: Haemoglobin 118 g/L (115–150) White cell count 4.3 × 109/L (3.8–10.0) Neutrophils 2.1 × 109/L (2.0–7.5) Lymphocytes 0.6 × 109/L (1.1–3.3) Platelets 132 × 109/L (150–400) Total cholesterol 4.6 mmol/L (<5.0) CT scan of head left frontoparietal infarct  Which additional investigation is most likely to reveal the underlying cause of her stroke?  A. Anti-dsDNA antibody  B. Anticardiolipin antibody  C. Anti-Ro antibody  D. Rheumatoid factor  E. Serum immunoglobulins | Attempt 1  Given the clinical presentation of sudden onset of right arm weakness, inability to speak (expressive dysphasia), history of migraine and generalised joint pains, deep vein thrombosis in the past, and the findings on investigations including the left frontoparietal infarct on CT scan, the most likely underlying cause of her stroke is:  B. Anticardiolipin antibody  Anticardiolipin antibodies are associated with an increased risk of thrombotic events, including stroke. In the context of her history of deep vein thrombosis, the presence of anticardiolipin antibodies becomes more significant. Anticardiolipin antibodies are a type of antiphospholipid antibody, and the presence of these antibodies is associated with antiphospholipid syndrome (APS). APS is an autoimmune disorder characterized by recurrent arterial or venous thrombosis and/or pregnancy complications. The presence of a frontoparietal infarct in this patient is consistent with an arterial thrombotic event.  While the other antibodies listed (anti-dsDNA, anti-Ro, rheumatoid factor) are associated with autoimmune diseases, they are not specifically associated with an increased risk of thrombotic events or stroke. Serum immunoglobulins are non-specific and unlikely to reveal the underlying cause in this case.  It's important to note that this is a simulated scenario, and further investigations and evaluation, including repeat testing for anticardiolipin antibodies and other diagnostic tests, would be necessary to confirm the diagnosis of antiphospholipid syndrome and determine the underlying cause of the stroke. |
| Attempt 2  B. Anticardiolipin antibody  Given the patient's history of deep vein thrombosis, migraine, joint pains, and the presence of a left frontoparietal infarct on CT scan, there is a suspicion of an underlying hypercoagulable state. Antiphospholipid syndrome (APS), characterized by the presence of antiphospholipid antibodies such as anticardiolipin antibodies and lupus anticoagulant, is associated with an increased risk of both arterial and venous thrombosis. This condition can present with various clinical manifestations, including stroke. Performing the anticardiolipin antibody test can help identify if APS is contributing to the patient's thrombotic events. |
| Attempt 3  The most appropriate additional investigation to reveal the underlying cause of her stroke in this case is:  B. Anticardiolipin antibody.  The patient's clinical presentation of sudden-onset right arm weakness, inability to speak (expressive dysphasia), facial droop, and history of deep vein thrombosis suggests an ischemic stroke, likely due to an embolism. Given her medical history of migraine, joint pains, and previous deep vein thrombosis, there is suspicion of an underlying hypercoagulable state.  Anticardiolipin antibodies are commonly associated with antiphospholipid syndrome (APS), an autoimmune disorder characterized by the presence of antiphospholipid antibodies and a predisposition to thrombotic events. These antibodies, including anticardiolipin antibodies, can cause an increased risk of arterial and venous thrombosis.  Testing for anticardiolipin antibodies is recommended in patients with unexplained arterial or venous thrombosis, particularly in the presence of other suggestive clinical features. In this case, the patient's history of deep vein thrombosis and the occurrence of an ischemic stroke warrant investigation for antiphospholipid antibodies, specifically anticardiolipin antibodies.  While other autoimmune markers such as anti-dsDNA antibody (A), anti-Ro antibody (C), and rheumatoid factor (D) may be relevant in certain clinical contexts, the most appropriate investigation to explore the underlying cause of her stroke, given the clinical presentation and history, is testing for anticardiolipin antibodies (B). Serum immunoglobulins (E) are less likely to be directly related to the underlying cause of the stroke in this case. |
| **75** | A 55 year old woman has been feeling tired and sleepy. Her partner says that she snores heavily. She has a history of type 2 diabetes mellitus and takes metformin. Her BMI is 38 kg/m2. Her oxygen saturation is 95% breathing air. Her Epworth sleepiness score is 19 (normal <11). Her HbA1cis 60 mmol/mol (20-42).  Which treatment is most likely to improve her daytime somnolence?  A. Bariatric surgery  B. Continuous positive airway pressure ventilation  C. Long acting insulin  D. Mandibular advancement device  E. Modafinil | Attempt 1  Given the patient's symptoms of excessive daytime sleepiness, heavy snoring, and high Epworth sleepiness score, along with a history of obesity and type 2 diabetes mellitus, the most likely underlying cause of her symptoms is obstructive sleep apnea (OSA). OSA is characterized by repetitive episodes of partial or complete upper airway obstruction during sleep, leading to disrupted sleep patterns and daytime somnolence.  The treatment that is most likely to improve her daytime somnolence in this case is:  B. Continuous positive airway pressure (CPAP) ventilation  CPAP is the first-line treatment for moderate to severe OSA. It involves wearing a mask over the nose and/or mouth during sleep, which delivers a continuous flow of pressurized air to keep the upper airway open. By maintaining airway patency, CPAP effectively reduces or eliminates episodes of apnea and hypopnea, improving sleep quality and alleviating daytime sleepiness.  While bariatric surgery may be beneficial for weight loss and could potentially improve sleep apnea symptoms, it is not the initial treatment of choice in this scenario. Long-acting insulin and modafinil do not directly address the underlying issue of upper airway obstruction in OSA. Mandibular advancement devices are an alternative treatment option for patients with mild to moderate OSA who cannot tolerate or are unwilling to use CPAP.  It's important to note that the final treatment decision should be made in consultation with a sleep specialist or healthcare provider experienced in the management of sleep disorders. They will consider the patient's individual circumstances, severity of sleep apnea, and preferences when determining the most appropriate treatment approach. |
| Attempt 2  B. Continuous positive airway pressure ventilation  Given the patient's excessive daytime sleepiness, heavy snoring, obesity, and high Epworth sleepiness score, the most appropriate treatment to improve her daytime somnolence is continuous positive airway pressure (CPAP) ventilation. This is a common treatment for obstructive sleep apnea (OSA), a condition often seen in individuals with obesity and characterized by repeated episodes of partial or complete upper airway collapse during sleep, leading to disrupted sleep and daytime sleepiness. CPAP helps keep the airway open by delivering a constant stream of air pressure, preventing the collapse of the airway and improving sleep quality. |
| Attempt 3  The most appropriate treatment to improve her daytime somnolence in this case is:  B. Continuous positive airway pressure (CPAP) ventilation.  The patient's symptoms, including excessive daytime sleepiness, heavy snoring, and obesity, are suggestive of obstructive sleep apnea (OSA). OSA is a sleep disorder characterized by repetitive episodes of partial or complete upper airway obstruction during sleep, leading to disrupted sleep and daytime somnolence.  Continuous positive airway pressure (CPAP) ventilation is the first-line treatment for moderate to severe OSA. It involves wearing a mask over the nose and/or mouth during sleep, which delivers a steady flow of pressurized air to keep the airway open and prevent obstruction. CPAP improves sleep quality, reduces daytime sleepiness, and alleviates snoring.  While bariatric surgery (A) may be beneficial for weight loss and overall health, its primary purpose is not specifically targeted at treating OSA. Long-acting insulin (C) is used for glycemic control in diabetes and would not directly address the underlying cause of the patient's symptoms. Mandibular advancement devices (D) are an alternative treatment option for mild to moderate OSA but are less effective than CPAP for severe cases. Modafinil (E) is a wakefulness-promoting medication that can temporarily alleviate sleepiness but does not address the underlying airway obstruction.  Therefore, the most appropriate treatment to improve her daytime somnolence and manage her suspected OSA is continuous positive airway pressure (CPAP) ventilation (B). It is important for the patient to undergo a sleep study and consult with a sleep specialist to determine the optimal pressure settings and ensure proper use of the CPAP equipment. |
| **76** | A 72 year old man has had six months of increased frequency of defaecation and three months of dark red rectal bleeding mixed with the stool. Investigations: Haemoglobin 101 g/L (130–175) Mean cell haemoglobin (MCH) 24 pg (27–33) MCV 73 fL (80–96) White cell count 9.1 x 109/L (3.0–10.0) Platelets 354 x 109/L (150–400)  Which is the most likely diagnosis?  A. Colonic carcinoma  B. Diverticular disease  C. Haemorrhoids  D. Ischaemic colitis  E. Ulcerative colitis | Attempt 1  In a 72-year-old man presenting with increased frequency of defecation and dark red rectal bleeding mixed with stool, the most likely diagnosis is:  A. Colonic carcinoma  The combination of symptoms, particularly the persistent rectal bleeding and changes in bowel habits, along with the laboratory findings of anemia (low hemoglobin) and microcytosis (low MCV), raises concern for colonic carcinoma. Colorectal cancer often presents with these symptoms, especially in the older population. Other potential causes such as diverticular disease, hemorrhoids, ischemic colitis, and ulcerative colitis may also cause rectal bleeding, but they are less likely to present with a sustained change in bowel habits.  Further diagnostic evaluation, such as colonoscopy or sigmoidoscopy, is necessary to confirm the diagnosis and assess the extent of the colonic involvement. Tissue biopsy during endoscopy can provide a definitive diagnosis of colonic carcinoma and determine the stage of the disease.  It's important for the patient to be promptly referred to a gastroenterologist or colorectal surgeon for further evaluation and management. Early detection and treatment of colorectal cancer improve outcomes and prognosis. |
| Attempt 2  A. Colonic carcinoma  The combination of increased frequency of defecation, dark red rectal bleeding mixed with stool, and low hemoglobin levels suggests the possibility of colonic carcinoma. The anemia (low hemoglobin) and microcytosis (low MCV) seen in this case could be due to chronic blood loss from the tumor. It's important to consider colorectal cancer as a potential cause of rectal bleeding, especially in older individuals, and further investigations like colonoscopy or imaging may be needed to confirm the diagnosis. |
| Attempt 3  The most likely diagnosis in this case is:  A. Colonic carcinoma.  The patient's symptoms of increased frequency of defecation and dark red rectal bleeding, along with the laboratory findings of low hemoglobin (anemia) and microcytic, hypochromic red blood cells (low MCV and MCH), are concerning for colonic carcinoma. Colorectal cancer often presents with changes in bowel habits, rectal bleeding, and anemia.  While diverticular disease (B) and hemorrhoids (C) can cause rectal bleeding, they are less likely to be associated with increased frequency of defecation and significant anemia. Ischemic colitis (D) typically presents with abdominal pain, bloody diarrhea, and a history of vascular disease, which are not described in this case. Ulcerative colitis (E) is a chronic inflammatory bowel disease that can cause rectal bleeding and increased frequency of bowel movements, but it usually presents at a younger age, and the anemia seen in this case is more suggestive of a neoplastic process.  Given the age of the patient, the presence of rectal bleeding, and the laboratory findings, colonic carcinoma is the most likely diagnosis. Further evaluation with colonoscopy and imaging studies would be necessary to confirm the diagnosis and determine the extent of the disease. |
| **77** | A 24 year old man is reviewed following a recent orchidectomy. The pathologist's report describes a mass with cystic spaces. Histological examination shows areas of mature cartilage and columnar epithelium.  Which is the most likely diagnosis?  A. Chondrosarcoma  B. Hamartoma  C. Lymphoma  D. Seminoma  E. Teratoma | Attempt 1  The most likely diagnosis based on the description of the pathology report is:  E. Teratoma  A teratoma is a type of germ cell tumor that can occur in the testes. It is composed of tissues derived from multiple germ cell layers, including ectoderm, mesoderm, and endoderm. Teratomas can contain a wide range of tissue types, including mature cartilage and epithelial tissues.  In this case, the presence of cystic spaces, mature cartilage, and columnar epithelium is consistent with a teratoma. The histological findings suggest the presence of different tissue types within the tumor, which is characteristic of a teratoma.  It is important to note that further investigation and evaluation may be necessary to determine the exact nature of the teratoma and to guide appropriate management and follow-up. This typically involves imaging studies and additional laboratory tests. A multidisciplinary approach involving urologists, oncologists, and pathologists is often taken to ensure proper diagnosis and management of testicular teratomas. |
| Attempt 2  E. Teratoma  The presence of cystic spaces, mature cartilage, and columnar epithelium in the testicular mass points toward the diagnosis of a teratoma. Teratomas are germ cell tumors that can contain tissues from all three germ layers (ectoderm, mesoderm, and endoderm). The presence of cartilage and other differentiated tissues in the mass supports the diagnosis of a teratoma. |
| Attempt 3  The most likely diagnosis in this case is:  E. Teratoma.  The presence of cystic spaces, mature cartilage, and columnar epithelium in the histological examination suggests a teratoma. Teratomas are germ cell tumors that can contain elements from all three germ cell layers (ectoderm, mesoderm, and endoderm). These tumors can occur in the testes (testicular teratoma) and commonly present as a painless testicular mass.  Chondrosarcoma (A) is a malignant tumor composed of cartilage-forming cells and is less likely given the benign nature of the histological findings in this case.  Hamartoma (B) is a benign tumor-like malformation composed of mature tissues normally found in the affected organ. However, the presence of cartilage and columnar epithelium suggests a germ cell origin rather than a hamartomatous lesion.  Lymphoma (C) typically presents as a solid mass and does not usually contain cartilage or columnar epithelium.  Seminoma (D) is a type of germ cell tumor that typically consists of undifferentiated germ cells with uniform, rounded nuclei. It does not typically contain cartilage or columnar epithelium.  Given the histological findings described, a teratoma is the most likely diagnosis in this case. Further evaluation and staging may be required to determine the extent and potential malignancy of the tumor. |
| **78** | A 50 year old man has had increasing breathlessness when climbing the stairs. There is no chest pain, wheeze or cough. He has COPD. He takes a salbutamol inhaler several times per day. He is an ex-smoker of 3 months and has a 30 pack-year smoking history. His weight is stable and he is otherwise well. Investigation: FEV1 : 75% predicted  Which is the most appropriate next step in pharmacological management?  A. Inhaled beclometasone  B. Inhaled tiotropium and salmeterol  C. Nebulised salbultamol and ipratropium bromide  D. Oral prednisolone  E. Oral theophylline | Attempt 1  The most appropriate next step in pharmacological management for this patient with increasing breathlessness and COPD would be:  B. Inhaled tiotropium and salmeterol  Inhaled tiotropium and salmeterol are long-acting bronchodilators commonly used in the management of COPD. Tiotropium is an anticholinergic medication that helps to relax the airway smooth muscles, while salmeterol is a long-acting beta-agonist that helps to open up the airways. This combination therapy can improve lung function, reduce breathlessness, and enhance exercise tolerance in patients with COPD.  The patient's FEV1 (forced expiratory volume in 1 second) is 75% predicted, indicating moderate airflow limitation. Inhaled bronchodilators, such as tiotropium and salmeterol, are recommended as first-line treatment for patients with moderate to severe COPD. These medications provide sustained bronchodilation and are more effective in managing symptoms compared to short-acting bronchodilators alone.  It's important to note that pharmacological management should be individualized based on the patient's symptoms, lung function, and response to treatment. Regular follow-up with healthcare providers is essential to assess the patient's response to therapy and make any necessary adjustments. |
| Attempt 2  Given the provided information and the patient's clinical situation, the most appropriate next step in pharmacological management for this individual with COPD and increasing breathlessness when climbing stairs is:  B. Inhaled tiotropium and salmeterol  Explanation:  The patient's presentation is consistent with COPD, and his FEV1 of 75% predicted indicates moderate airflow limitation. He is an ex-smoker with a significant smoking history and is currently experiencing exertional breathlessness. Inhaled tiotropium and salmeterol are both bronchodilators that are commonly used as initial maintenance treatment in patients with moderate to severe COPD.  Tiotropium is a long-acting anticholinergic (LAMA) bronchodilator, while salmeterol is a long-acting beta-agonist (LABA) bronchodilator. Combining these two classes of bronchodilators can provide additive bronchodilation, leading to improved lung function and decreased breathlessness. This combination can also help enhance exercise tolerance and quality of life in patients with COPD.  Inhaled corticosteroids (option A) are generally reserved for patients with more severe COPD, particularly if they have frequent exacerbations. Nebulized salbutamol and ipratropium bromide (option C) might be used in acute exacerbations, but they are not the first-line choice for stable maintenance therapy. Oral prednisolone (option D) is not typically used as long-term management for stable COPD. Oral theophylline (option E) is not commonly used as a first-line treatment due to its potential for interactions and side effects.  However, the choice of treatment should be discussed and tailored to the individual patient's needs and preferences in consultation with a healthcare professional. |
| Attempt 3  In this case, the most appropriate next step in pharmacological management for a patient with COPD and increasing breathlessness is:  B. Inhaled tiotropium and salmeterol.  The patient's symptoms of increasing breathlessness suggest inadequate control of his COPD despite the use of a salbutamol inhaler. Inhaled corticosteroids (option A) are typically reserved for patients with frequent exacerbations and a history of asthma-COPD overlap. As the patient does not have symptoms of wheeze or cough, initiating inhaled corticosteroids may not provide additional benefit.  Option C, nebulized salbutamol and ipratropium bromide, may be considered for acute exacerbations or as a rescue therapy, but it is not the most appropriate next step for long-term management of the patient's symptoms.  Option D, oral prednisolone, is generally reserved for exacerbations and not recommended for routine maintenance therapy in stable COPD patients.  Option E, oral theophylline, is not the most appropriate next step as it is a less commonly used medication in the management of COPD, especially in patients who are already using inhaled bronchodilators.  The combination of inhaled tiotropium (a long-acting anticholinergic) and salmeterol (a long-acting beta2-agonist) has been shown to improve lung function, reduce symptoms, and decrease exacerbations in patients with COPD. This combination therapy is often considered as a step-up treatment when short-acting bronchodilators alone are insufficient to control symptoms. Therefore, initiating inhaled tiotropium and salmeterol would be the most appropriate next step in this patient's pharmacological management. |
| **79** | An 86 year old woman has had three falls in the past 3 months. On each occasion, she describes feeling lightheaded and dizzy prior to falling. She is taking alendronic acid, amlodipine, atorvastatin, metformin and zolpidem tartrate. Her BP is 132/80 mmHg sitting and 138/84 mmHg standing.  Which medication is most likely to be contributing to her falls?  A. Alendronic acid  B. Amlodipine  C. Atorvastatin  D. Metformin  E. Zolpidem tartrate | Attempt 1  In the case of an 86-year-old woman who has experienced three falls in the past 3 months, with a complaint of feeling lightheaded and dizzy prior to falling, the medication most likely to be contributing to her falls is:  B. Amlodipine.  Amlodipine is a calcium channel blocker commonly used to treat hypertension. One of the potential side effects of amlodipine is orthostatic hypotension, which is characterized by a drop in blood pressure upon standing. Symptoms of orthostatic hypotension include lightheadedness and dizziness, which can increase the risk of falls, particularly in older individuals.  Alendronic acid (option A) is a bisphosphonate used for the treatment of osteoporosis. While it can cause gastrointestinal side effects, it is less likely to directly contribute to falls.  Atorvastatin (option C) is a statin used to manage cholesterol levels. Falls are not a commonly reported side effect of statins, although muscle-related adverse effects can occur.  Metformin (option D) is an oral medication commonly prescribed for type 2 diabetes. While it can cause gastrointestinal side effects, it is not typically associated with falls.  Zolpidem tartrate (option E) is a sedative-hypnotic used for the short-term treatment of insomnia. While it can cause drowsiness, it is not directly associated with falls unless it leads to impaired coordination or balance.  Considering the patient's symptoms of feeling lightheaded and dizzy prior to falling and the potential for amlodipine to cause orthostatic hypotension, it is the most likely medication contributing to her falls. A medication review and adjustment may be necessary to improve her symptoms and reduce the risk of falls. Consulting with a healthcare professional is recommended for further evaluation and management. |
| Attempt 2  The medication that is most likely to be contributing to the falls in this 86-year-old woman is:  E. Zolpidem tartrate  Explanation:  The patient is experiencing falls associated with feeling lightheaded and dizzy prior to falling. This suggests that her falls may be related to a drop in blood pressure upon standing, which is known as orthostatic hypotension. Orthostatic hypotension can lead to dizziness and lightheadedness, increasing the risk of falls.  Among the medications listed, zolpidem tartrate stands out as a potential contributor to orthostatic hypotension. Zolpidem is a sedative-hypnotic medication commonly used for insomnia. One of its side effects is dizziness, and it can also cause orthostatic hypotension in some individuals, especially older adults. The combination of zolpidem with other medications and factors commonly seen in elderly patients can increase the risk of falls.  While the other medications listed (alendronic acid, amlodipine, atorvastatin, and metformin) have potential side effects, they are less likely to directly cause orthostatic hypotension, which seems to be the primary issue in this patient's case.  It's important for the patient to consult with her healthcare provider to discuss her symptoms, medication regimen, and potential adjustments to her medications to address the falls and minimize the risk of further incidents. |
| Attempt 3  The medication that is most likely to be contributing to the falls in this 86-year-old woman is:  E. Zolpidem tartrate  Zolpidem tartrate is a sedative-hypnotic medication commonly used for the short-term treatment of insomnia. One of the side effects of zolpidem is dizziness, which can increase the risk of falls, especially in the elderly population. The feeling of lightheadedness and dizziness that the woman describes prior to falling may be attributed to the use of zolpidem.  It's important to assess the overall benefit-risk balance of zolpidem in older adults, particularly those who are prone to falls. In many cases, it is advisable to consider alternative non-pharmacological interventions for insomnia or adjust the dosage or timing of medications to minimize the risk of falls. It would be appropriate to consult with a healthcare professional, such as a doctor or pharmacist, to evaluate the necessity and appropriateness of zolpidem in this particular case and discuss potential alternatives or adjustments to the medication regimen. |
| **80** | A 81 year old man has three months of malaise, bleeding gums and pain in his legs. He has been struggling to look after himself since his wife died one year ago. He has a poor diet and reports that he mostly has tea and toast. He has gingival hypertrophy and skin petechiae.  Which micronutrient deficiency is he most likely to have?  A. Magnesium  B. Vitamin A  C. Vitamin B 1  D. Vitamin C  E. Zinc | Attempt 1  The micronutrient deficiency that the 81-year-old man is most likely to have based on his symptoms is:  D. Vitamin C  The presence of bleeding gums, petechiae (small red or purple spots on the skin), and malaise suggests a deficiency of vitamin C, also known as scurvy. Vitamin C is essential for collagen synthesis, which is important for maintaining the integrity of blood vessels, gums, and connective tissues.  The poor diet described by the patient, consisting mostly of tea and toast, is likely lacking in fresh fruits and vegetables, which are the main sources of vitamin C. Inadequate intake of vitamin C over a prolonged period can lead to the development of scurvy.  Treatment for vitamin C deficiency involves increasing dietary intake of vitamin C-rich foods such as citrus fruits, berries, peppers, and leafy greens. In severe cases, oral or intravenous vitamin C supplementation may be required.  It is important for the patient to receive a comprehensive evaluation of his nutritional status and overall health, as well as appropriate support and assistance for his struggles in self-care following the loss of his wife. |
| Attempt 2  Based on the presented symptoms and clinical findings, the 81-year-old man is most likely suffering from:  D. Vitamin C deficiency  Explanation:  The patient is experiencing bleeding gums, skin petechiae (small red or purple spots on the skin caused by bleeding underneath), and leg pain. These symptoms, along with his history of a poor diet and tea and toast intake, are indicative of scurvy, a condition caused by a deficiency of vitamin C (ascorbic acid).  Vitamin C is essential for collagen synthesis, which is important for maintaining the integrity of blood vessels, connective tissues, and skin. Deficiency of vitamin C can lead to weakened blood vessels, resulting in bleeding gums, petechiae, and increased susceptibility to bruising. Leg pain can also be associated with the connective tissue changes that occur due to vitamin C deficiency.  The other listed micronutrients (magnesium, vitamin A, vitamin B1, and zinc) are not typically associated with the specific constellation of symptoms described in this patient. Magnesium deficiency might present with neuromuscular symptoms, vitamin A deficiency with vision problems and skin changes, vitamin B1 deficiency with neurological issues, and zinc deficiency with a variety of symptoms including skin changes and impaired wound healing.  Given the clinical picture, it's important for the patient to receive appropriate medical evaluation and treatment, which would likely involve correcting the vitamin C deficiency through dietary adjustments and supplementation as needed. |
| Attempt 3  Based on the symptoms described, the most likely micronutrient deficiency in this 81-year-old man is:  D. Vitamin C deficiency.  The symptoms of malaise, bleeding gums, and skin petechiae are consistent with the clinical presentation of scurvy, which is caused by a deficiency of vitamin C. Vitamin C plays a crucial role in collagen synthesis, and its deficiency can lead to weakened blood vessels and impaired wound healing, resulting in symptoms such as bleeding gums and skin bruising.  The patient's poor diet, primarily consisting of tea and toast, suggests a lack of fresh fruits and vegetables, which are the primary sources of vitamin C. Additionally, his recent life stressors and struggles with self-care may have contributed to a neglect of adequate nutrition.  Magnesium deficiency (option A) can cause various symptoms, including muscle weakness and cramps, but it is less likely to present with bleeding gums and skin petechiae.  Vitamin A deficiency (option B) can lead to vision problems and dry skin but is not typically associated with gingival hypertrophy or petechiae.  Thiamine (vitamin B1) deficiency (option C) can result in symptoms such as fatigue, weakness, and peripheral neuropathy but is not commonly associated with bleeding gums or skin petechiae.  Zinc deficiency (option E) can cause various symptoms, including skin changes and impaired wound healing, but it is less likely to manifest with gingival hypertrophy and petechiae.  Given the patient's symptoms and the characteristic signs of gingival hypertrophy and skin petechiae, a vitamin C deficiency (scurvy) is the most likely micronutrient deficiency. Proper dietary intervention and vitamin C supplementation would be indicated in the management of this condition. Consulting with a healthcare professional is recommended for further evaluation and treatment. |
| **81** | A 45 year old man has had 6 months of tiredness, reduced libido and erectile dysfunction. Investigations: Testosterone 1.8 nmol/L (9.9–27.8) LH 1.2 U/L (1–8) FSH 1.0 U/L (1–12)  Which is the most likely cause of his presentation?  A. Anabolic steroid misuse  B. Androgen insensitivity syndrome  C. Congenital adrenal hyperplasia  D. Klinefelter's syndrome  E. Pituitary adenoma | Attempt 1  Based on the presented laboratory results and symptoms, the most likely cause of the man's presentation is:  D. Klinefelter's syndrome.  Klinefelter's syndrome is a chromosomal disorder that occurs in males, typically resulting from an extra X chromosome (47,XXY) instead of the usual XY configuration. This syndrome is associated with various clinical manifestations, including decreased testosterone production. The laboratory findings of low testosterone levels (1.8 nmol/L) along with low levels of luteinizing hormone (LH) and follicle-stimulating hormone (FSH) are consistent with the hormonal profile seen in Klinefelter's syndrome.  Anabolic steroid misuse (option A) typically leads to high levels of testosterone, which would be inconsistent with the low testosterone levels observed in this case.  Androgen insensitivity syndrome (option B) is a condition in which individuals with XY chromosomes are partially or completely insensitive to the effects of androgens. This syndrome is not typically associated with reduced testosterone levels.  Congenital adrenal hyperplasia (option C) is a group of inherited disorders affecting the adrenal glands and can result in various hormonal imbalances. However, the presented symptoms and laboratory results are not indicative of congenital adrenal hyperplasia.  Pituitary adenoma (option E) is a tumor of the pituitary gland that can affect hormone production, including gonadotropins (LH and FSH). However, pituitary adenomas are less likely to cause primary testicular dysfunction leading to low testosterone levels.  Considering the clinical picture, including the symptoms of tiredness, reduced libido, and erectile dysfunction, along with the laboratory findings of low testosterone, LH, and FSH levels, Klinefelter's syndrome is the most likely cause. Further evaluation and genetic testing can be conducted to confirm the diagnosis. Referral to an endocrinologist or a specialist in genetic disorders is recommended for appropriate management and counseling. |
| Attempt 2  The most likely cause of the 45-year-old man's presentation based on the provided information is:  E. Pituitary adenoma  Explanation:  The patient's symptoms of tiredness, reduced libido, and erectile dysfunction, along with the laboratory findings of low testosterone (hypogonadism) and low LH and FSH levels, suggest a potential issue with the hypothalamic-pituitary-gonadal (HPG) axis. The HPG axis controls the production of testosterone and other sex hormones.  In this case, the low levels of LH and FSH indicate a possible dysfunction at the level of the pituitary gland. A pituitary adenoma (a tumor of the pituitary gland) can disrupt the normal secretion of hormones, including LH and FSH. This disruption can lead to decreased testosterone production, resulting in the symptoms of fatigue, reduced libido, and erectile dysfunction.  Options A (anabolic steroid misuse), B (androgen insensitivity syndrome), C (congenital adrenal hyperplasia), and D (Klinefelter's syndrome) are less likely to explain the combination of symptoms and hormone levels seen in this patient. Anabolic steroid misuse might affect hormone levels but would be more likely to result in elevated testosterone levels. Androgen insensitivity syndrome, congenital adrenal hyperplasia, and Klinefelter's syndrome are conditions that can affect hormone levels but would not typically present with a pituitary-related disruption of LH and FSH.  A pituitary adenoma should be investigated and managed by a healthcare professional, and further diagnostic tests (such as imaging and additional hormonal evaluations) may be necessary to confirm the diagnosis and determine the appropriate treatment approach. |
| Attempt 3  The most likely cause of the 45-year-old man's presentation, based on the laboratory results, is:  E. Pituitary adenoma  The low testosterone level (1.8 nmol/L) and low levels of luteinizing hormone (LH) and follicle-stimulating hormone (FSH) suggest a primary hypogonadism, which is commonly caused by testicular dysfunction. However, in this case, the LH and FSH levels are also low, indicating a problem at the hypothalamic-pituitary level.  A pituitary adenoma, specifically a non-functioning adenoma, can interfere with the normal secretion of LH and FSH, leading to decreased testosterone production. This can result in symptoms such as fatigue, reduced libido, and erectile dysfunction.  Other causes listed in the options (A, B, C, D) are less likely based on the given information. Anabolic steroid misuse would typically result in supraphysiological levels of testosterone. Androgen insensitivity syndrome, congenital adrenal hyperplasia, and Klinefelter's syndrome would usually present with different clinical features and hormone profile abnormalities.  Therefore, a pituitary adenoma is the most likely cause of the patient's presentation. Further evaluation, such as imaging studies (e.g., MRI), would be necessary to confirm the diagnosis and determine the appropriate management. |
| **82** | A 24 year old man is admitted to hospital with an exacerbation of asthma. His symptoms improve with treatment, and he is ready for discharge after 24 hours. His discharge medication includes a salbutamol inhaler, a combined beclometasone and salmeterol inhaler, and a short course of oral prednisolone.  Which further management must be provided prior to discharge?  A. Antibiotic rescue pack  B. Course of antihistamines  C. Nebuliser machine for use at home  D. Personalised asthma action plan  E. Volumatic spacer device | Attempt 1  The further management that must be provided prior to discharge for the 24-year-old man with an exacerbation of asthma is:  D. Personalised asthma action plan  A personalized asthma action plan is an essential component of asthma management. It provides guidance to the patient on how to monitor their symptoms, adjust their medications, and recognize when to seek medical help. The action plan outlines specific steps based on the individual's symptoms and peak flow measurements, helping them understand when to increase or decrease medication dosages and when to seek emergency care.  Having a personalized asthma action plan empowers the patient to actively manage their condition, improve self-care, and reduce the risk of future exacerbations. It also helps them understand when to adjust their medication regimen based on their symptoms, ensuring appropriate and timely treatment.  While other options like an antibiotic rescue pack, antihistamines, nebulizer machine, and volumatic spacer device may have their roles in certain situations, a personalized asthma action plan is the most important management strategy to provide prior to discharge in this case. |
| Attempt 2  D. Personalised asthma action plan  Explanation:  A personalised asthma action plan is crucial for patients with asthma, especially after being admitted for an exacerbation. This plan provides clear instructions on how to manage asthma symptoms, what medications to take, and when to seek medical attention. It outlines specific steps to take based on the individual's symptoms and peak flow measurements, helping the patient recognize when their asthma is worsening and when to adjust their medication regimen.  An asthma action plan typically includes "green zone" (well-controlled), "yellow zone" (worsening), and "red zone" (severe exacerbation) instructions. It also guides the patient on adjusting their medications based on their symptoms and peak flow readings. Providing a personalised asthma action plan empowers the patient to take an active role in managing their asthma and can help prevent future exacerbations and hospital admissions.  While options A (antibiotic rescue pack), B (course of antihistamines), C (nebuliser machine for use at home), and E (Volumatic spacer device) might have their own merits in certain situations, they are not as critical as providing the patient with a clear and tailored asthma action plan before discharge. |
| Attempt 3  The most appropriate further management that must be provided prior to discharge for this patient is:  D. Personalised asthma action plan.  A personalized asthma action plan is a written document that provides guidance to the patient on how to manage their asthma symptoms and adjust their medication based on their individualized treatment goals. It includes information on the patient's daily controller medications, rescue medications, peak flow monitoring (if applicable), and specific instructions on when and how to adjust their medication in response to changes in symptoms or peak flow readings.  Having a personalized asthma action plan is crucial in empowering the patient to self-manage their asthma effectively and recognize early signs of worsening symptoms. It helps them understand when to increase their medication, when to seek medical attention, and when to follow up with their healthcare provider. This promotes better asthma control and reduces the risk of exacerbations.  While the patient may have received appropriate medications for their asthma exacerbation, it is important to provide them with a personalized asthma action plan to enhance their understanding of the condition and optimize their self-management skills. This ensures that they have a clear plan to follow after discharge and can take appropriate actions to prevent future exacerbations. |
| **83** | A 40 year old man develops sudden breathlessness 5 days after an acute inferior ST-elevation myocardial infarction treated by primary coronary intervention. His pulse rate is 110 bpm, BP 110/75 mmHg, respiratory rate 22 breaths per minute and oxygen saturation 92% on breathing 28% oxygen. There is a pansystolic murmur at the apex and bibasal inspiratory crackles.  Which is the most likely cause of this presentation?  A. Acute pulmonary embolus  B. Aortic regurgitation  C. Cardiac tamponade  D. Papillary muscle rupture  E. Pericarditis | Attempt 1  Based on the provided information, the most likely cause of this presentation in a patient who developed sudden breathlessness 5 days after an acute inferior ST-elevation myocardial infarction is:  C. Cardiac tamponade.  The presence of a pansystolic murmur at the apex, bibasal inspiratory crackles, and signs of hemodynamic compromise (elevated heart rate, decreased blood pressure, and hypoxemia) are suggestive of cardiac tamponade. Cardiac tamponade occurs when fluid (such as blood) accumulates in the pericardial space, leading to compression of the heart and impaired cardiac filling. It can occur as a complication of myocardial infarction, particularly in the setting of rupture of the free wall or papillary muscles.  In this case, the patient's history of acute inferior ST-elevation myocardial infarction treated by primary coronary intervention raises suspicion for a potential cardiac complication. The development of sudden breathlessness along with the presence of a pansystolic murmur, which can be indicative of mitral regurgitation secondary to papillary muscle dysfunction, further supports the possibility of cardiac tamponade. The bibasal inspiratory crackles suggest the presence of pulmonary congestion, which can be seen in cardiac tamponade due to increased left ventricular filling pressures.  It is important to promptly diagnose and manage cardiac tamponade as it can be a life-threatening condition. Immediate interventions such as pericardiocentesis or surgical drainage may be necessary to relieve the tamponade and restore cardiac function. |
[truncated: 565,404 more chars]
